# Supplementary material for: Cancer cell autophagy, reprogrammed macrophages, and remodeled vasculature in glioblastoma triggers tumor immunity
Source: PubMed Central journal article supplement (PMC9580613; doi:10.1016/j.ccell.2022.08.014), 2022-10-10
Supplement: mmc1.pdf [file mmc1.pdf]

**Cancer Cell, Volume 40**

**Supplemental information**

**Cancer cell autophagy, reprogrammed  
macrophages, and remodeled vasculature  
in glioblastoma triggers tumor immunity**

**Agnieszka Chryplewicz, Julie Scotton, Mélanie Tichet, Anook Zomer, Ksenya Shchors, Johanna A. Joyce, Krisztian Homicsko, and Douglas Hanahan**

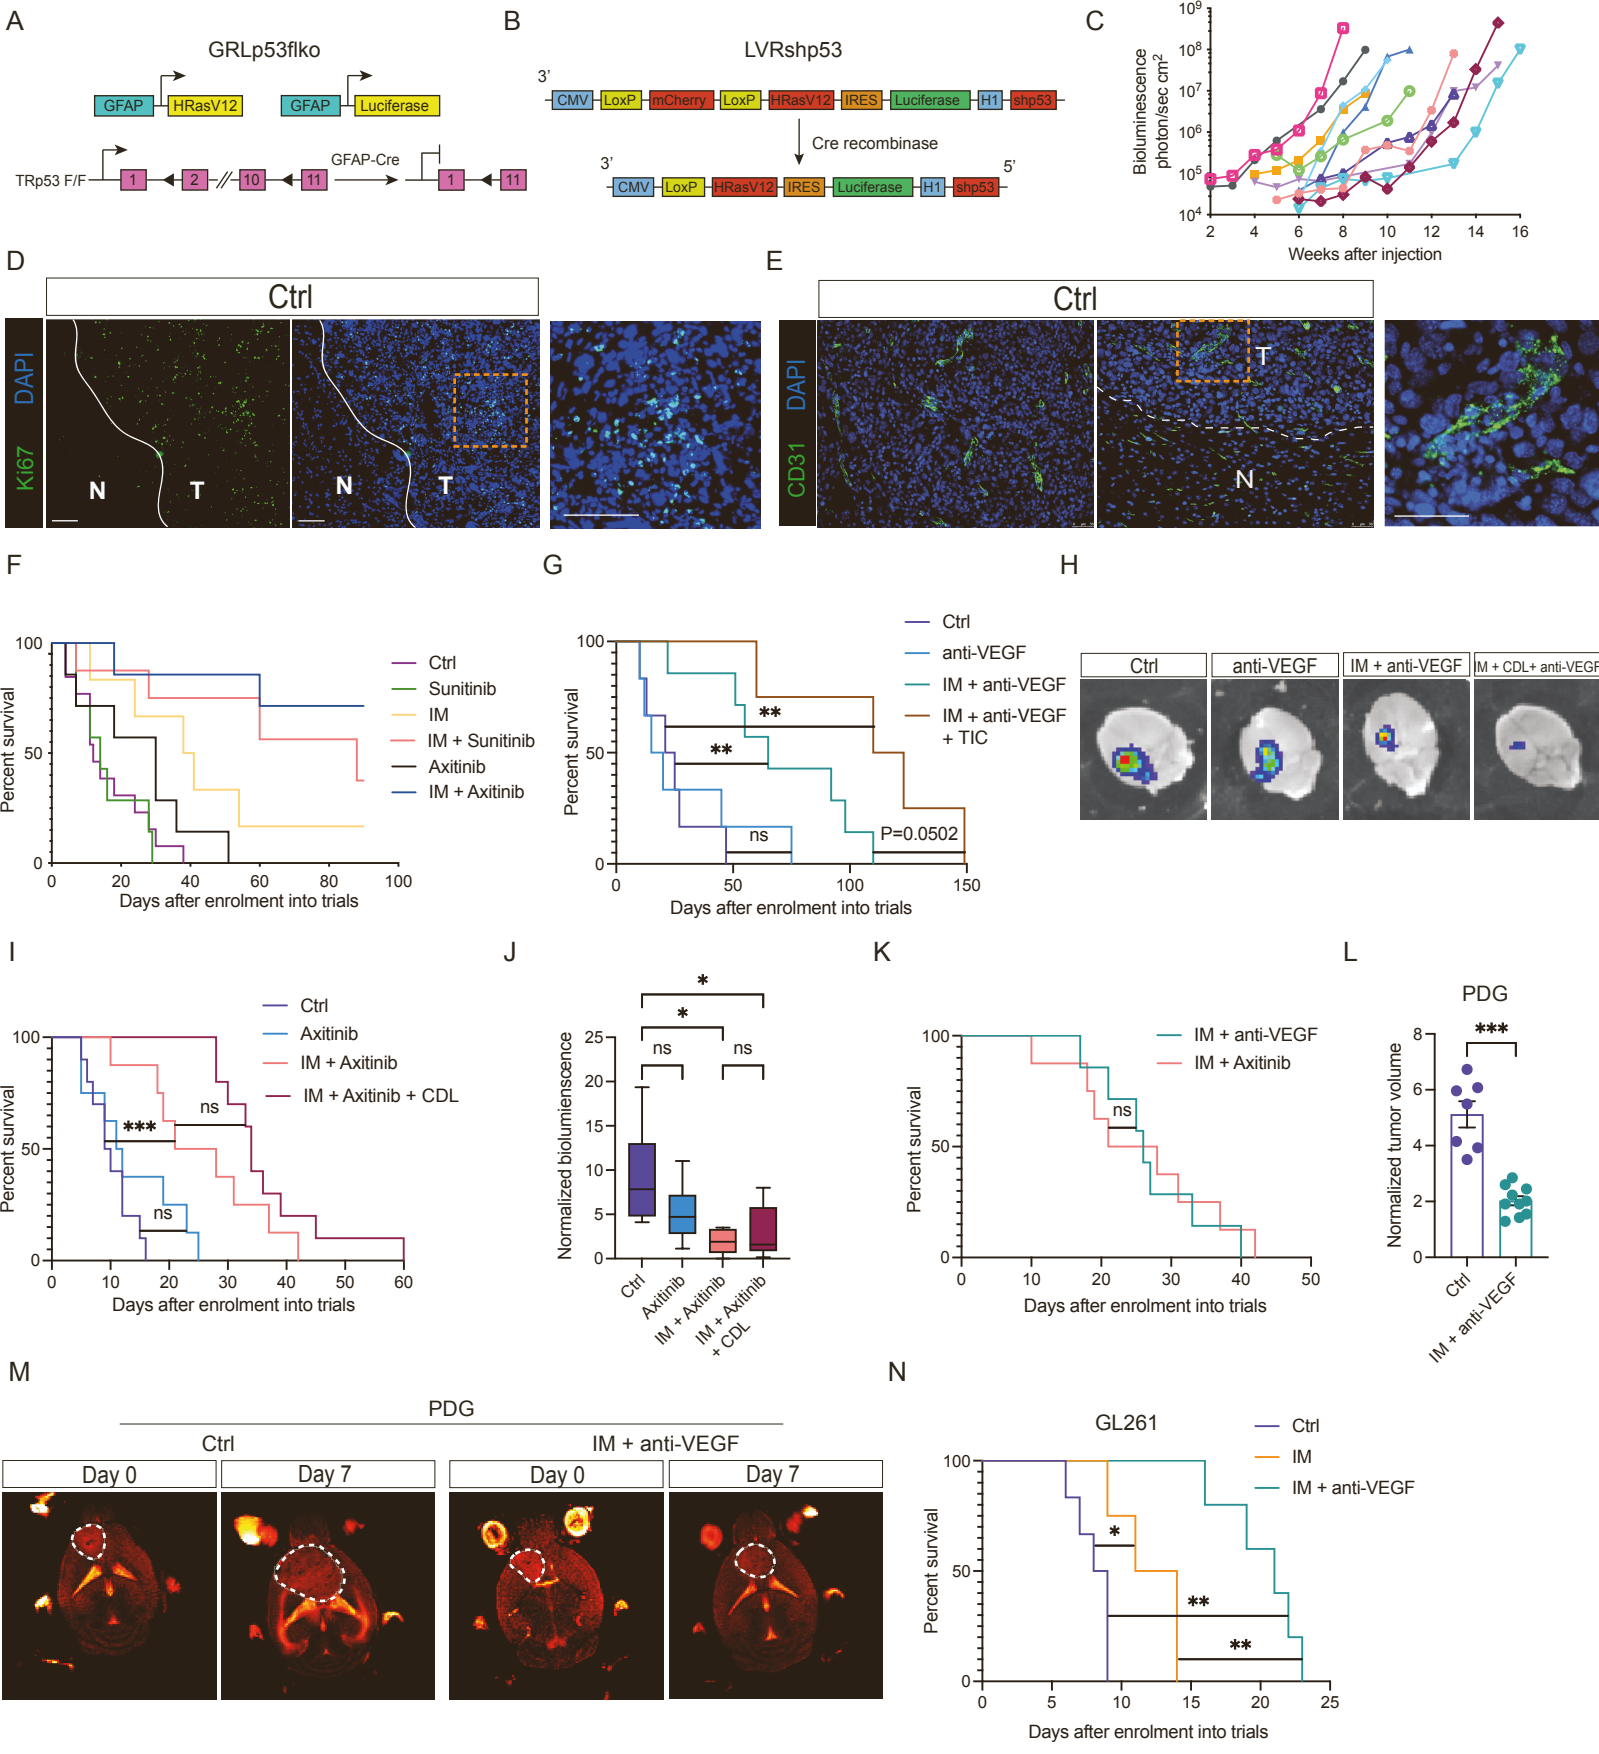

**Fig S1: Characterization of the GBM mouse models and survival trials illustrating the survival benefit from IM + anti-VEGF therapy, related to Fig 1**

- A) Diagram of the transgenes in the previously described (Shchors et al., 2015) transgenic mouse model of GBM.
- B) Diagram of the pTomo HRasV12-shp53-Luc lentivirus vector, adapted from a previously described vector (Friedmann-Morvinski et al., 2016) by the addition of luciferase and shp53. The mCherry gene cassette keeps the HRasV12 gene in an off-state. When Cre recombinase deletes the mCherry cassette, HRasV12 is expressed together with luciferase and shp53.
- C) Temporal evolution of bioluminescence after inoculation of the GBM-inducing lentivirus into GFAP-Cre transgenic mice. Each line represents an individual animal.
- D) Ki67 (green) staining showing a high proliferative index in a representative LVRshp53 GBM tumor. T: Tumor, N: Normal adjacent brain. Scale bar 50 $\mu$ m. The image is representative of a whole tissue scan of 4 untreated tumors.
- E) Representative images of CD31 (green) staining showing hyper- and abnormal vasculature in a LVRshp53 tumor, compared to normal adjacent tissue visible in the right panel. Scale bar 50 $\mu$ m. The image is illustrative of a full tumor section of 4 untreated tumors.
- F) Kaplan-Meier survival analysis of tumor-bearing GRLp53het transgenic mice in cohorts treated as indicated. Ctrl (n=13), Sunitinib (n=7), IM (n=6), IM + Sunitinib (n=8), Axitinib (n=7), IM + Axitinib (n=7).
- G) Survival of tumor-bearing GRLp53flko transgenic mice subjected to the indicated treatments. Ctrl (n=6), anti-VEGF (n=6), IM + anti-VEGF (n=7), IM + anti-VEGF + TIC (n=6). \*p<0.05, \*\*p<0.01 by Mantel-Cox test.
- H) Illustrative ex-vivo bioluminescence imaging of brains from LVRshp53 animals subjected to the indicated treatments. Mice were enrolled in the different treatment arms with similar bioluminescence (neoplastic burden) and analyzed 1 week later. Note that in this model, single tumors typically arise, in contrast to the multi-focality of the transgenic mouse model.
- I) Survival of tumor-bearing LVRshp53 animals subjected to the indicated treatments. Ctrl (n=9), Axitinib (n=8), IM + Axitinib (n=7), IM + Axitinib + CDL (n=10). \*\*\*p<0.001, ns, no statistical significance by Mantel-Cox test.
- J) Normalized bioluminescence signals of LVRshp53 animals treated as indicated after 7 days. Data are represented as mean +/- SEM. Statistical analysis by one-way ANOVA with Tukey's correction. \*p<0.05, ns, no statistical significance. (n=6 per group)

- K) Survival of tumor-bearing LVRshp53 animals comparing the anti-VEGF Mab with a VEGFR TKI when combined with imipramine. IM + anti-VEGF (n=7), IM + Axitinib (n=7). ns, no statistical significance by Mantel-Cox test.
- L) Normalized tumor volume determined by MRI in proneural PDG transgenic mice treated for 7 days with IM + anti-VEGF, compared to untreated. Ctrl (n=7), IM + anti-VEGF (n=10). \*\*\*p<0.001 by Mann-Whitney test. Data are presented as mean ± SEM.
- M) Representative MRI images of tumors in an untreated vs. an IM + anti-VEGF treated PDG animal over the course of 7 days, from the cohorts analyzed in S1L.
- N) Survival of tumor-bearing animals following orthotopic inoculation of GL261 GBM cancer cells. Ctrl (n=6), IM (n=4), IM + anti-VEGF (n=5). Statistical significance by Mantel-Cox test. \*p<0.05, \*\*p<0.01.



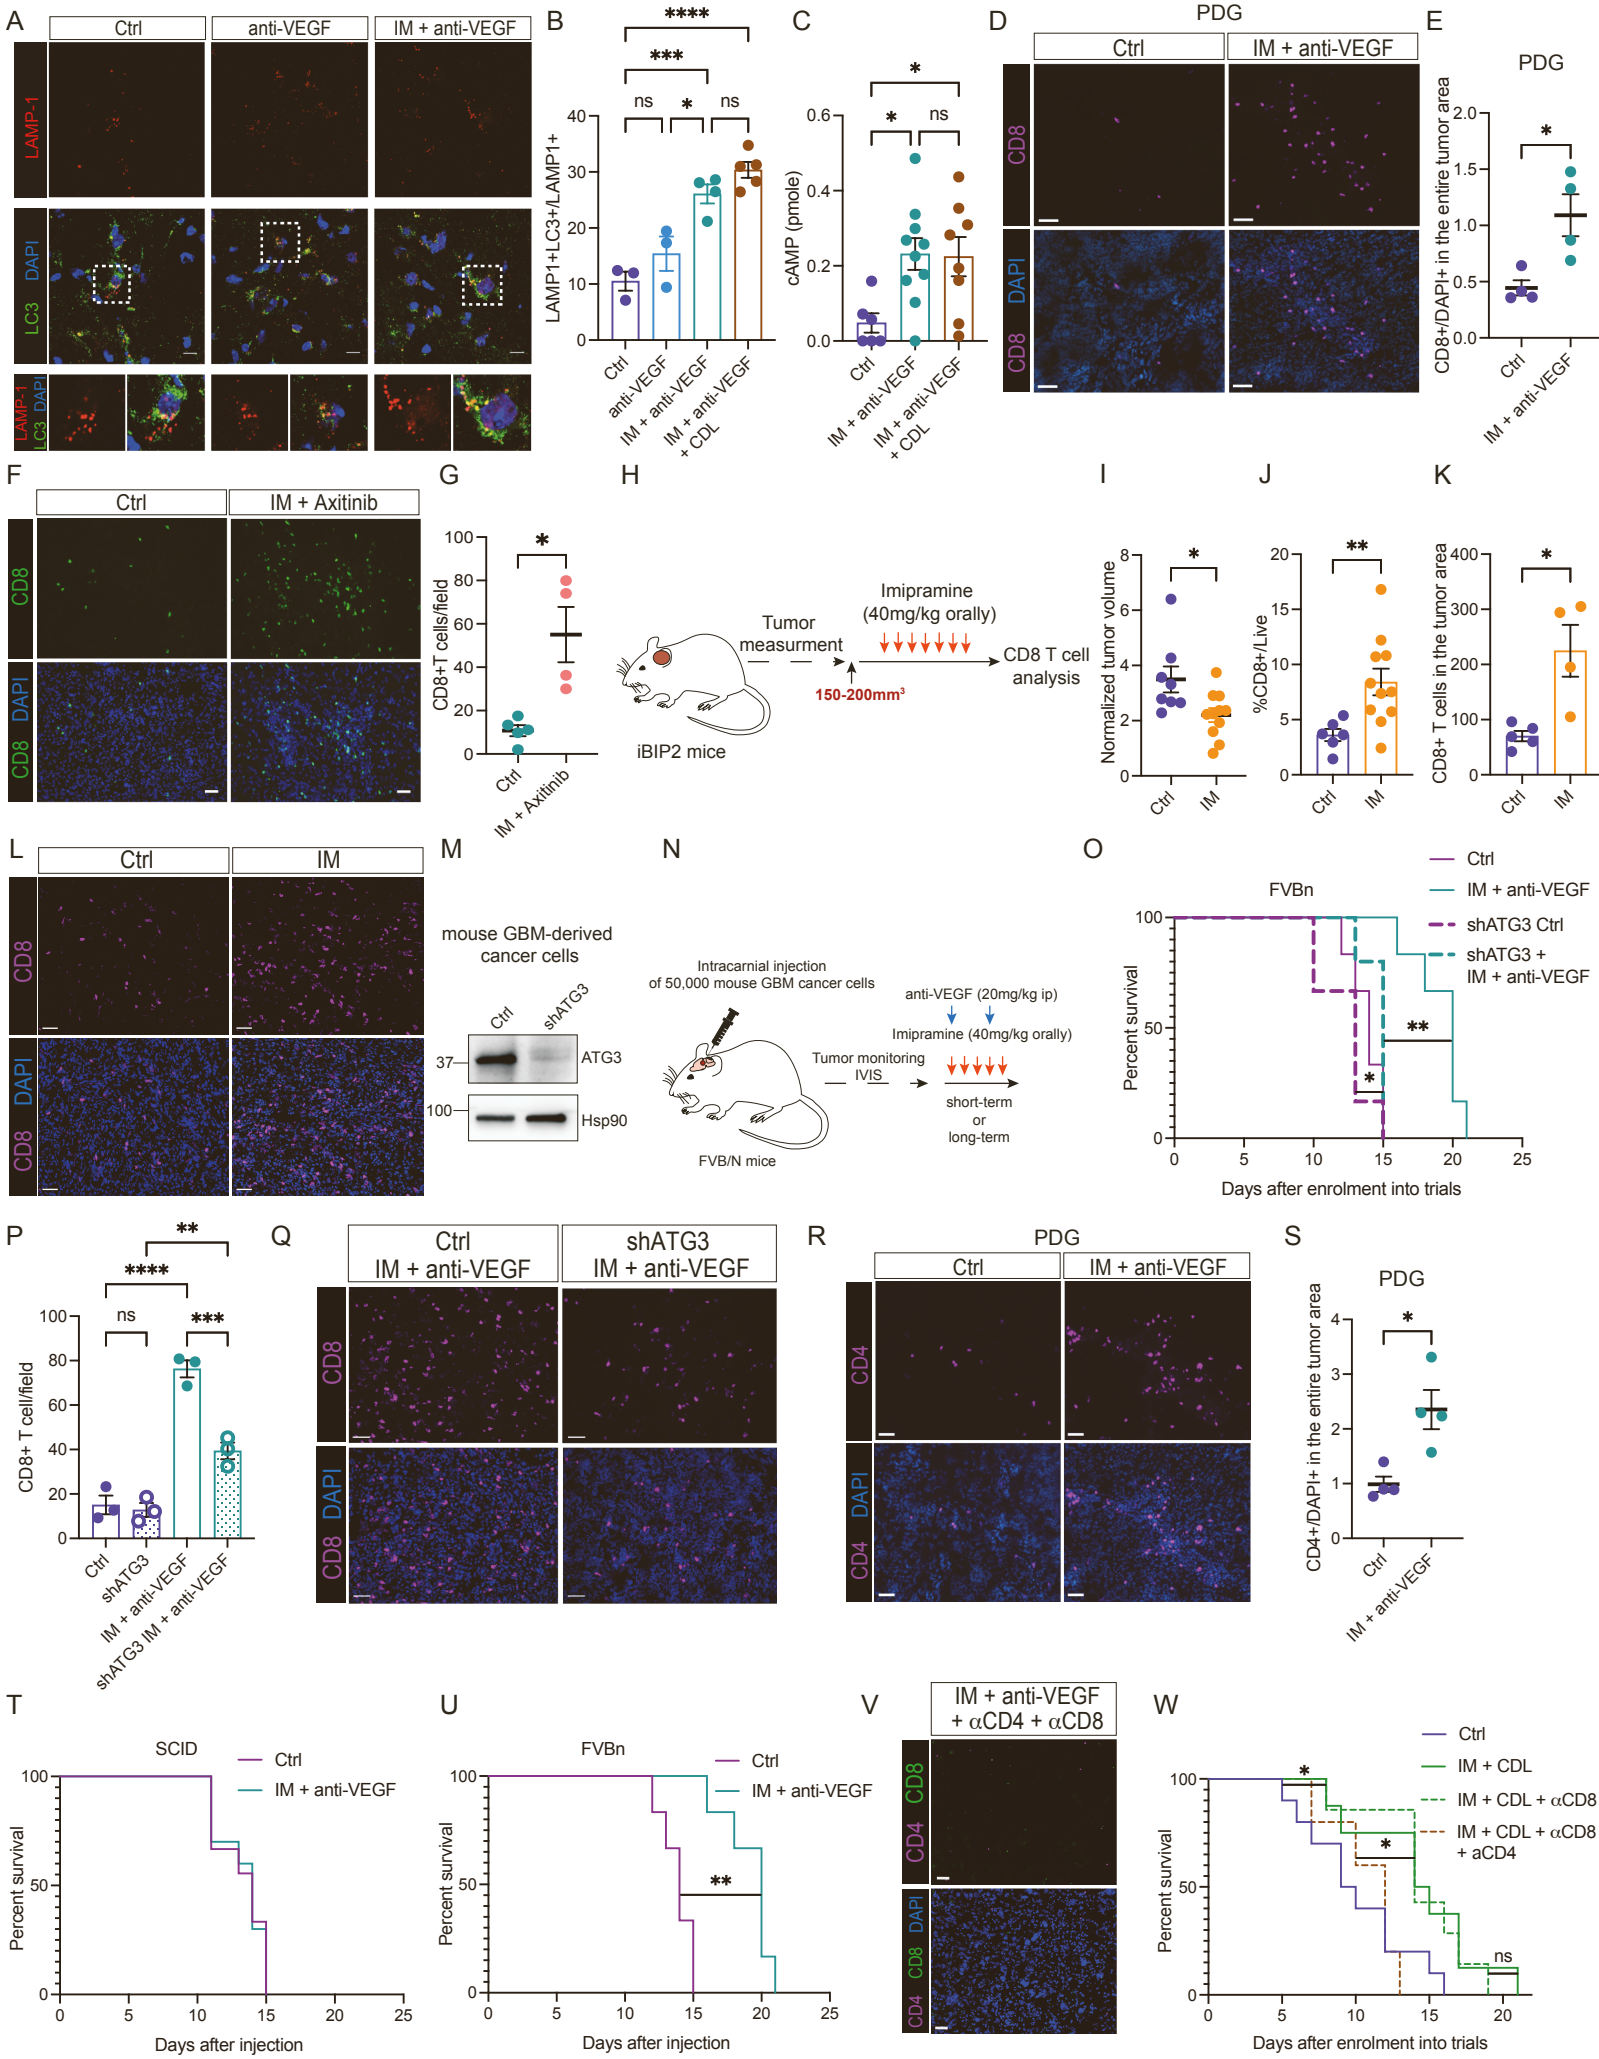

**Fig S2: T lymphocytes are recruited by IM + anti-VEGF in multiple mouse models, and induction of autophagy is functionally important for anti-tumor immunity, related to Fig 1**

- A) Representative images of LC3 (green) and LAMP-1 (red) immunostaining of LVRshp53 tumor samples subjected to the indicated treatment for one week. Bottom panels illustrate the co-localization indicative of the culmination of autophagy in lysosomes, magnified 2.5X. Scale bar 10 $\mu$ m. Images are illustrative of the analysis shown in Fig S2B.
- B) Quantification of LC3 and LAMP1 co-localization as a percentage of total LAMP1 positive lysosomes in LVRshp53 tumor samples subjected to the indicated treatment for one week. Bars represent mean  $\pm$  SEM. Value for each replicate was obtained by averaging the quantification for 6-9 fields per tumor, each from a different mouse. Ctrl (n=3), anti-VEGF (n=3), IM + anti-VEGF (n=4), IM + anti-VEGF + CDL (n=5). Statistical analysis by one-way ANOVA with Tukey's correction. \*\*\*\*p<0.0001, \*\*\*p<0.001, ns, no statistical significance.
- C) cAMP levels in control tumors and tumors treated with IM + anti-VEGF or IM + anti-VEGF + CDL, adjusted to tumor weight. Ctrl (n=6), IM + anti-VEGF (n=10), IM + anti-VEGF + CDL (n=8). Statistical analysis by one-way ANOVA with Tukey's correction. Bars represent mean  $\pm$  SEM. \*p<0.05, ns, no statistical significance.
- D) Representative images of CD8 (magenta) and DAPI nuclear staining (blue) of proneural PDG tumors treated as indicated for 10 days. Scale bar 50 $\mu$ m. Images represent the analysis shown in Fig S2E.
- E) Quantification of CD8 T cells in control (n=4) and IM + anti-VEGF (n=4) tumors from the proneural PDG model. Each dot indicates the total number of CD8 T cells in the entire cross-sectional area of a tissue section from one tumor. Statistical analysis by Mann-Whitney test. \*p<0.05. Data are presented as mean  $\pm$  SEM.
- F) Representative images of CD8 (green) and DAPI nuclear staining (blue) of LVRshp53 tumors treated with IM plus the VEGFR inhibitor Axitinib, as quantified in Fig S2G. Scale bar 50 $\mu$ m.
- G) Quantification of CD8 T cells in LVRshp53 tumors treated with IM plus the VEGFR inhibitor axitinib. Each dot represents the average of 8 to 14 images for one mouse. Ctrl (n=5), IM + Axitinib (n=4). Statistical analysis by Mann-Whitney test. \*p<0.05. Data are presented as mean  $\pm$  SEM.
- H) Schematic of the short-term trials for testing the efficacy of IM in the iBIP2 mouse model of BRAF-driven melanoma.

- I) Normalized iBIP2 tumor volume after 7 days. Ctrl (n=8), IM (n=11). Statistical analysis by Mann-Whitney test. \* $p < 0.05$ . Data are presented as mean  $\pm$  SEM.
- J) Flow cytometry analysis of CD8 T cells in the live cell compartment of iBIP2 melanoma tumors treated as indicated. Ctrl (n=6), IM (n=11). \*\* $p < 0.01$  by Mann-Whitney test. Data are presented as mean  $\pm$  SEM.
- K) Quantification of CD8 immunostaining as a percentage of DAPI-positive cells in full tissue sections of iBIP2 tumors. Ctrl (n=5), IM (n=4). \* $p < 0.05$  by Mann-Whitney test. Data are presented as mean  $\pm$  SEM. Data are presented as mean  $\pm$  SEM.
- L) Representative images of CD8 (magenta) and nuclei (DAPI, blue) in untreated and IM-treated melanoma tumors. Images are illustrative of the analysis shown in Fig S2K. Scale bar 50 $\mu$ m.
- M) Western blot analysis of ATG3 in mouse glioma-derived control and shATG3-transfected cells in culture.
- N) Schematic of the orthotopic syngeneic mouse model designed to evaluate CD8 T cell influx upon ATG3 knockdown in cancer cells.
- O) Survival of mice following orthotopic inoculation with control or shATG3 glioma cell lines treated with IM + anti-VEGF. Ctrl (n=6), IM + anti-VEGF (n=6), shATG3 Ctrl (n=6), shATG3 IM + anti-VEGF (n=5). Statistical analysis by Mantel-Cox test. \* $p < 0.05$ , \*\* $p < 0.01$ .
- P) Quantification of CD8 T cells in control and shATG3 tumors treated with IM + anti-VEGF. Each dot indicates the average of 7 to 11 images from one tumor; tumors from 3 mice were analyzed for each condition. Statistical analysis by one-way ANOVA with Tukey's correction. \*\* $p < 0.01$ , \*\*\* $p < 0.001$ , \*\*\*\* $p < 0.0001$ . Data are presented as mean  $\pm$  SEM.
- Q) Representative images of CD8 (magenta) and nuclei (DAPI, blue) in control and shATG3 tumors treated with IM + anti-VEGF. Images are illustrative of the analysis presented in Fig S2P. Scale bar 50 $\mu$ m.
- R) CD4 (magenta) and DAPI nuclear staining (blue) of proneural PDG tumors treated with IM + anti-VEGF for 10 days, representative of the analysis shown in Fig S2S. Scale bar 50 $\mu$ m.
- S) Quantification of CD4 T cells in control (n=4) and IM + anti-VEGF (n=4) tumors from the PDG model. Each dot indicates the total number of CD8 T cells in the entire cross-sectional area of a tissue section from one tumor; 4 tumors were analyzed, each from a different mouse. Statistical analysis by Mann-Whitney test. \* $p < 0.05$ . Data are mean  $\pm$  SEM.
- T) Survival of immunocompromised SCID animals orthotopically transplanted with a mouse-derived glioma cell line and treated with IM + anti-VEGF. Experiments from panel T and U were performed at the same time with the same batch of cells. Ctrl (n=9) and IM + anti-VEGF (n=10). Ns, no statistical significance by Mantel-Cox test.

- U) Survival of immunocompetent FVBn animals orthotopically transplanted with a mouse-derived glioma cell line and treated with IM + anti-VEGF. Ctrl (n=6) and IM + anti-VEGF (n=6). \*\*p<0.01 by Mantel-Cox test.
- V) Representative image from a tumor-bearing LVRshp53 animal treated with IM + CDL plus depleting antibodies to CD8 and CD4 T cells, illustrating the depletion. Image is illustrative of a whole-tumor scan from 3 different tumors. Scale bar 50 $\mu$ m.
- W) Survival of tumor-bearing LVRshp53 animals treated with IM + CDL +/- depleting antibodies to assess the functional contributions of CD8 and CD4 T cells to survival benefit. Ctrl (n=10), IM + CDL (8), IM + CDL +  $\alpha$ CD8 +  $\alpha$ CD4 (n=5), IM + CDL +  $\alpha$ CD8 (n=7). \*p<0.05, ns, no statistical significance by Mantel-Cox test.

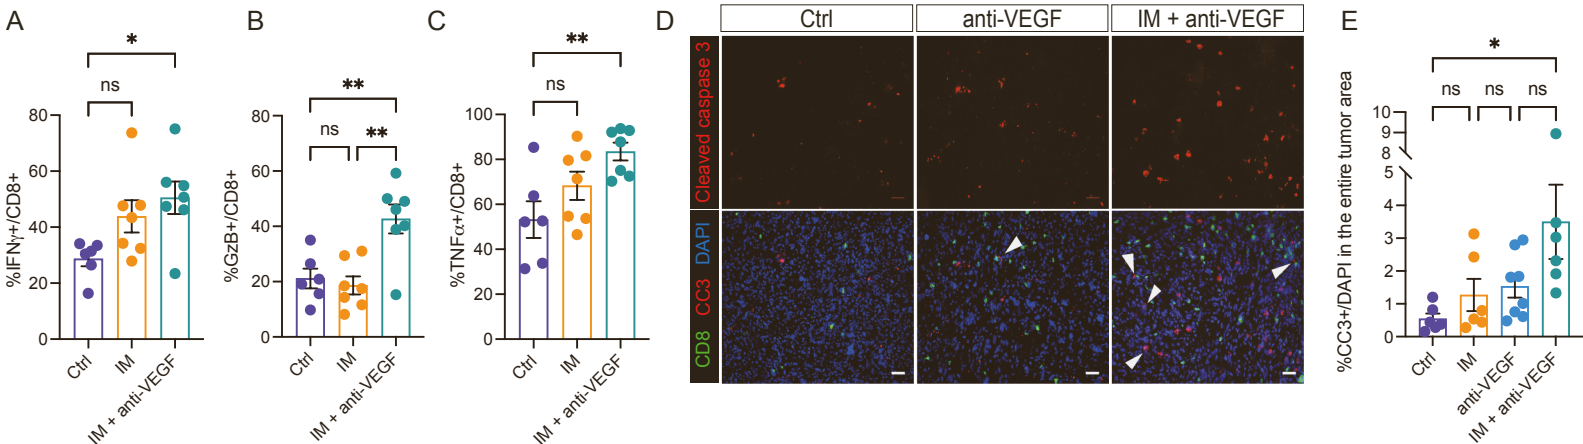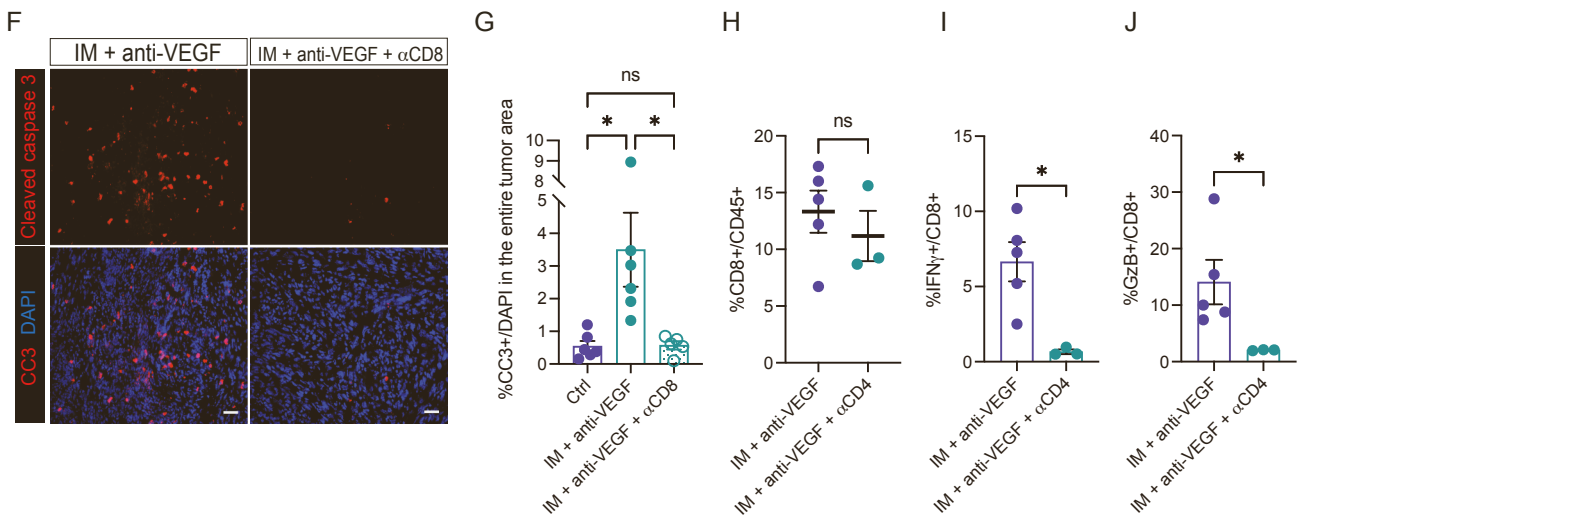

**Fig S3: Further characterization of the activities of intratumoral CD8 and CD4 T cells,**  
related to Fig 2

- A) Flow cytometry analysis of IFN $\gamma$  intracellular staining in fixed and permeabilized CD8+T cells isolated from tumors treated with IM or IM + anti-VEGF. Ctrl (n=6), IM (n=7), IM + anti-VEGF (n=7). Statistical analysis by one-way ANOVA with Tukey's correction. \*p<0.05, ns, no statistical significance.
- B) Flow cytometry analysis of GzB intracellular staining in fixed and permeabilized CD8 T cells, as in A). Ctrl (n=6), IM (n=7), IM + anti-VEGF (n=7). Statistical analysis by one-way ANOVA with Tukey's correction. \*\*p<0.01, ns, no statistical significance.
- C) Flow cytometry analysis of TNF $\alpha$  intracellular staining in fixed and permeabilized CD8 T cells, as in A). Ctrl (n=6), IM (n=7), IM + anti-VEGF (n=7). Statistical analysis by one-way ANOVA with Tukey's correction. \*\*p<0.01, ns, no statistical significance.
- D) Representative Cleaved Caspase-3 (CC-3) (red), CD8 (green) and DAPI (blue) staining of LVRshp53 tumors subjected to indicated treatments. Images are representative of 8-10 images from 3 different tumors. White arrows show adjacent CD8+ and CC-3+ cells. Scale bar 50 $\mu$ m.
- E) Quantification of CC-3 positive cells in the entire tumor area in LVRshp53 tumors. Ctrl (n=6), IM (n=6), anti-VEGF (n=8), IM + anti-VEGF (n=6). \*p<0.05, ns, no statistical significance by one-way ANOVA with Tukey's correction.
- F) Representative CC-3 (red) and DAPI staining of CD8-depleted and nondepleted LVRshp53 tumors undergoing treatment with IM + anti-VEGF. Images are illustrative of 8-10 images from 3 different tumors. Scale bar 50 $\mu$ m.
- G) Quantification of CC-3 immunostaining as a percentage of DAPI-positive cells in the whole LVRshp53 tumor area. Ctrl (n=6), IM + anti-VEGF (n=6), IM + anti-VEGF +  $\alpha$ CD8 (n=5). Statistical analysis by one-way ANOVA. \*p<0.05, ns, no statistical significance.
- H) Flow cytometry analysis of CD8 T cells in tumors treated with IM + anti-VEGF +/- depletion of CD4 T cells. IM + anti-VEGF (n=5), IM + anti-VEGF +  $\alpha$ CD4 (n=3). Statistical analysis by Mann-Whitney test, ns, no statistical significance.
- I) Flow cytometry analysis of IFN $\gamma$  intracellular staining in fixed and permeabilized CD8 T cells from tumors treated with IM + anti-VEGF +/- depletion of CD4 T cells. IM + anti-VEGF (n=5), IM + anti-VEGF +  $\alpha$ CD4 (n=3). Statistical analysis by Mann-Whitney test, \*p<0.05.

J) Flow cytometry analysis of GzB intracellular staining in fixed and permeabilized CD8 T cells, as for H/I). IM + anti-VEGF (n=5), IM + anti-VEGF +  $\alpha$ CD4 (n=3). \*p<0.05 by Mann-Whitney test.

Quantitative data in all relevant panels are presented as mean  $\pm$  SEM.



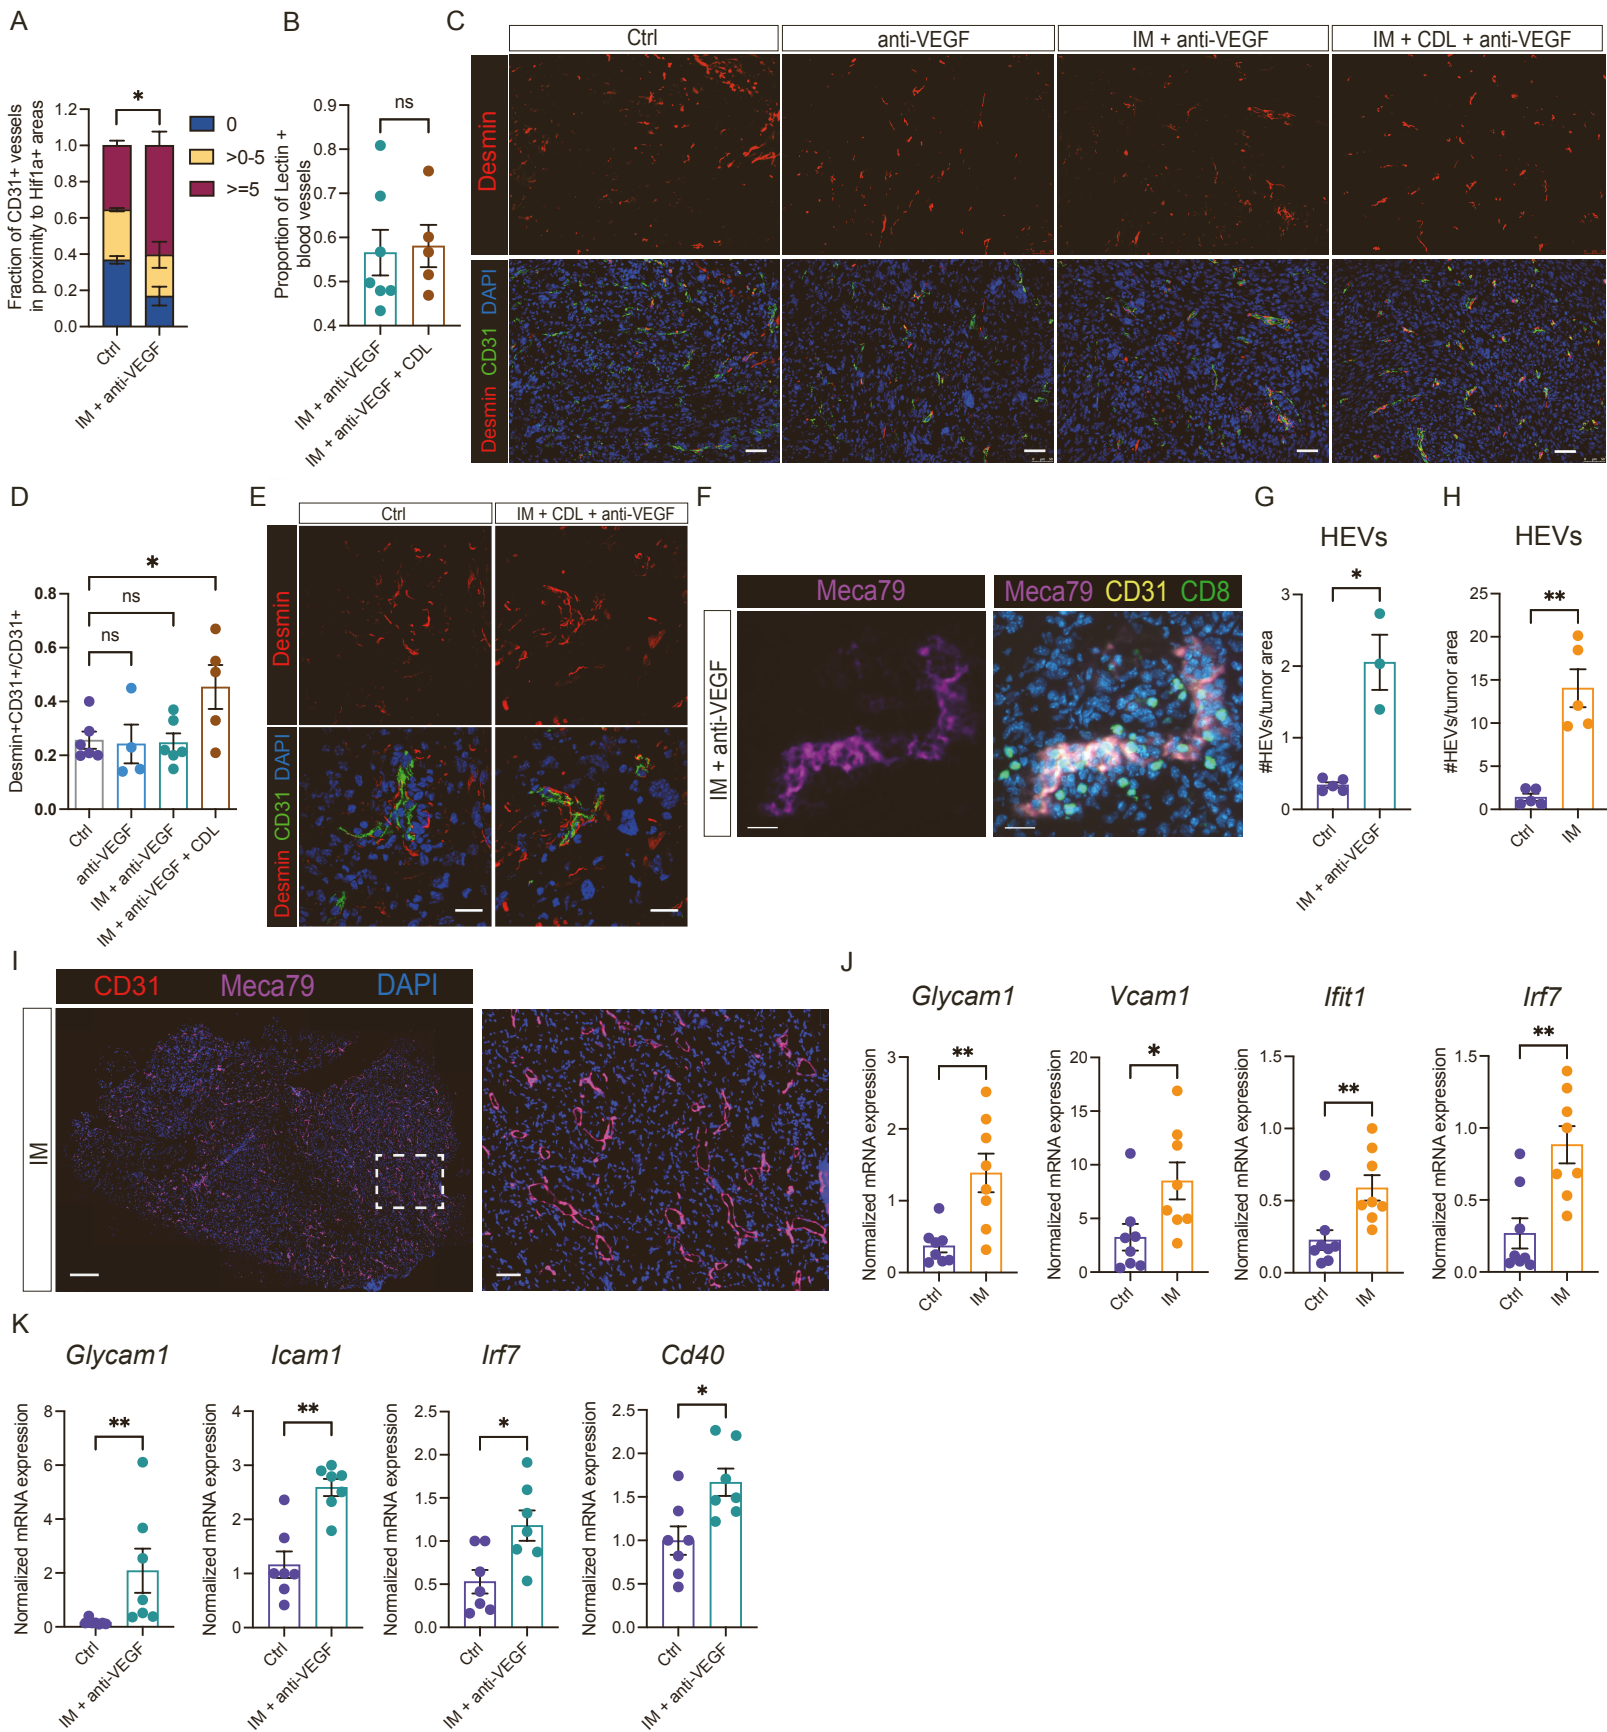



**Fig S4: Tumor vessels are remodeled ('quasi-normalized') upon treatment with IM + anti-VEGF in GBM and melanoma tumors, related to Fig 3**

- A) Fraction of CD31<sup>+</sup> vessels located in HIF1 $\alpha$ <sup>+</sup> zones in the entire area of full sections of GBM tumors. The zones were divided into 0 $\mu$ m (i.e., within the Hif1 $\alpha$ <sup>+</sup> zone), >0 and <5 $\mu$ m, and >5 $\mu$ m. Ctrl (n=5), IM + anti-VEGF (n=6). \*p<0.05 by Mann-Whitney test.
- B) The proportion lectin<sup>+</sup> blood vessels is not affected by the addition of CDL. Each dot indicates the average of 8 to 12 fields in tissue sections from a GBM tumor from one mouse. IM + anti-VEGF (n=7), IM + anti-VEGF + CDL (n=5). Statistical analysis by Mann-Whitney test. Bars represent mean +/- SEM. ns, no statistical significance.
- C) Representative immunofluorescence of desmin (red), CD31 (green) and DAPI (blue) in animals treated for 1 week, as indicated. Images are representative of the analysis performed in Fig S4C. Scale bar 50 $\mu$ m.
- D) Quantification of desmin<sup>+</sup> and CD31<sup>+</sup> cells as a percentage of CD31 positive areas within tissue sections from tumors treated as indicated. Ctrl (n=6), anti-VEGF (n=4), IM + anti-VEGF (n=6), IM + anti-VEGF + CDL (n=5). Statistical analysis by one-way ANOVA. \*p<0.05, ns, no statistical significance.
- E) Representative high magnification images of desmin<sup>+</sup> and CD31<sup>+</sup> cells. Scale bar 10 $\mu$ m. Images are representative of the analysis performed in Fig S4C.
- F) Representative immunofluorescence of MECA79 (magenta), CD31 (bright yellow) and CD8 (green) of proneural PDG tumors treated as indicated for 10 days. Scale bar 20 $\mu$ m. Images are illustrative of the analysis in Fig S4E.
- G) Quantification of immunostaining for HEVs in PDG tumors treated with IM + anti-VEGF (n=3) or untreated controls (n=5). The data are shown as number of HEVs per mm<sup>2</sup> of tumor tissue. \*p<0.05 by Mann-Whitney test.
- H) Quantification of immunostaining for HEVs in iBIP2 melanoma tumors treated with IM. Ctrl (n=5) and IM (n=5). The data are shown as number of HEVs per mm<sup>2</sup> of tumor tissue. \*\*p<0.01 by Mann-Whitney test.
- I) Representative immunofluorescence images of MECA79 (magenta), CD31 (red) and DAPI (blue) in iBIP2 melanoma tumors treated with IM. Scale bars 250 $\mu$ m and 50 $\mu$ m. Images are illustrative of the analysis shown in Fig S4F.
- J) mRNA expression of *Glycam1*, *Vcam1*, *Ifit1* and *Irf7* in CD31<sup>+</sup> endothelial cells from melanoma tumors subjected to IM (n=8) or untreated (n=8). Statistical significance by Mann-Whitney test. \*p<0.05, \*\*p<0.01.

K) mRNA profiling of endothelial cells isolated from PDG glioma tumors. The expression of *Glycam1*, *Icam1*, *Irf7* and *Cd40* was normalized to *18S* RNA. \*p<0.05, \*\*p<0.01 by Mann-Whitney test.

Quantitative data in all relevant panels are presented as mean  $\pm$  SEM.

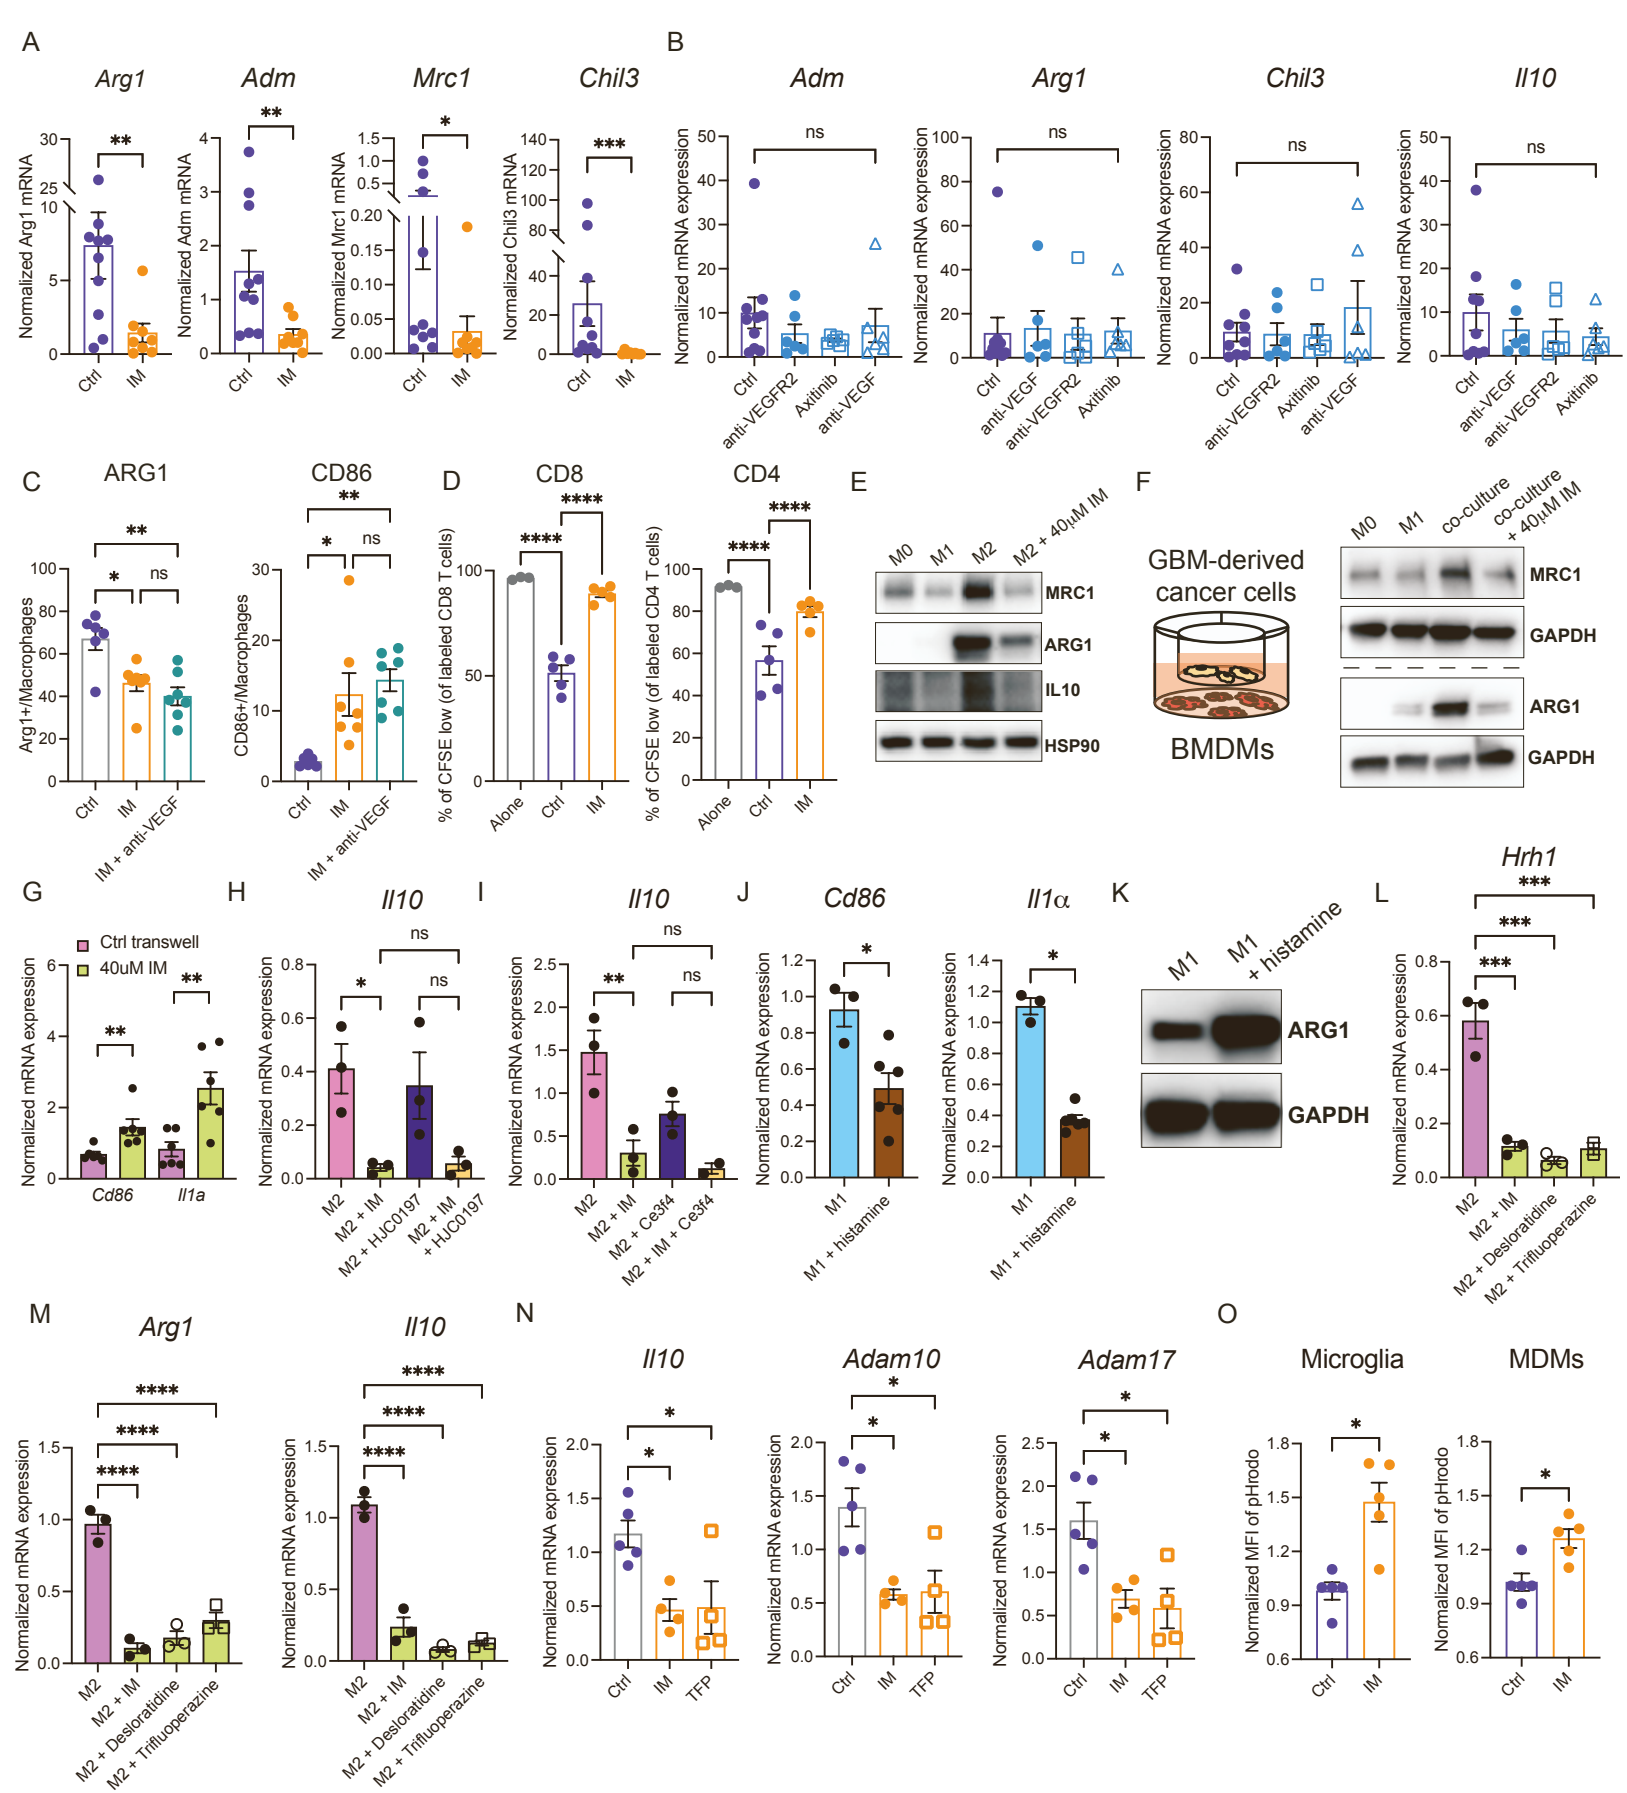

Fig S5: **Imipramine reprograms immunosuppressive myeloid cells via HRH1 targeting**, related to Fig 4

- A) mRNA expression of the M2-like macrophage markers *Arg1*, *Adm*, *Mrc1* and *Chil3* in Ctrl (n=10) and IM-treated (n=8) LVRshp53 tumors. \*\*\*p<0.001, \*\*p<0.01, \*p<0.05 by Mann-Whitney test.
- B) mRNA expression of the M2-like markers *Adm*, *Arg1*, *Chil3* and *Il10* in Ctrl (n=9-10), anti-VEGFR2 (DC101) (n=6), Axitinib (n=6), anti-VEGF (n=6) treated tumors. ns, no statistical significance by one-way ANOVA.
- C) Flow cytometry analysis of ARG1 and CD86 expression in proneural PDG glioma tumors treated for one week. Ctrl (n=6), IM (n=7), IM + anti-VEGF (n=7). Macrophages were gated as CD45<sup>+</sup>CD11b<sup>+</sup>Ly6C<sup>-</sup>Ly6G<sup>-</sup>. Statistical analysis by one-way ANOVA with Tukey's correction. \*p<0.05, \*\*p<0.01, ns, no statistical significance.
- D) Co-cultures of tumoral CD11b cells from PDG tumors combined with activated splenic CFSE-labeled CD8 or CD4 T cells. Each dot represents the average of 1-3 technical replicates. T cells alone (n=3), Ctrl co-cultures (n=5), and co-cultures with anti-VEGF (n=3) or IM (n=5). Statistical analysis by two-way ANOVA. \*\*\*\*p<0.0001, ns, no statistical significance.
- E) Western blot analysis of ARG1, MRC1 and IL10 in *ex-vivo* polarized bone marrow-derived macrophages. M2-like BMDMs were treated with 40μM imipramine for 24 hours. Experiment was repeated 3 times.
- F) Western blot analysis of MRC1 and ARG1 in polarized bone marrow-derived macrophages in transwell co-cultures with cancer cells derived from the LVRshp53 GBM mouse model. M2-like BMDMs were treated with 40μM imipramine for 24 hours. Data are representative of 2 independent experiments.
- G) Analysis of the M1-like marker genes *CD86* and *IL1α* in polarized BMDMs in a transwell assay with cancer cells +/- IM as assessed by qRT-PCR and normalized to *18S* RNA. Cells were treated with 40μM imipramine for 24 hours. \*\*p<0.01 by Mann-Whitney test. Data are representative of 2 independent experiments.
- H) Analysis of *Il10* expression in M2-polarized BMDMs treated with 40μM IM, 25 μM HJC0197 or the combination for 24 hours. Expression is normalized to *18S* RNA. \*p<0.05, ns, no statistical significance by one-way ANOVA. Data are representative of 2 independent experiments.

- I) Analysis of *Il10* expression in M2-polarized BMDMs treated with 40 $\mu$ M IM, 50  $\mu$ M Ce3f4 or the combination for 24 hours. Expression is normalized to *18S* RNA. \* $p < 0.05$ , ns, no statistical significance by one-way ANOVA. Data are representative of 2 independent experiments.
- J) mRNA levels of *Cd86* and *Il1a* in M1-polarized BMDMs treated with 50 $\mu$ M histamine for 24 hours. \* $p < 0.05$  by Mann-Whitney test. Data are representative of 2 independent experiments.
- K) Western blot analysis of ARG1 in one of the replicates from panel J).
- L) mRNA expression of *Hrh1* normalized to *18S* RNA in M2-polarized BMDMs, either untreated or treated with 40 $\mu$ M imipramine, 10 $\mu$ M desloratadine or 10 $\mu$ M trifluoperazine for 24 hours. \*\*\* $p < 0.001$  by one-way ANOVA with Tukey's correction. Data are representative of 2 independent experiments.
- M) Analysis of the *Arg1* and *Il10* expression in M2-polarized macrophages treated as indicated, as assessed by qRT-PCR. Cells were treated with 40  $\mu$ M imipramine, 10  $\mu$ M desloratadine or 10  $\mu$ M trifluoperazine for 24 hours. \*\*\*\* $p < 0.0001$  by one-way ANOVA with Tukey's correction. Data are representative of 2 independent experiments.
- N) mRNA expression of *Il10*, *Adam10* and *Adam17* in CD11b cells isolated from tumors treated with IM (n=4) or TFP (n=4) or untreated controls (n=5). Statistical analysis by one-way ANOVA. \* $p < 0.05$ .
- O) Sorted microglia and MDMs from untreated or IM-treated PDG glioma tumors assayed with green pHrodo *Staphylococcus aureus* bioparticles to assess their capability for phagocytosis. Data presented as MFI of pHrodo/live cells. Statistical analysis by Mann-Whitney test. \* $p < 0.05$ .

Quantitative data in all relevant panels are presented as mean  $\pm$  SEM.

**A**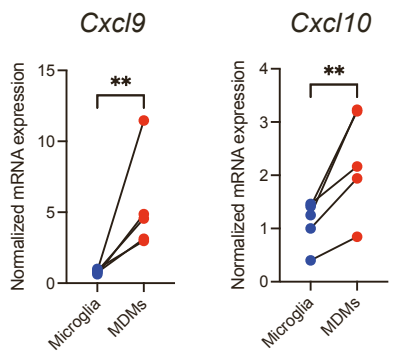**B**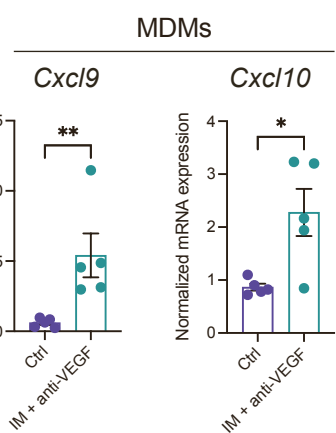**C**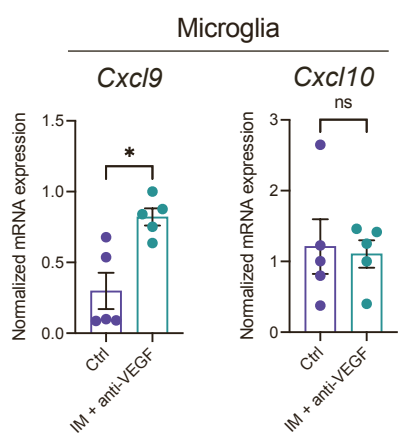**D**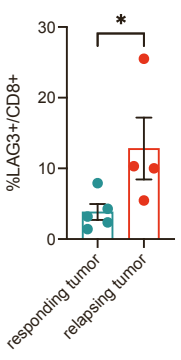**E**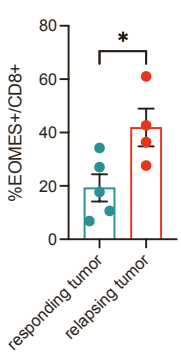**F**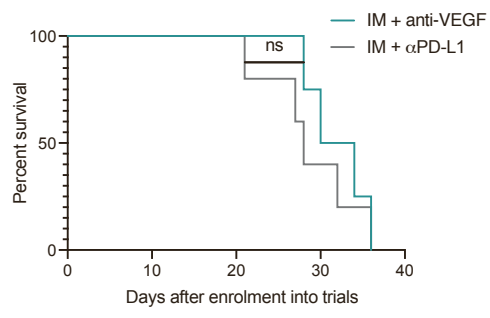

**Fig S6: CXCR3 ligands are also upregulated in proneural (PDG) tumors in response to IM + anti-VEGF, and the combination of IM +  $\alpha$ PD-L1 has a similar therapeutic benefit to IM + anti-VEGF in LVRshp53 animals, related to Fig 6 and Fig 7**

- A) mRNA expression of *Cxcl9* and *Cxcl10* in sorted microglia and MDMs from proneural glioma tumors in PDG transgenic mice treated with IM + anti-VEGF (n=5). Statistical analysis by ratio paired t test. \*\*p<0.01.
- B) mRNA expression of *Cxcl9* and *Cxcl10* in untreated (n=5) or IM + anti-VEGF-treated (n=5) FACS-sorted MDMs from PDG tumors as assessed by qRT-PCR. Statistical analysis by Mann-Whitney test. \*p<0.05, \*\*p<0.01.
- C) mRNA expression of *Cxcl9* and *Cxcl10* in untreated (n=5) or IM + anti-VEGF-treated (n=5) FACS-sorted microglia from PDG tumors as assessed by qRT-PCR. \*p<0.05, ns, no statistical significance by Mann-Whitney test.
- D) Flow cytometry analysis of LAG3 staining in CD8 T cells in responding (n=5) and relapsing tumors (n=4). Statistical analysis by Mann-Whitney test. \*p<0.05.
- E) EOMES expression in CD8 T cells assessed by flow cytometry. Responding tumors (n=5), relapsing tumors (n=4). \*p<0.05 by Mann-Whitney test.
- F) Survival of tumor-bearing LVRshp53 animals subjected to IM + anti-VEGF (n=5) or IM +  $\alpha$ PD-L1 (n=4). Statistical significance by Mantel-Cox test. ns, no statistical significance.

Quantitative data in all relevant panels are presented as mean  $\pm$  SEM.”

Table S1: **List of primers used for qRT-PCR**, related to STAR Methods section RNA isolation, reverse transcription, and quantitative RT-PCR

| Name                          | Forward sequence             | Reverse sequence              |
|-------------------------------|------------------------------|-------------------------------|
| <i>I8s</i>                    | GTAACCCGTTGAACCCATT          | CCATCCAATCGGTAGTAGCG          |
| <i>Gapdh</i>                  | AGGTCGGTGTGAACGGAT           | TGTAGACCATGTAGTTGAGGTC<br>A   |
| <i>Adm</i>                    | CACCCTGATGTTATTGGG           | TTAGCGCCCACTTATTCCACT         |
| <i>Arg1</i>                   | CAGAAGAATGGAAGAGTCAG         | CAGATATGCAGGGAGTCACC          |
| <i>Chil3</i>                  | CAGGTCTGGCAATTCTTCTGA        | GTCTTGCTCATGTGTGTAAGTGA       |
| <i>Mrc1</i>                   | CTCTGTTTCTGCTATTGGACGC       | CGGAATTTCTGGGATTCAGCTTC       |
| <i>Il10</i>                   | GCTCTTACTGACTGGCATGAG        | CGCAGCTCTAGGAGCATGTG          |
| <i>iNos</i>                   | TTTGCTTCCATGCTAATGCGAA<br>AG | GCTCTGTTGAGGTCTAAAGGCT<br>CCG |
| <i>F13a1</i>                  | GAGCAGTCCCGCCCAATAAC         | CCCTCTGCGGACAATCAACTTA        |
| <i>Il1<math>\alpha</math></i> | GCACCTTACACCTACCAGAGT        | AAACTTCTGCCTGACGAGCTT         |
| <i>Cd86</i>                   | TGTTTCCGTGGAGACGCA           | TTGAGCCTTTGTAAATGG            |
| <i>Hrh1</i>                   | CTGGTGCTGTATGCAGTGC          | GCTACCGACAGGCTGACAA           |
| <i>Stab1</i>                  | GGCAGACGGTACGGTCTAAAC        | AGCGGCAGTCCAGAAGTATCT         |
| <i>Il1r2</i>                  | GTTTCTGCTTTCACCACTCCA        | GAGTCCAATTTACTCCAGGTCA<br>G   |
| <i>Cxcl9</i>                  | GGAGTTCGAGGAACCCTAGTG        | GGGATTTGTAGTGGATCGTGC         |
| <i>Cd49d</i>                  | GATGCTGTTGTTGTACTIONCGG      | ACCACTGAGGCATTAGAGAGC         |
| <i>Glycam1</i>                | TCAGCTGCAACCACCTCAG          | TTCGTGATACGACTGGCACC          |
| <i>Icam1</i>                  | GTGATGCTCAGGTATCCA           | CACAGTTCTCAAAGCACA            |
| <i>Vcam1</i>                  | AGTTGGGGATTTCGGTTGTTCT       | CCCCTCATTCTTACCACCC           |
| <i>Irf7</i>                   | GAGACTGGCTATTGGGGGAG         | GACCGAAATGCTTCCAGGG           |
| <i>Cd40</i>                   | TTGTTGACAGCGGTCCATCTA        | GCCATCGTGGAGGTACTGTTT         |
| <i>Ifit1</i>                  | CTGAGATGTCACCTCACATGG<br>AA  | GTGCATCCCCAATGGGTTCT          |
| <i>Mmp2</i>                   | CAAGTTCCCCGGCGATGTC          | TTCTGGTCAAGGTCACCTGTC         |
| <i>Mmp9</i>                   | CTGGACAGCCAGACACTAAAG        | CTCGCGGCAAGTCTTCAGAG          |
| <i>Adam10</i>                 | ATGGTGTGCGGACAGTGTTA         | GTTTGGCACGCTGGTGTTTTT         |



|               |                             |                      |
|---------------|-----------------------------|----------------------|
| <i>Adam17</i> | AGGACGTAATTGAGCGATTTT<br>GG | TGTTATCTGCCAGAACTCCC |
|---------------|-----------------------------|----------------------|
