# Supplementary material for: Cancer cell autophagy, reprogrammed macrophages, and remodeled vasculature in glioblastoma triggers tumor immunity
Source: PubMed Central journal article supplement (PMC9580613; doi:10.1016/j.ccell.2022.08.014), 2022-10-10
Supplement: mmc2.pdf [file mmc2.pdf]

# Cancer cell autophagy, reprogrammed macrophages, and remodeled vasculature in glioblastoma triggers tumor immunity

## Graphical abstract

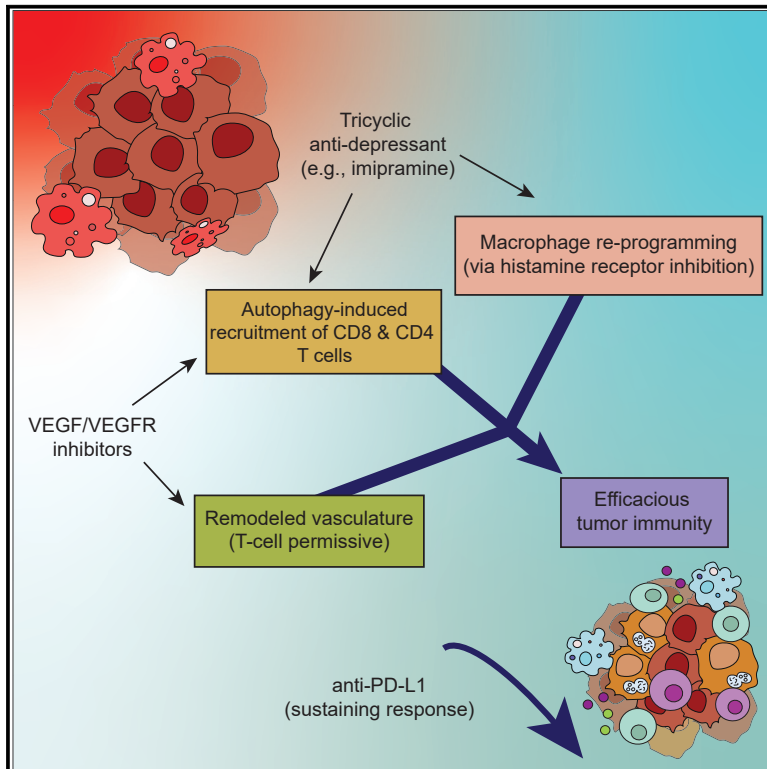

## Authors

Agnieszka Chryplewicz, Julie Scotton, Mélanie Tichet, ..., Johanna A. Joyce, Krisztian Homicsko, Douglas Hanahan

## Correspondence

douglas.hanahan@epfl.ch

## In brief

Chryplewicz et al. describe effects of a tricyclic antidepressant and VEGF inhibitors in glioblastoma. Imipramine increases autophagic flux in cancer cells, which recruits T cells, and reprograms macrophages as pro-inflammatory by inhibiting histamine receptor. VEGF inhibitors remodel tumor vasculature, enabling T cell invasion and activation. The result is immune-dependent therapeutic efficacy, augmentable by anti-PD-L1.

## Highlights

- Combining imipramine (IM) with VEGF pathway inhibitors impairs glioma progression
- IM + anti-VEGF increases autophagic flux and remodels vasculature to promote immunity
- IM reprograms immunosuppressive TAMs by inhibiting histamine receptor signaling
- IM + anti-VEGF therapy sensitizes gliomas to anti-PD-L1 so as to sustain immunity

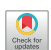

## Article

# Cancer cell autophagy, reprogrammed macrophages, and remodeled vasculature in glioblastoma triggers tumor immunity

Agnieszka Chryplewicz,<sup>1,2</sup> Julie Scotton,<sup>1</sup> Mélanie Tichet,<sup>1,2,3</sup> Anoez Zomer,<sup>2,3</sup> Ksenya Shchors,<sup>1,6</sup> Johanna A. Joyce,<sup>2,3,4,5</sup> Krisztian Homicsko,<sup>2,3,4,5</sup> and Douglas Hanahan<sup>1,2,3,5,7,\*</sup>

<sup>1</sup>Swiss Institute for Experimental Cancer Research (ISREC), School of Life Sciences, Swiss Federal Institute of Technology Lausanne (EPFL), Lausanne, Switzerland

<sup>2</sup>Agora Translational Cancer Research Center, Lausanne, Switzerland

<sup>3</sup>Lausanne Branch, Ludwig Institute for Cancer Research, Lausanne, Switzerland

<sup>4</sup>Department of Oncology, University of Lausanne, Lausanne, Switzerland

<sup>5</sup>Swiss Cancer Center Leman (SCCL), Lausanne/Geneva, Switzerland

<sup>6</sup>Present address: Xyphos-Astellas, South San Francisco, CA, USA

<sup>7</sup>Lead contact

\*Correspondence: [douglas.hanahan@epfl.ch](mailto:douglas.hanahan@epfl.ch)

<https://doi.org/10.1016/j.ccell.2022.08.014>

## SUMMARY

Glioblastoma (GBM) is poorly responsive to therapy and invariably lethal. One conceivable strategy to circumvent this intractability is to co-target distinctive mechanistic components of the disease, aiming to concomitantly disrupt multiple capabilities required for tumor progression and therapeutic resistance. We assessed this concept by combining vascular endothelial growth factor (VEGF) pathway inhibitors that remodel the tumor vasculature with the tricyclic antidepressant imipramine, which enhances autophagy in GBM cancer cells and unexpectedly reprograms immunosuppressive tumor-associated macrophages via inhibition of histamine receptor signaling to become immunostimulatory. While neither drug is efficacious as monotherapy, the combination of imipramine with VEGF pathway inhibitors orchestrates the infiltration and activation of CD8 and CD4 T cells, producing significant therapeutic benefit in several GBM mouse models. Inclusion up front of immune-checkpoint blockade with anti-programmed death-ligand 1 (PD-L1) in eventually relapsing tumors markedly extends survival benefit. The results illustrate the potential of mechanism-guided therapeutic co-targeting of disparate biological vulnerabilities in the tumor microenvironment.

## INTRODUCTION

Glioblastoma (GBM) is an invasive form of brain cancer with a robust vasculature arising via angiogenesis and co-option of normal blood vessels (Ostrom et al., 2018; Xie et al., 2014). Radiotherapy (RT) combined with chemotherapy (temozolomide [TMZ]) is the standard of care, but the relapse-free state is transitory (15 months on average) (Stupp et al., 2005, 2009). The vascular endothelial growth factor (VEGF) blocking antibody bevacizumab is approved, despite a lack of survival benefit, largely due to its effects in reducing edema (Chinot et al., 2014; Gilbert et al., 2014; Li et al., 2017). Other therapeutic agents have been tested, largely to no avail (Pearson and Regad, 2017; Quail and Joyce, 2017; Reardon et al., 2017; Schalper et al., 2019). As such, new treatment strategies are needed.

We have previously reported, using a genetically engineered mouse model of GBM, that two generic drugs can be re-purposed as a novel therapeutic strategy for GBM. The combination of a tricyclic antidepressant (TCA) and an anti-coagulant of a class that inhibits the P2RY<sub>12</sub> receptor hyper-activate already

elevated levels of autophagy in gliomas (Shchors et al., 2015). Their combinatorial benefit is ascribed to concerted elevation autophagy. Imipramine (IM, a TCA) and ticlopidine (TIC, a P2RY<sub>12</sub> inhibitor) produces a significant yet limited survival benefit in glioma-bearing mice. We envisaged that co-targeting distinctive tumor-promoting mechanisms along with autophagy could produce added benefit. We focused on the angiogenic tumor vasculature, reasoning that VEGF pathway inhibitors might have benefit if so combined.

The results presented below reveal remarkable synergies upon combining a re-purposed TCA (imipramine) with drugs that inhibit VEGF-VEGF receptor (VEGFR) signaling.

## RESULTS

The aforementioned study (Shchors et al., 2015) was largely conducted using two genetically engineered mouse models (GEMMs) that differ in suffering heterozygous (GRLp53flhet) or homozygous (GRLp53flko) deletions of the p53 tumor suppressor gene (Figure S1A). While informative, these models have

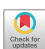

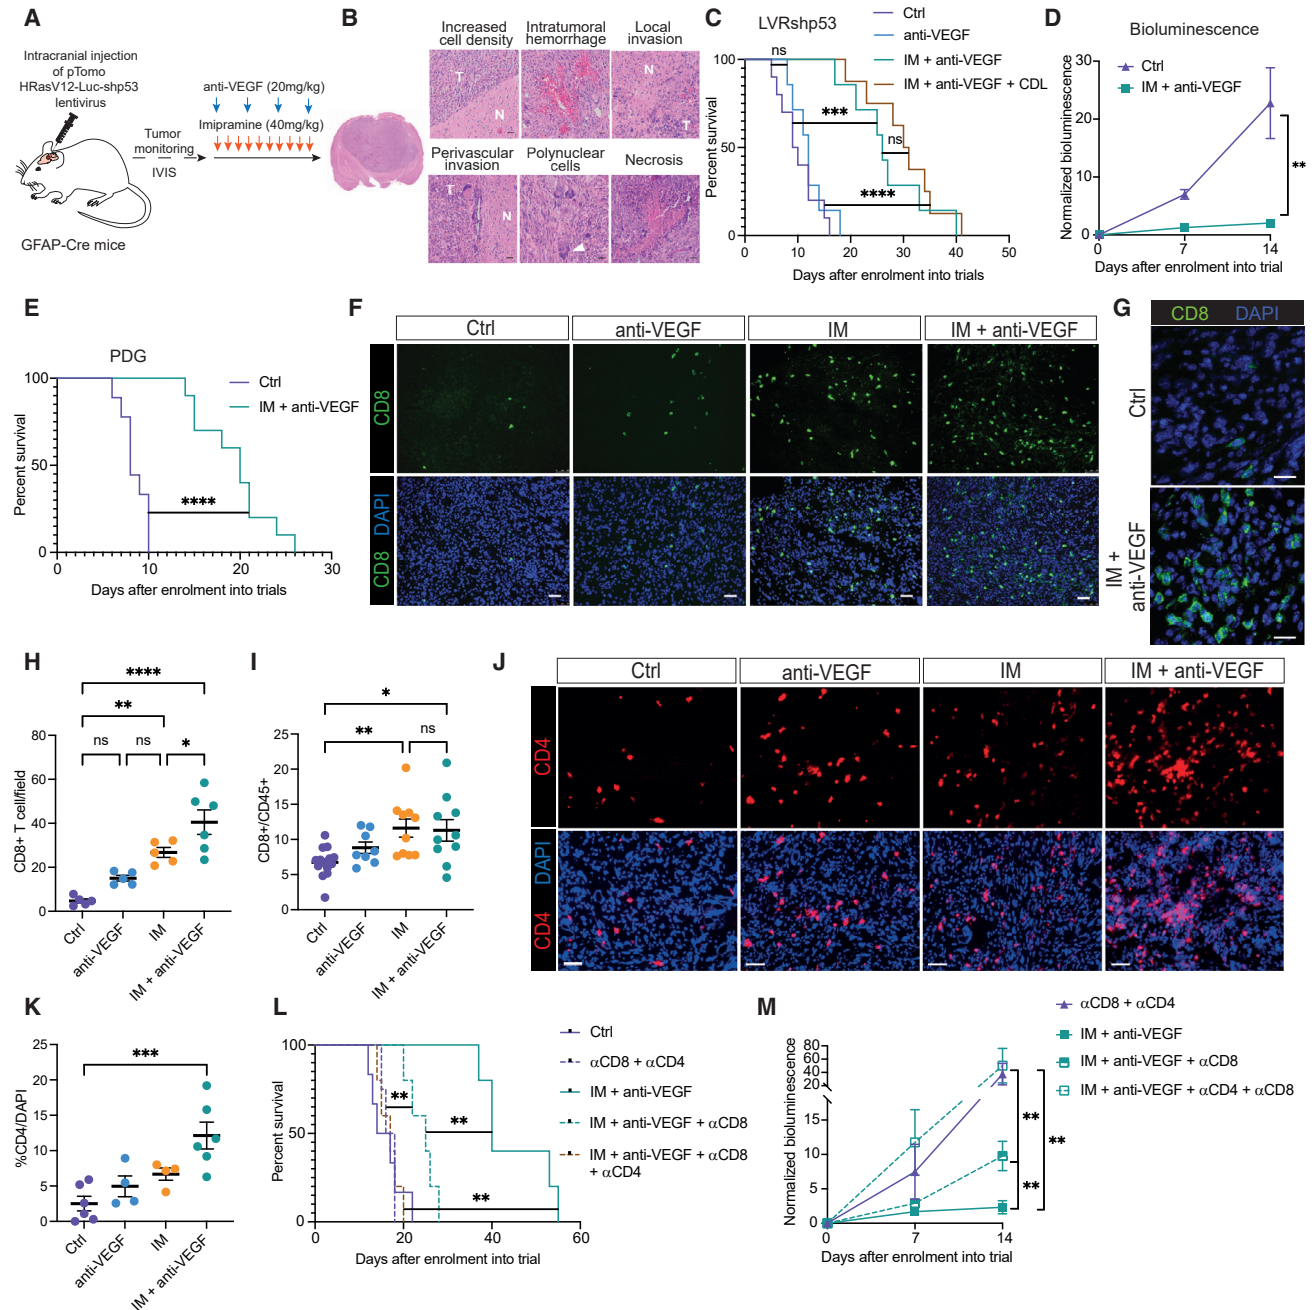

**Figure 1. IM + anti-VEGF prolongs survival of GBM mice and is immunostimulatory**

(A) Schematic of the long-term therapeutic trials in the lentiviral-induced mouse model of glioma.  
 (B) Representative images of H&E-stained tissue sections from a tumor that developed in an end-stage LVRshp53 animal. Scale bar, 30  $\mu$ m. Representative of whole-slide images of three tumors.  
 (C) Survival of tumor-bearing LVRshp53 animals subjected to the indicated treatments. Control (Ctrl) (n = 10), anti-VEGF (n = 7), IM + anti-VEGF (n = 7), IM + anti-VEGF + CDL (n = 8).  
 (D) Normalized bioluminescence in LVRshp53 animals treated as indicated for 2 weeks.  
 (E) Survival of PDG animals subjected to the indicated treatments. Ctrl (n = 9), IM + anti-VEGF (n = 10).  
 (F) Representative images of CD8 (green) and DAPI nuclear staining (blue). Scale bar, 50  $\mu$ m. Image is illustrative of the analysis shown in (H).  
 (G) High-magnification images of CD8 T cells in a Ctrl versus an IM + anti-VEGF-treated tumor. Scale bar, 50  $\mu$ m.  
 (H) Quantification of CD8 T cells in LVRshp53 tumors treated as indicated for 12 days. Each dot indicates the average of 8–12 immuno-stained tumor tissue sections from one mouse.  
 (I) Flow cytometry analysis of CD8 T cells in LVRshp53 tumors treated as indicated for 12 days. Cells were gated as CD45<sup>+</sup>CD3<sup>+</sup>CD8<sup>+</sup>. Ctrl (n = 15), anti-VEGF (n = 8), IM (n = 10), IM + anti-VEGF (n = 10).

(legend continued on next page)

proved cumbersome for pre-clinical trials due to multifocal and temporally variable neoplastic progression. Therefore, we established a mouse model of gliomagenesis (Friedmann-Morvinski et al., 2012; Marumoto et al., 2009) involving stereotactic inoculation into the hippocampus of a lentivirus conditionally expressing an activated HRasV12 oncogene and an shRNA that knocks down expression of the p53 tumor suppressor, along with a luciferase reporter (LVRshp53; Figures 1A and S1B). The recipient mice harbor a GFAP-Cre transgene that activates expression of the lentiviral delivered HRasV12 and luciferase (Friedmann-Morvinski et al., 2012; Marumoto et al., 2009). While Ras genes are infrequently mutated in human GBM (~2%; Prior et al., 2020), the RAS/MAPK pathway is frequently activated via mutational loss of the NF1 tumor suppressor gene (14%–23% of GBM; Philipott et al., 2017). A comparative analysis of mouse GBM elicited by lentiviruses delivering shNF1 versus HRasV12, each along with shp53, revealed similar molecular and pathologic phenotypes (Friedmann-Morvinski et al., 2012). Notably, both of these models (and the aforementioned transgenic models) phenocopy the mesenchymal subtype of human GBM, which is associated with worse outcome and response to therapy (Phillips et al., 2006). Moreover, the HrasV12 shp53 lentivirus-based model has been profiled via single-cell RNA sequencing and shown to be comparable with human GBMs in regard to cellular plasticity, wherein a single glioma can present with multiple cellular states and putative molecular subtypes in varying abundances (Nefitel et al., 2019). Tumors can be monitored non-invasively (Figure S1C), and present with histological features of human GBM (Figure 1B), including high rates of proliferation (Figure S1D) and aberrant vasculature (Figure S1E).

### Assessing the combination of the TCA imipramine and VEGF/VEGFR inhibitors

An initial pilot study investigated the therapeutic efficacy of two VEGFR TKIs, sunitinib and axitinib, alone and in combination with imipramine in the GRLp53flhet transgenic mouse model. Consistent with clinical results (Duerinck et al., 2018; Hutterer et al., 2014), monotherapy with the VEGFR inhibitors had minimal effect: neither improved overall survival (Figure S1F). Interestingly, however, both drugs further enhanced the survival benefit of IM compared with IM monotherapy (Figure S1F) and were well tolerated. Since the anti-VEGF antibody bevacizumab is approved for clinical use in GBM, whereas no VEGFR TKIs are approved, we switched to using an analog of bevacizumab, B20S, that binds to and sequesters mouse VEGF.

Much as for the clinical experience, the anti-VEGF antibody had no survival benefit as monotherapy in the GRLp53flko (Figure S1G) or LVRshp53 (Figure 1C) models. However, as for the VEGFR TKIs, B20S similarly enhanced the therapeutic efficacy of IM with or without inclusion of the P2RY<sub>12</sub> inhibitors ticlopidine (TIC) in the GRLp53flko model (Figure S1G) or clopidogrel (CDL)

in the LVRshp53 model (Figure 1C). The combinatorial treatment of IM + anti-VEGF significantly delayed tumor growth (Figure 1D). In addition, both double and triple combinations of anti-VEGF and IM ± CDL reduced tumor burden (Figure S1H). Motivated by the initial results that VEGFR TKIs also showed combinatorial benefit with IM (Figure S1F), and by the consideration that oral TKIs might in some cases be preferential for patients to the intravenously (i.v.) dosed monoclonal anti-VEGF antibody, we further evaluated axitinib, which is clinically approved for other indications (Motzer et al., 2013). Our results indicate that axitinib has similar survival benefit to anti-VEGF when combined with IM or IM + CDL in the LVRshp53 model (Figures S1I–S1K).

We next asked if the combo treatments were effective in other immunocompetent pre-clinical mouse models of GBM. We first assessed the genetically engineered platelet-derived growth factor-driven (PDG) model of *de novo* gliomagenesis glioma (Hambardzumyan et al., 2016; Pyonteck et al., 2013). IM + anti-VEGF also delayed tumor progression and increased survival benefit in the proneural PDG model (Figures 1E, S1L, and S1M). We also performed trials in the syngeneic GL261 orthotopic transplant model (Szatmári et al., 2006), revealing discernible efficacy for IM as monotherapy, which was enhanced by anti-VEGF (Figure S1N).

We next assessed the levels of autophagy when anti-VEGF was included in the various therapeutic regimens. Interestingly, anti-VEGF alone modestly enhanced autophagy as revealed by co-localization of LC3 and LAMP1, which was further elevated in combinations with IM ± CDL (Figures S2A and S2B). Since IM + TIC elevated levels of autophagy by coordinately increasing the levels of cAMP in gliomas (Shchors et al., 2015), we analyzed combinations with anti-VEGF. Indeed, IM + anti-VEGF elevated cAMP concentrations compared with controls (Figure S2C). Notably, inclusion of the P2RY<sub>12</sub> inhibitor did not further elevate cAMP levels, consistent with its inability to improve upon the survival benefit of IM + anti-VEGF.

### CD8 and CD4 T cells contribute to therapeutic efficacy

Intrigued by reports that autophagy in tumors could be immunogenic (Ladoire et al., 2016a, 2016b; Michaud et al., 2011; Pietrocola et al., 2016), we investigated the possibility that IM ± anti-VEGF therapy might be attracting CD8 T cells, by analyzing tumors from mono- and combination therapy cohorts in LVRshp53 and PDG GBM models. While CD8 T cells were rare in the untreated and anti-VEGF-treated tumors, increased numbers were observed in tumors treated with IM alone, and markedly elevated in the combinatorial arm (Figures 1F–1I, S2D, and S2E). Furthermore, we performed a similar analysis involving axitinib and observed a significant enhancement of CD8 T cell accumulation when combined with IM (Figures S2F and S2G). To begin assessing the possibility that imipramine could have a similar immunostimulatory effect in other tumor

(J and K) Representative images (J) and quantification (K) of CD4 T cells in whole LVRshp53 tumor tissue section. Animals were treated for 12 days. Scale bar, 50 μm. Ctrl (n = 6), anti-VEGF (n = 4), IM (n = 4), IM + anti-VEGF (n = 6).

(L) Assessment of the functional contributions of CD8 and CD4 T cells to survival benefit. Ctrl (n = 6), αCD8 + αCD4 (n = 4), IM + anti-VEGF (n = 5), IM + anti-VEGF + αCD8 + αCD4 (n = 5), IM + anti-VEGF + αCD8 (n = 5).

(M) Normalized bioluminescence in LVRshp53 mice treated as indicated in (L). (Para break) Data in all quantitative panels are shown as mean ± SEM. \*p < 0.05; \*\*p < 0.01; \*\*\*p < 0.001; \*\*\*\*p < 0.0001; ns, no statistical significance. For survival analyses, Mantel-Cox test was performed. Other analyses by Mann-Whitney or one-way ANOVA tests.

types, we treated the iBP2 GEMM of BRAF-driven melanoma (Figure S2H). Monotherapy with imipramine reduced tumor burden (Figure S2I), and similarly induced CD8 T cell infiltration (Figures S2J–S2L).

To ascertain whether induction of CD8 T cell infiltration was connected to increased levels of autophagic flux upon IM + anti-VEGF treatment, we silenced the expression of ATG3, a key regulator of autophagy, in glioma-derived cells, which were implanted into the brains of immunocompetent animals (Figures S2M and S2N). Mice bearing shATG3 gliomas survived similarly to those with control tumors (Figure S2O); indicating that the intrinsic level of autophagy in gliomas was not modulating tumor progression, in contrast to other tumor types (Chavez-Dominguez et al., 2020). However, the survival benefit of mice treated with the IM + anti-VEGF was abrogated in shATG3 tumors (Figure S2O) and associated with reduced CD8 T cell infiltration, in comparison with similarly treated control (ATG3-proficient) tumors (Figures S2P and S2Q), revealing the importance of autophagic flux in CD8 T cell recruitment.

Given the multifaceted roles of CD4 T cells in anti-tumor immune responses (Alspach et al., 2019; Spitzer et al., 2017; Zander et al., 2019), we assessed their presence following the combo therapy. The abundance of CD4 T cells was significantly expanded in double-treated tumors in the LVRshp53 and PDG models (Figures 1I–1K, S2R, and S2S).

We next assessed the functional contributions of CD8 and CD4 T cells to therapeutic efficacy by implanting glioma-derived cells in parallel into syngeneic and immunocompromised mice. Notably, there was no therapeutic response in immunodeficient mice (Figure S2T) compared with syngeneic immunocompetent mice (Figure S2U), emphasizing the role of the adaptive immune system in driving the responses to this regimen. In addition, we included depleting  $\alpha$ CD8  $\pm$   $\alpha$ -CD4 antibodies in IM + anti-VEGF treated LVRshp53 cohorts. Concomitant depletion of CD4 and CD8 T cells (Figure S2V) led to a complete abrogation of the therapeutic benefit of IM + anti-VEGF (Figures 1L and 1M), implicating both T cell subtypes in therapeutic efficacy. In addition, we depleted T cells in tumors treated with our previously reported (Shchors et al., 2015) autophagy-inducing combination of IM and a P2RY<sub>12</sub> inhibitor, which also negated therapeutic efficacy (Figure S2W), further linking the therapeutic benefit of imipramine with autophagy-dependent recruitment of CD8 and CD4 T cells.

We next characterized the CD8 T cells populating GBM tumors, and found a modest increase in CD62L-CD44<sup>+</sup> effector cells in anti-VEGF-treated tumors, which were significantly expanded upon dual therapy compared with untreated and IM-monotherapy arms (Figure 2A). The activation marker interferon gamma (IFN $\gamma$ ) was significantly increased in the combo arm, as well as in the anti-VEGF-alone arm (Figure 2B). TNF $\alpha$  and Granzyme B (GzB) were also expressed at higher levels in IM + anti-VEGF-treated tumors and trended toward higher levels in the anti-VEGF-alone arm, compared with untreated or IM-treated tumors (Figures 2C and 2D). Similar to the mesenchymal GBM model, these markers were also elevated in proneural tumors treated with the IM + anti-VEGF regimen compared with controls and with monotherapy with IM (Figures S3A–S3C).

To assess the functional contribution of IFN $\gamma$  expression in CD8 T cells to the efficacy of the IM + anti-VEGF combo, we included

an IFN $\gamma$ -blocking antibody in the therapeutic regimen. Blockade of IFN $\gamma$  significantly reversed therapeutic efficacy (Figure 2E), establishing that activation of IFN $\gamma$  signaling in CD8 T cells was integral to the anti-tumoral responses evoked by IM + anti-VEGF.

In addition, the proliferative phenotype of CD8 T cells was increased in tumors treated with the double combination, as assessed by Ki67 expression and STAT5 phosphorylation (Figures 2F and 2G). Recently, TCF1 has been described as a marker of a stem-cell-like subset of CD8 T cells associated with improved anti-tumor immunity and response to immune-checkpoint blockade (Sade-Feldman et al., 2018; Siddiqui et al., 2019). We found that CD8 T cells were highly expressing TCF1 upon IM + anti-VEGF therapy (Figure 2H). Interestingly, the VEGF inhibitory component of the combo regimen was primarily responsible for the induction of proliferative and stem-like CD8 T cells (Figures 2F–2H). Guided by reports that anti-VEGF therapy increases hypoxia within viable tumor areas (Franco et al., 2006; Shi et al., 2017) and that low oxygen bioavailability enhances the cytotoxic function of CD8 T cells (de Almeida et al., 2020; Doedens et al., 2013), we found increased tumor hypoxia and accumulation of CD8 T cells within hypoxic regions (Figures 2I and 2J). Moreover, CD8 T cells from the anti-VEGF arm expressed higher levels of the hypoxia-inducible factor HIF-1 $\alpha$  (Figure 2K). The results are congruent with a report that hypoxia activates effector functions of CTLs (de Almeida et al., 2020; Xu et al., 2016).

Given that CTLs can trigger apoptosis, combo-treated tumors treated were assessed by immunostaining for cleaved caspase 3 (CC3), which is diagnostic of ongoing apoptosis. The cohorts treated with IM + anti-VEGF evidenced elevated levels of CC3 (Figures S3D and S3E). The observed apoptosis was CD8 dependent, as the levels of CC3 were reduced when aCD8 was used to deplete CTLs in these cohorts (Figures S3F and S3G).

Since CD4 T cells are highly versatile and play important roles in coordinating immune responses, we assessed their functions. We found that CD4 T cells present in the untreated tumors were of the regulatory (Treg) phenotype that expressed transforming growth factor beta (TGF $\beta$ ), a cytokine broadly implicated in immunosuppression (Figures 2L and 2M). Treatment with IM + anti-VEGF decreased intra-tumoral Tregs and levels of TGF $\beta$  (Figures 2L and 2M). We next performed a short-term *in vivo* depletion of CD4 T cells to assess conventional T-helper function, which revealed decreased CD8 T cell numbers concomitant with reduced expression of IFN $\gamma$  and GzB (Figures S3H–S3J). Noting that CD4 T cells are also capable of direct cytotoxicity against tumor cells (Oh et al., 2020, p. 4; Quezada et al., 2010), we assessed markers linked to cytotoxic function in CD4 T cells (Cachot et al., 2021), revealing higher expression of SLAMF7 and GzB within this population recruited by the dual combinatorial therapy, indicative of their cytotoxic potential (Figures 2N and 2O).

In sum, the results indicate that the combination of IM + anti-VEGF is immunostimulatory and that both CD8 and CD4 T cells are cooperatively contributing to therapeutically effective immune responses in mouse models of GBM.

### Tumor vascularity is reduced and remodeled in the IM + anti-VEGF-based combinations

The density and integrity of the angiogenic and morphologically aberrant tumor vasculature in GBM were assessed in cohorts of

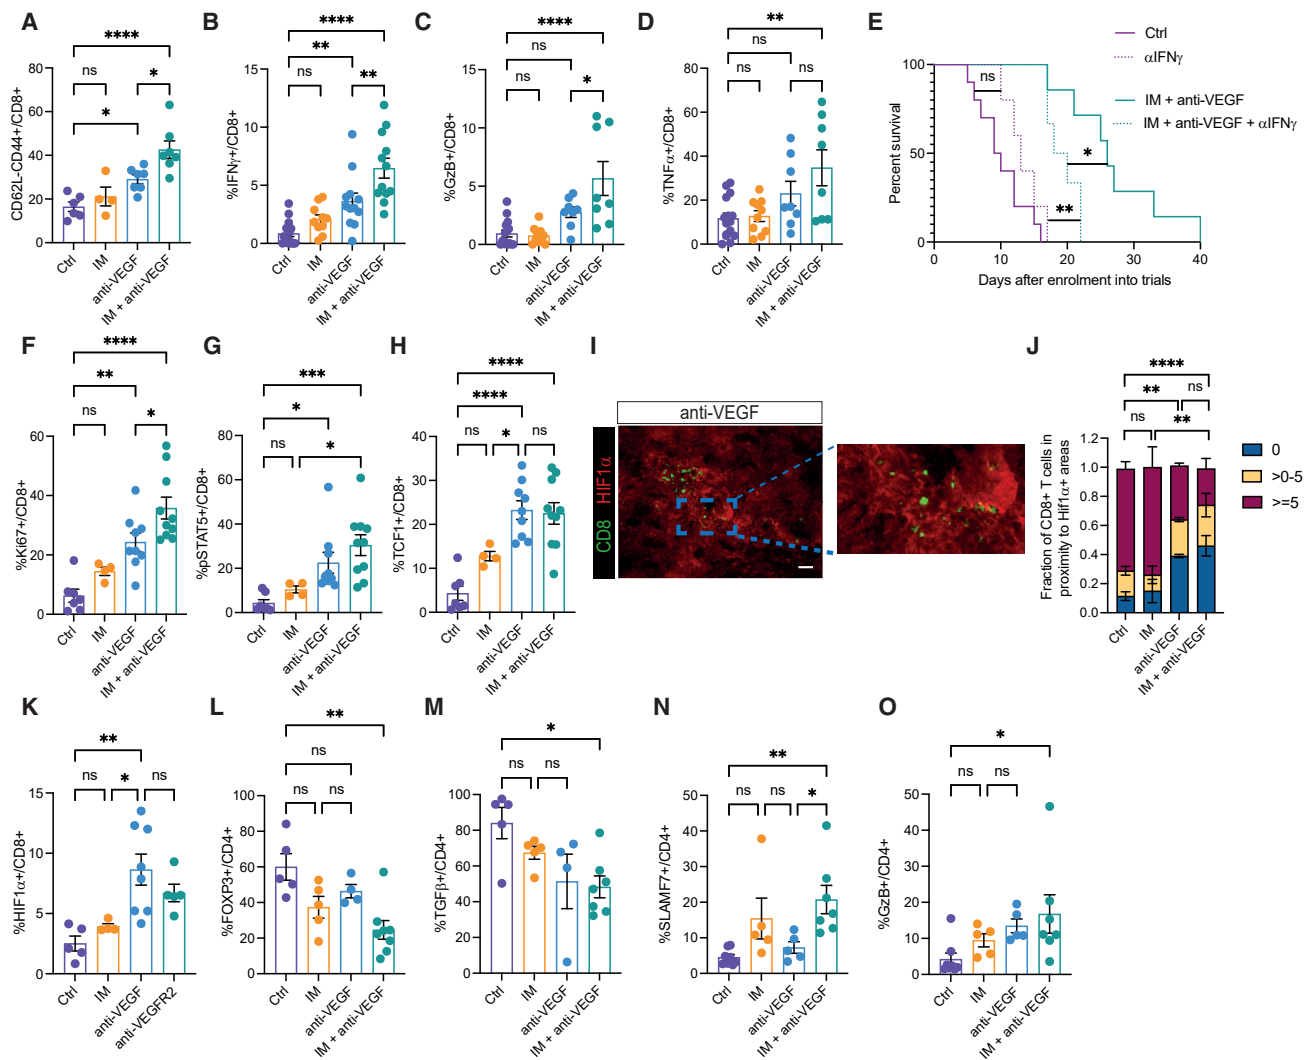

**Figure 2. CD8 and CD4 T cells are activated upon IM + anti-VEGF treatment**

(A) Flow cytometry analysis of effector T cells (CD62L-CD44<sup>+</sup>). Ctrl (n = 6), IM (n = 4), anti-VEGF (n = 7), and IM + anti-VEGF (n = 7).  
 (B) FACS analysis of IFN $\gamma$  intracellular staining in fixed and permeabilized CD8+T cells. Ctrl (n = 16), IM (n = 10), anti-VEGF (n = 12), IM + anti-VEGF (n = 12).  
 (C and D) Flow cytometry analysis of GzB (C) and TNF $\alpha$  (D) intracellular staining in CD8 T cells. Ctrl (n = 15), IM (n = 10), anti-VEGF (n = 8), IM + anti-VEGF (n = 8).  
 (E) Functional importance of IFN $\gamma$  for the survival of LVRshp53 animals subjected to the indicated treatments. Ctrl (n = 9), anti-IFN $\gamma$  (n = 5), IM + anti-VEGF (n = 7), IM + anti-VEGF + anti-IFN $\gamma$  (n = 6). Statistical analysis by Mantel-Cox test.  
 (F, G, and H) Flow cytometry analysis of Ki67 (F), pSTAT5 (G), and TCF1 (H) in CD8 T cells. Ctrl (n = 7), IM (n = 4), anti-VEGF (n = 9), and IM + anti-VEGF (n = 10).  
 (I) Representative image of HIF-1 $\alpha$  (red) and CD8 (green) in the anti-VEGF-treated tumor. Image is illustrative of the analysis performed in (J). Scale bar, 50  $\mu$ m  
 (J) Quantification of the proximity of CD8+ T cells to hypoxic regions in the entire area of full sections of GBM tumors. The zones were divided into 0  $\mu$ m (i.e., within the HIF-1 $\alpha$ + zone), >0 and <5  $\mu$ m, and >5  $\mu$ m separating T cells and HIF-1 $\alpha$ + regions. Ctrl (n = 11), IM (n = 4), anti-VEGF (n = 4), IM + anti-VEGF (n = 5).  
 (K) Flow cytometry analysis of intracellular HIF-1 $\alpha$  expression in fixed and permeabilized CD8 T cells. Ctrl (n = 5), IM (n = 4), anti-VEGF (n = 8), anti-VEGFR2 (n = 5).  
 (L) Flow cytometry analysis of intracellular FOXP3 expression in CD4 T cells. Ctrl (n = 5), IM (n = 5), anti-VEGF (n = 4), IM + anti-VEGF (n = 8).  
 (M) Flow cytometry analysis of intracellular TGF $\beta$  expression in CD4 T cells. Ctrl (n = 5), IM (n = 5), anti-VEGF (n = 4), IM + anti-VEGF (n = 7).  
 (N and O) Flow cytometry analysis of SLAMF7 (N) and GzB (O) expression in CD4 T cells. Ctrl (n = 8), IM (n = 5), anti-VEGF (n = 5), IM + anti-VEGF (n = 7). (Para break) Data in all quantitative panels are shown as mean  $\pm$  SEM. \*p < 0.05; \*\*p < 0.01; \*\*\*p < 0.001; \*\*\*\*p < 0.0001; ns, no statistical significance. Statistical analysis by one-way ANOVA, unless otherwise indicated.

mice treated with anti-VEGF, IM + anti-VEGF, and IM + anti-VEGF + CDL. Despite a lack of survival benefit, monotherapy with anti-VEGF significantly reduced the density of CD31<sup>+</sup> blood vessels in tumors; the inclusion of IM had no effect (Figures 3A and 3B), although endothelial cells were more distant from hypoxic areas in tissues treated with the dual therapy (Figure S4A).

Vascular functionality and integrity, as measured by fluorescein-labeled lectin perfusion and pericyte coverage, respectively, were improved by anti-VEGF alone and further enhanced with IM (Figures 3C–3E). Addition of CDL did not alter vascular functionality, although it increased coverage by mature pericytes (Figures S4B–S4E) (Song et al., 2005). Such pseudo-normality is

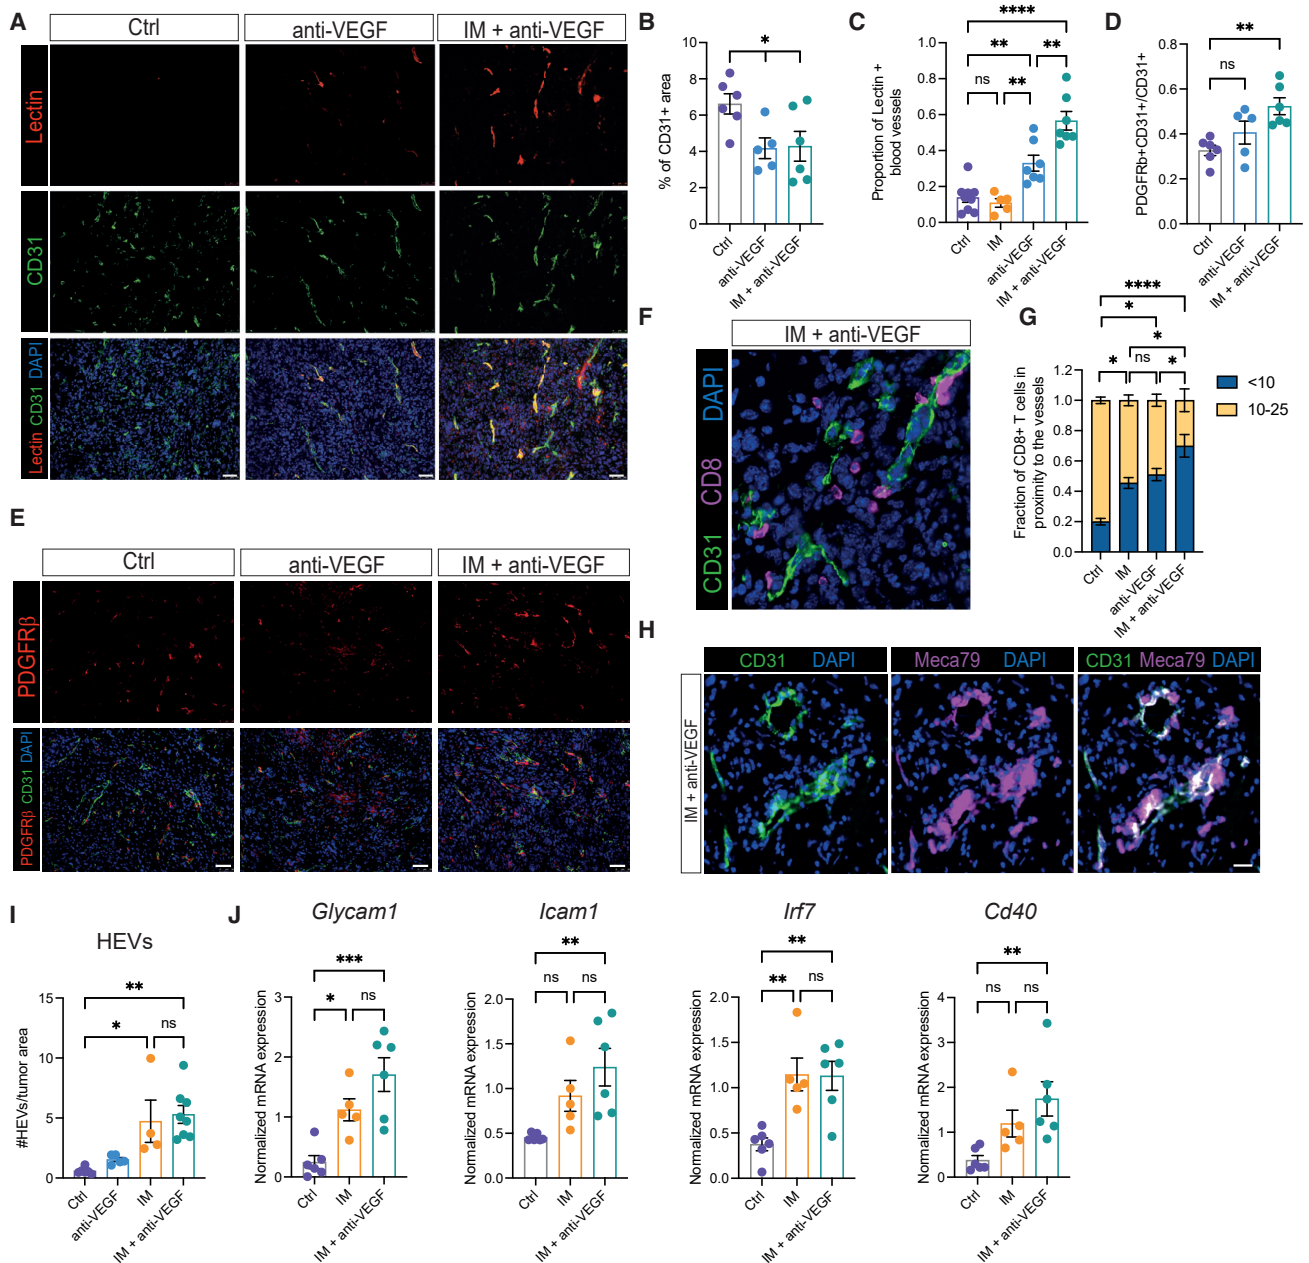

**Figure 3. Anti-VEGF alone and in combination with IM remodels the glioblastoma tumor vasculature**

(A) Representative images of systemically perfused lectin (red), CD31 (green), and DAPI (blue) of LVRshp53 tumors treated as indicated for 1 week. Images are illustrative of the analysis shown in (B) and (C). Scale bar, 50  $\mu$ m

(B) Percentage of CD31<sup>+</sup> area in LVRshp53 tumors treated as indicated for 1 week. Each dot indicates the average of 8–12 fields in tissue sections from a GBM tumor from one mouse. Ctrl (n = 6 tumors), anti-VEGF (n = 5), IM + anti-VEGF (n = 6).

(C) Proportion of i.v.-infused lectin and CD31 co-localization as a percentage of CD31<sup>+</sup> area. Each dot indicates the average of 8–12 fields in tissue sections from a GBM tumor from one mouse (n = 5–6 tumors for each group).

(D and E) Quantification (D) and representative images (E) of PDGFR $\beta$  and CD31 co-localization as a percentage of CD31-positive area. Each dot indicates the average of 8–12 fields in tissue sections from a GBM tumor (n = 5–6 tumors for each group). Scale bar, 50  $\mu$ m.

(F and G) Representative image (F) and quantification (G) of a fraction of CD8<sup>+</sup> T cells located within 10  $\mu$ m or beyond (10–25  $\mu$ m) the closest CD31<sup>+</sup> blood vessel in the entire area of the GBM tumor section. Ctrl (n = 6), IM (n = 4), anti-VEGF (n = 6) and IM + anti-VEGF (n = 6). Scale bar, 50  $\mu$ m.

(H and I) Representative immunofluorescence (H) of Meca79 (magenta), CD31 (green), and DAPI (blue) and HEVs quantification (I) in the entire area of a full tumor tissue section. Ctrl (n = 6), anti-VEGF (n = 5), IM (n = 4), IM + anti-VEGF (n = 8). Scale bar, 20  $\mu$ m.

(J) mRNA expression of endothelial cell markers. Data are normalized to 18S RNA. (Para break) Data in all quantitative panels are presented as mean  $\pm$  SEM. \*p < 0.05; \*\*p < 0.01; \*\*\*p < 0.001; \*\*\*\*p < 0.0001; ns, no statistical significance. Statistical analysis by one-way ANOVA, unless otherwise indicated.

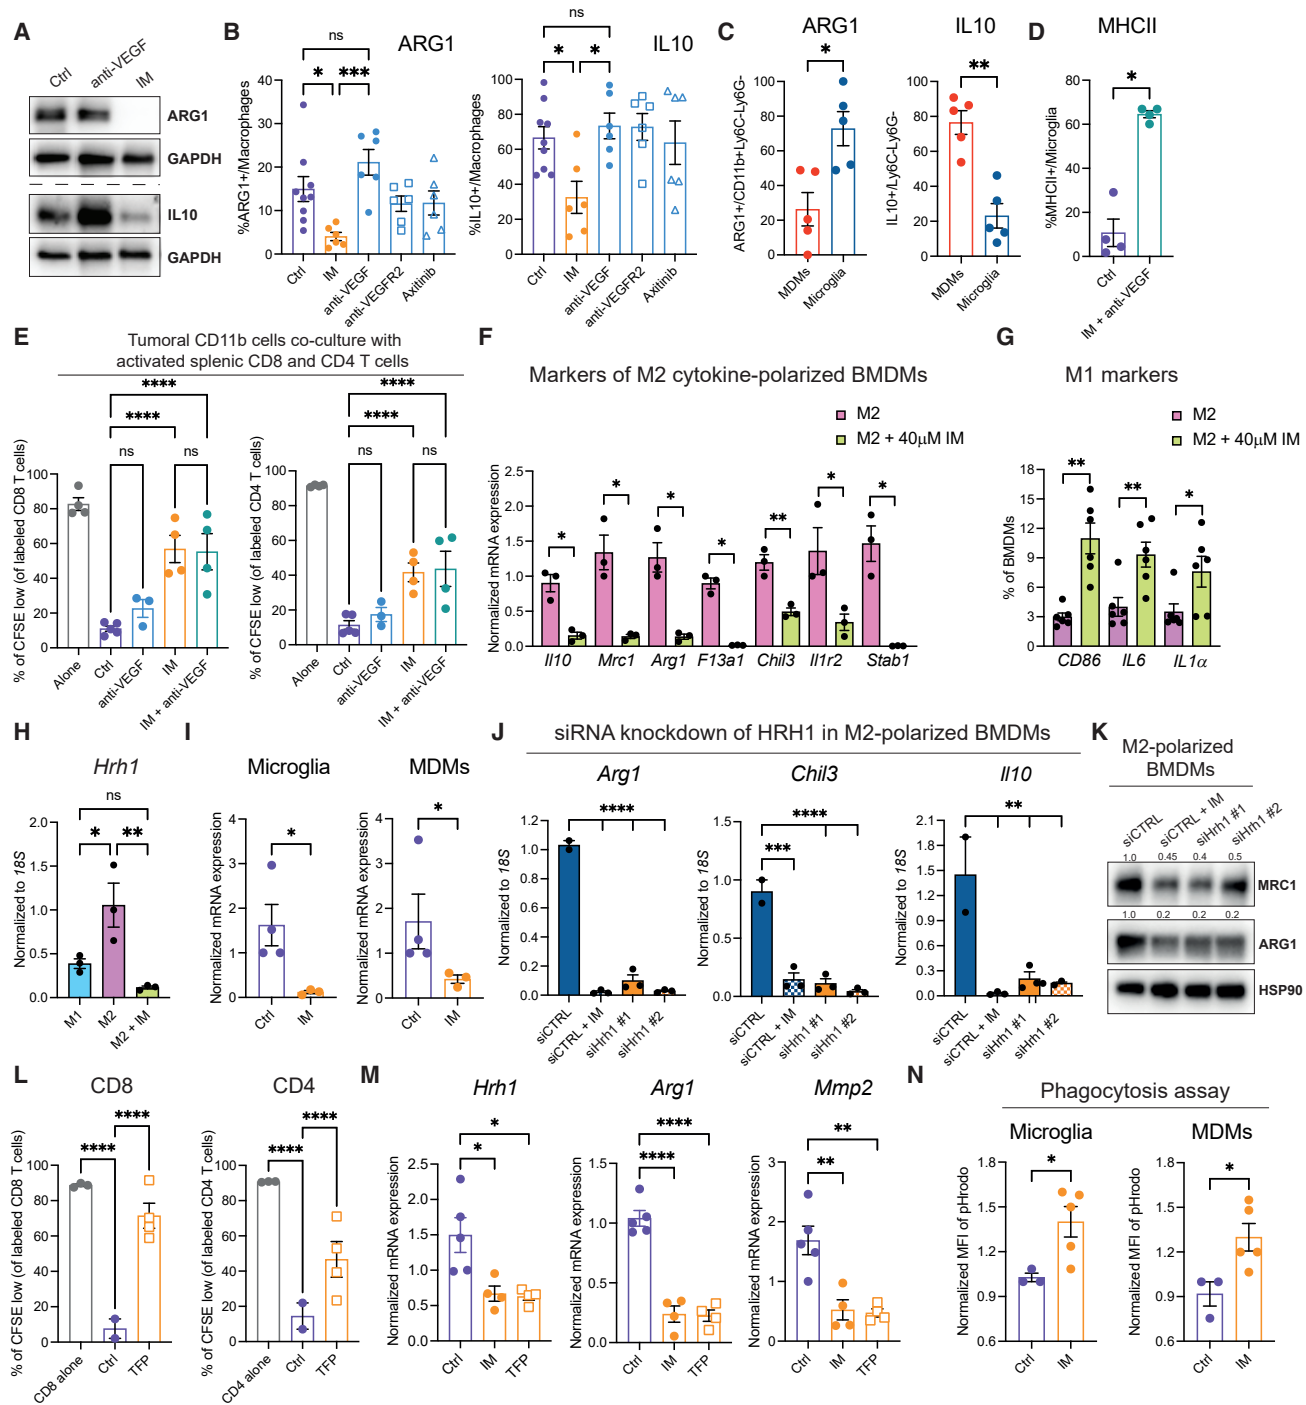

**Figure 4. Imipramine downregulates an M2-like program in TAMs**

(A) Western blot analysis of ARG1 and IL-10 in single tumors treated or not with IM or anti-VEGF.  
 (B) Flow cytometry analysis of ARG1 and IL-10 expression in GBM tumors treated for 1 week. Ctrl (n = 9 tumors), IM (n = 6), anti-VEGF (n = 6), anti-VEGFR2 (n = 6), Axitinib (n = 6). Macrophages were gated as CD45<sup>+</sup>CD11b<sup>+</sup>Ly6C<sup>-</sup>Ly6G<sup>-</sup>.  
 (C) Expression of ARG1 and IL-10 in microglia (CD49d<sup>-</sup>) and MDMs (CD49d<sup>+</sup>) assessed by FACS in untreated tumors (n = 5).  
 (D) Expression of MHC-II within microglia as assessed by flow cytometry. Ctrl (n = 4 tumors) and IM + anti-VEGF (n = 4).  
 (E) *Ex vivo* co-cultures of tumoral CD11b cells and activated splenic CFSE-labeled CD8 or CD4 T cells. Each dot represents the average of two or three technical replicates. T cells alone (n = 4), Ctrl co-culture (n = 5), anti-VEGF (n = 3), IM (n = 4), IM + anti-VEGF (n = 4).  
 (F) Analysis of the M2-like program in cytokine-polarized macrophages as assessed by qRT-PCR analysis of Ctrl and IM-treated M2-like BMDMs. Expression is normalized to 18S statistics by Welch's t test. Each dot represents an individual sample. Data are representative of three independent experiments.  
 (G) Analysis of the M1-like program in BMDMs assessed by FACS. Each dot represents an individual replicate.

(legend continued on next page)



associated with an increased capability of CD8 T cells to extravasate into tumors (Allen et al., 2017). We therefore analyzed the spatial distribution of CD8 T cells in GBM tumors and found a subset to be preferentially localized close to the blood vessels in IM-treated tumors. This effect was further enhanced when anti-VEGF was included (Figures 3F and 3G). Notably, T cells also localize to hypoxic regions, as shown in Figure 2J. These data suggest that the processes of T cell intravasation across the functionally remodeled vasculature and hypoxia-dependent T cell activation could constitute spatially distinct stages in the induction of an efficacious anti-tumoral immune response. In addition, we assessed the formation of high endothelial venules (HEVs) on the vasculature, known to promote recruitment of lymphocytes into tissues during inflammatory responses (Sautès-Fridman et al., 2019). We observed MECA79+ vessels displaying the distinctive morphological features of HEVs scattered throughout tumors treated with IM + anti-VEGF in both LVRshp53 and PDG models (Figures 3H, S4F and S4G). Imipramine was the necessary component for induction of HEVs (Figure 3I). Concordantly, immunohistochemical analysis of melanoma tumors treated with IM monotherapy also revealed the presence of HEVs, which we envisage contribute to the similarly robust CD8 T cell influx elicited in this very different tumor type (Figures S4H and S4I). In addition to histological analyses, we isolated CD31+ cells from GBM and melanoma tumors using magnetic beads and performed transcriptional profiling. We found that, upon treatment with IM ± anti-VEGF, tumor endothelial cells expressed higher levels of *Glycam1*, which is expressed in mature HEVs (Figures 3J, S4J, and S4K). In addition, we observed increased expression of pro-inflammatory mediators (e.g., *Icam1*, *Cd40*, *Irf7*) in tumor endothelial cells from both mesenchymal and proneural GBM tumors as well as in melanoma (Figures 3J, S4J and S4K), consistent with more efficient T cell trafficking and suggestive of their contributions to potent anti-tumor immunity.

### Imipramine reprograms tumor-associated macrophages

In GBM, tumor-associated macrophages (TAMs), arising both from monocyte-derived macrophages (MDMs) and resident microglia, are pro-tumorigenic and associated with immunosuppression (Bowman et al., 2016; Hambardzumyan et al., 2016; Hussain et al., 2006). We therefore investigated whether TAM polarization was altered in treated tumors, initially by assessing expression of markers associated with an M2-like, tumor-promoting phenotype (Pyonteck et al., 2013). We found that treatment of gliomas with imipramine but not antiangiogenic agents downregulated an M2-like program, as assessed in bulk tumors

and specifically in the total macrophage population in LVRshp53 and PDG models (Figures 4A and 4B, and S5A–S5C). Given that tumor-associated microglia and MDMs each contribute to the immunosuppressive microenvironment in GBM and yet have different transcriptional programs (Klemm et al., 2020), we evaluated the expression of M2-like markers in each cell type. Interestingly, we found interleukin (IL)-10 to be predominantly expressed by MDMs, whereas Arg-1 was significantly higher in microglia (Figure 4C). In addition, we observed major histocompatibility complex (MHC)-II upregulation within the microglial compartment upon IM + anti-VEGF treatment (Figure 4D), possibly facilitating the activation of CD4 T cells.

To functionally assess the inferred reprogramming of TAMs away from an immunosuppressive phenotype, we performed an *ex vivo* assay wherein tumoral CD11b+ cells were co-cultured with activated but antigen-nonspecific T cells, to assess T cell proliferation without the complexity of concomitant antigen-specific killing. The myeloid cells isolated from the untreated and anti-VEGF-treated tumors suppressed CD8 and CD4 T cell proliferation. In contrast, those from IM-treated tumors were significantly less inhibitory (Figure 4E). The combination of anti-VEGF did not alter the effect of IM alone (Figure 4E).

To ascertain if the effects of imipramine were direct, we differentiated bone marrow-derived macrophages (BMDMs) *ex vivo* into M2-like macrophages by subjecting them to polarizing cytokines. IM decreased expression of M2-like signature genes (Figures 4F and S5E), accompanied by increased expression of M1-like markers (Figure 4G). To further investigate the reprogramming capabilities of imipramine, we established a Transwell-based co-culture assay using BMDMs and cancer cells derived from tumors of glioma-bearing mice. Co-cultures of BMDMs with cancer cells induced an M2-like phenotype in macrophages that was diminished upon IM treatment (Figure S5F), concomitant with induction of an M1-like program (Figure S5G).

We further sought to illuminate how imipramine acts mechanistically on macrophages. Our previous publication (Shchors et al., 2015) reported that the combination of IM + TIC promoted autophagic flux via the EPAC branch of the cAMP signaling pathway. However, we excluded cAMP signaling in macrophages as the signaling mechanism herein, in experiments involving EPAC-1/2 inhibitors (Figures S5H and S5I). In recent years, neurotransmitters and their respective receptors have emerged as an important component of the tumor microenvironment that contributes to malignant phenotypes in a variety of cancers (Boilly et al., 2017; Hanoun et al., 2015). Given its role as an antidepressant, we reasoned that imipramine might be affecting neurotransmitter signaling circuits within the myeloid population, thereby promoting pro-inflammatory responses in

(H) Expression of *Hrh1* mRNA normalized to *18S* in *ex vivo* M1- and M2-polarized BMDMs, either untreated or IM treated for 24 h. Each dot represents an individual sample. Data are representative of three independent experiments.

(I) mRNA expression of *Hrh1* in FACS-sorted microglia or MDMs from Ctrl and IM-treated tumors.

(J) mRNA expression of *Arg1*, *Chil3*, and *I10* in M2-polarized macrophages that were transfected with *siCtrl* or two different *siHrh1* constructs. Cells were treated with 40  $\mu$ M IM for 24 h. Data are representative of two independent experiments.

(K) Western blot analysis of MRC1 and ARG1 expression of siRNA-transfected M2 BMDMs. Data are representative of two independent experiments.

(L) CD8 and CD4 T cell proliferation during co-culture with tumoral CD11b cells isolated from untreated ( $n = 2$ ) or TFP-treated tumors ( $n = 4$ ).

(M) mRNA expression of *Hrh1*, *Arg1*, and *MMP2* in CD11b cells isolated from tumors treated with IM ( $n = 4$ ), TFP ( $n = 4$ ), or untreated Ctrl ( $n = 5$ ).

(N) Phagocytosis assay involving sorted microglia and MDMs from untreated or IM-treated tumors assayed with green pHrodo *S. aureus* bioparticles. Data presented as mean fluorescence intensity (MFI) of pHrodo/live cells. (Para break) Data in all quantitative panels are presented as mean ± SEM \* $p < 0.05$ ; \*\* $p < 0.01$ ; \*\*\* $p < 0.001$ ; \*\*\*\* $p < 0.0001$ ; ns, no statistical significance. Statistical analysis by Mann-Whitney test or one-way ANOVA, unless otherwise stated.

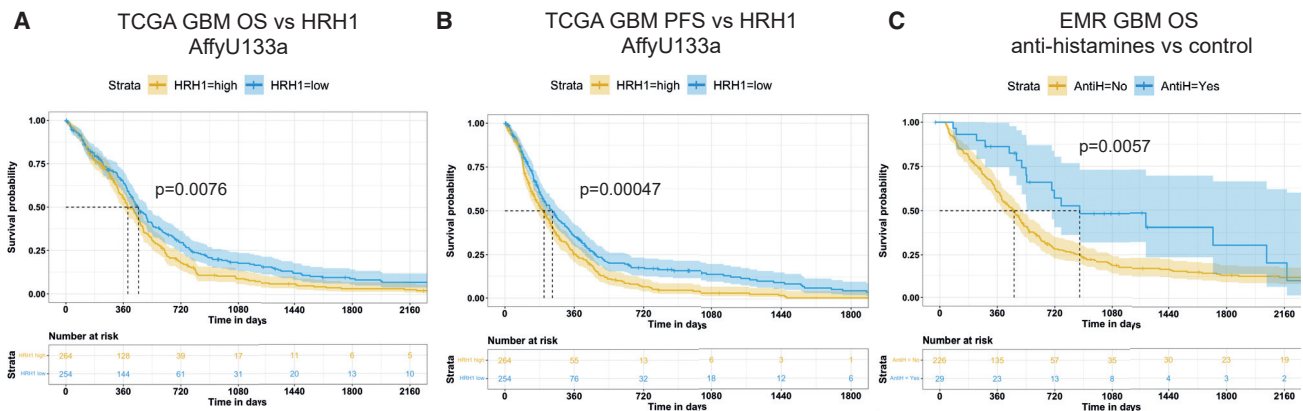

**Figure 5. Low HRH1 expression is associated with better survival, and antihistamine treatment is prognostic in GBM patients**

(A and B) Kaplan-Meier overall survival (A) and progression-free survival (B) analyses of TCGA GBM cohort analyzed with the AffyU133a expression array (n = 539). The blue and yellow shades correspond to the 95% confidence intervals. Patients were split by median expression. p values were calculated based on the Cox proportional hazard model.

(C) Kaplan-Meier estimate of the overall survival of GBM patients from a single center who received antihistamine treatment (n = 29, blue curve) or not (n = 226, yellow curve). The shades correspond to the 95% confidence intervals. The analysis was performed with the Mantel-Cox log-rank test.

GBM. We therefore compared the expression of a series of neuronal signals, focusing on receptors for dopamine, serotonin, histamine, and acetylcholine, in the untreated and IM-treated M2-polarized BMDMs. We found the H1 histamine receptor (*Hrh1*) to be significantly upregulated in the M2-like compared with M1-like BMDMs, and markedly downregulated in response to imipramine treatment, reaching the low levels observed in M1-polarized BMDMs (Figure 4H). We further assessed the expression of *Hrh1* in sorted microglia and BMDMs defined as CD49d<sup>-</sup> and CD49d<sup>+</sup>, respectively (Bowman et al., 2016), and found the histamine receptor to be similarly downregulated by imipramine in both populations of TAMs (Figure 4I). Histamine has been previously shown to induce the upregulation of both mRNA levels and signaling activity of its receptor, and HRH1 antagonists concomitantly suppress both *Hrh1* gene transcription and receptor signaling (Das et al., 2007). To functionally assess this implicated mechanism, we knocked down the expression of *Hrh1* mRNA with siRNAs and found that *siHrh1*-transfected M2-polarized macrophages resembled the expression profile of similarly polarized imipramine-treated BMDMs (Figures 4J and 4K). Conversely, when the M1-polarized macrophages were treated with histamine, we observed a decrease in the expression of M1-like markers (Figure S5J) and an increase in immunosuppressive Arg1 protein levels (Figure S5K). In addition, we evaluated other generic HRH1 antagonists. Both desloratadine and trifluoperazine (TFP) decreased the expression of *Hrh1* in M2-polarized BMDMs to a similar degree as IM, and further reduced the levels of Arg1 and Il10 (Figures S5L and S5M). This pro-inflammatory effect was confirmed *in vivo* with a short-term treatment of GBM-bearing mice with TFP. Isolated myeloid cells were less inhibitory of T cell proliferation compared with untreated controls and presented with a significantly lower expression of immunosuppressive and pro-tumoral markers, combined with a lower expression of *Hrh1* (Figures 4M and S5N), similar to IM-treated tumors. As such, these data reveal the histamine neurotransmitter system to be involved in the suppression of adaptive immunity in GBM.

Finally, we assessed the phagocytic activity of IM-reprogrammed TAMs as a functional component of their immunostimulatory phenotype, given that phagocytic activity has been associated with the capacity to cross-present tumor antigens to CD8<sup>+</sup> T cells (Tseng et al., 2013, p. 47; von Roemeling et al., 2020). We conducted an *ex vivo* phagocytosis assay with GFP + *Staphylococcus aureus* bioparticles on sorted microglia and MDMs. Treatment with IM contributed to a significant increase in phagocytosis levels in both macrophage subtypes populating tumors in the mesenchymal (LVRshp53) and proneural (PDG) models (Figures 4N and S5O).

Collectively, the data indicate that treatment with imipramine reprograms—via inhibiting the histamine receptor *Hrh1*—both subtypes of glioma TAMs away from an M2-like immunosuppressive phenotype, thereby functionally contributing to the observed therapeutic benefit of imipramine in combination with VEGF inhibition.

### Associations of antihistamines in the prognosis of human GBM

Considering the implication that HRH1 signaling was programming TAMs in GBM, we evaluated the survival of human GBM patients as a function of differential expression of *HRH1* or of chronic treatment with antihistamines that inhibit HRH1 signaling. First, we queried The Cancer Genome Atlas (TCGA) to determine if the expression of *HRH1* could be associated with differential patient outcomes. Kaplan-Meier survival analysis indicated significantly improved overall survival (Figure 5A) and progression-free survival (Figure 5B) in GBM patients characterized by low tumoral *HRH1* expression. Interestingly, it has recently been reported that patients with melanoma and lung cancer taking antihistamines during ICB treatment exhibited improved responses compared with those who did not (Li et al., 2022). To assess effects of antihistamine use on responses in GBM patients, we analyzed electronic medical records (ERMs) of the University Hospital of Lausanne (CHUV). We found that patients who received antihistamines prior to and during the course

of the disease showed a significant reduction in the death rate compared with those who did not (Figure 5C). These data implicate HRH1 signaling in human GBM, consistent with the ascribed mechanism of action of imipramine as an HRH1 inhibitor in mouse GBM models. Interestingly, although a cohort of chronically depressed patients on long-term TCA treatment had a reduced incidence of GBM (Walker et al., 2011), patients with GBM who began taking TCAs post-diagnosis did not show an association with survival, consistent with the lack of appreciable survival benefit of IM monotherapy in overtly tumor-bearing mouse models. It will therefore be of interest to delineate in future studies whether antihistamines can be combined with VEGF pathway inhibitors with or without autophagy-inducing TCAs, and, if so, to consider such combinations for potential clinical evaluation.

### The T cell chemo-attractants CXCL9 and CXCL10 are upregulated in doubly targeted tumors

Although autophagy has been shown to elicit tumor immunity in some contexts (Ladoire et al., 2016a, 2016b; Michaud et al., 2011; Pietrocola et al., 2016), the mechanisms remain obscure. As an entrée, we profiled untreated versus monotherapy or combo-treated tumors, focusing on cytokines and chemokines. Two chemo-attractants for CD8 T cells—CXCL9 and CXCL10—were substantially upregulated in the IM + anti-VEGF but not the monotherapy arms (Figure 6A). Consistent with a previous report (House et al., 2020), we found via immunostaining and fluorescence-activated cell sorting (FACS) analysis of tumors that CXCL9 and CXCL10 were predominantly expressed by TAMs (Figures 6B and 6C). We therefore assessed the expression of CXCL9 in TAMs derived from recruited MDMs or resident microglia. We found that CXCL9 was significantly upregulated in CD49d+ MDMs by IM + anti-VEGF, whereas no significant induction was observed within the CD49d− microglia (Figure 6D). We confirmed and extended these results in the PDG model, whereby FACS-sorted microglia and MDMs were subjected to mRNA profiling. CD49d+ MDMs were the primary source of CXCL9 and CXCL10 (Figure S6A), significantly upregulated in treated compared with untreated tumors (Figures S6B and S6C). To assess functionality, we applied a CD49d-blocking antibody (Akkari et al., 2020) in IM + anti-VEGF-treated tumors from the LVRshp53 model and observed a significant decrease in the expression of both T cell-recruiting chemokines (Figure 6E).

To investigate the role of CXCL9/CXCL10, we incorporated a blocking  $\alpha$ CXCR3 antibody into the above-mentioned therapeutic regimens. Notably, *in vivo* blockade of the CXCR3 receptor significantly reduced the efficacy of IM + anti-VEGF therapy (Figure 6F), and substantially reduced the abundance of tumor-infiltrating CD8 T cells (Figures 6G and 6H). Concordantly,  $\alpha$ CXCR3 impaired CD8 and CD4 T cell proliferation in the *ex vivo* co-culture experiments (Figure 6I). However, CXCR3 blockade did not affect the capability of the few remaining T cells to produce cytotoxic cytokines, distinguishing T cell recruitment from activation (Figures 6J–6L). Indeed, tumors treated with imipramine alone had a significant increase in CD8 T cells (Figure 1H) that required VEGF inhibition for activation (see for e.g., Figures 2B–2D).  $\alpha$ CXCR3 also obviated the induction of HEVs in combo-treated tumors (Figure 6M), consistent with the role

of activated CD8 T cells in their induction (Colbeck et al., 2017; Johansson-Percival et al., 2017).

Taken together, these data indicate that the CXCL9/10-CXCR3 axis is instrumental for the enhanced T cell recruitment into GBM tumors, wherein inhibition of VEGF signaling additionally creates a favorable microenvironment for T cell activation.

### PD-L1 blockade augments CD8 T cell activity and improves the efficacy of IM + anti-VEGF

Despite an impressive response to IM + anti-VEGF therapy, GBM tumors eventually progress and evidently develop resistance (e.g., Figure 1C). Given that the efficacy of the double combination is demonstrably dependent—as shown above—on IFN $\gamma$  signaling, which is known to stimulate expression of the immune-checkpoint ligand PD-L1 in tumors (Garcia-Diaz et al., 2017), we investigated PD-L1 as a potential factor in adaptive resistance and eventual relapse.

We observed a substantial increase in PD-L1 when the tumors relapsed in comparison with the otherwise low but detectable levels in control or short-term-treated (responding) tumors (Figure 7A). PD-L1 proved to be upregulated in the immune cell compartment of relapsing tumors (Figures 7B and 7C), principally in TAMs and in particular microglia (Figures 7D–7G). A previous study similarly reported delayed induction of PD-L1 in the TME (Qian et al., 2018). MHC class II expression was upregulated in microglia of tumors responding to IM + anti-VEGF (Figure 4D), and downregulated in non-responding/relapsing tumors (Figure 7H), concomitant with the upregulation of microglial PD-L1 (Figures 7E–7G). Concordantly, the relapsing tumors had reduced infiltration of CD8 T cells and upregulation of the T cell exhaustion markers LAG3 and EOMES (Figures 7I, 7J, S6D, and S6E), of which LAG3 is also considered a functionally important immune checkpoint in cancer (Aroldi et al., 2022, p. 3).

These results motivated evaluation of therapeutic combinations with an anti-PD-L1 antibody. We first characterized GBM tumors after short-term treatment wherein anti-PD-L1 was incorporated into the therapeutic regimen on the same day as IM + anti-VEGF, when PD-L1 is expressed at low levels (Figure 7A). Concomitant immune-checkpoint blockade significantly increased CD8 T cell abundance (Figure 7K). IFN $\gamma$  and GzB were significantly increased, whereas TNF $\alpha$  was unchanged (Figures 7L–7N). Next, we enrolled animals into longer trials where anti-PD-L1 was incorporated concurrently or subsequently into the IM + anti-VEGF therapeutic regimen. We observed a significant improvement in overall survival in both cases (Figure 7O). However, the most pronounced benefit was observed when PD-L1 blockade was initiated on the same day as IM + anti-VEGF (Figure 7O). These data are congruent with previous studies in different pre-clinical models suggesting that early/initial inclusion of immune-checkpoint inhibitors is more effective than incorporation later in the course of therapeutic treatment (Cloughesy et al., 2019; Liu et al., 2016). Interestingly, the combination of anti-VEGF + anti-PD-L1 (without IM) did not improve the overall survival of GBM-bearing mice (Figure 7O), consistent with the failed clinical trials combining PD-1/PD-L1 checkpoint inhibitors with antiangiogenic agents (NCT02337491, NCT03291314), highlighting the importance of imipramine for the observed efficacy of this novel triple therapy (Figure 7O). We also assessed the therapeutic benefit of

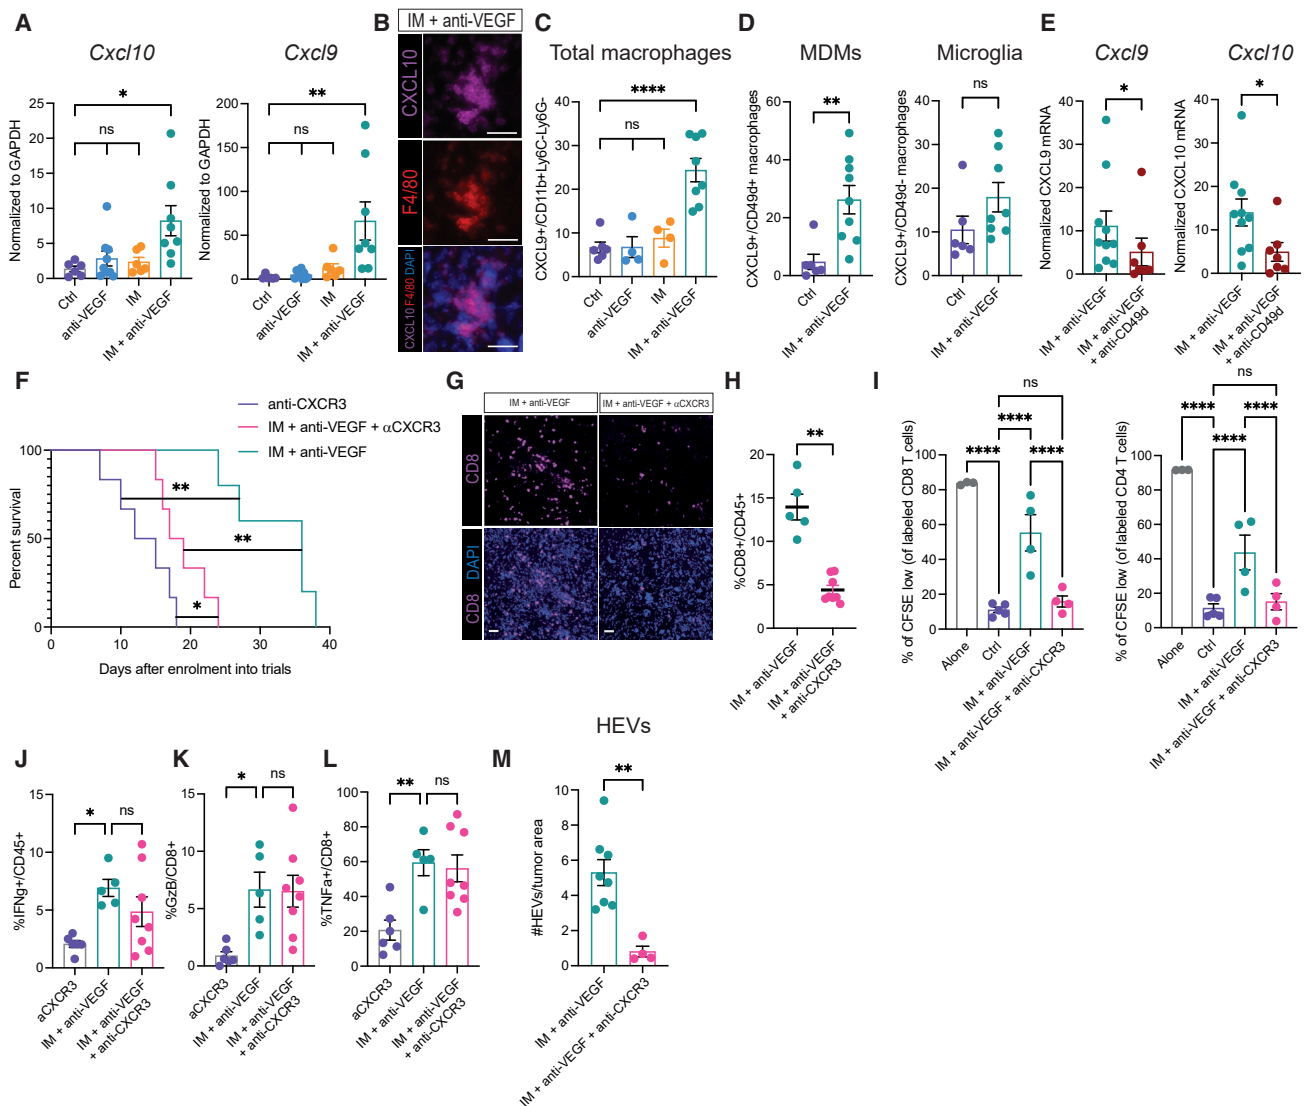

**Figure 6. Macrophage-derived CXCR3 ligands are required for the therapeutic benefit conveyed by the combinatorial regimen of IM + anti-VEGF**

(A) *Cxcl10* and *Cxcl9* expression in bulk tumors. mRNA expression is shown relative to *Gapdh*. Ctrl (n = 6), anti-VEGF (n = 9), IM (n = 6), IM + anti-VEGF (n = 8). (B) Representative image of CXCL10 (magenta), F4/80 (red), and DAPI (blue) staining of LVRshp53 tumors treated with IM + anti-VEGF. Scale bar, 50  $\mu$ m. Images are illustrative of five to six fields in tissue sections from three different tumors. (C) CXCL9 expression in TAMs in untreated (n = 6) or tumors treated with anti-VEGF (n = 4), IM (n = 4), or IM + anti-VEGF (n = 8) revealed by flow cytometry. (D) CXCL9 expression in MDMs and microglia, evaluated as in (C). (E) mRNA *Cxcl9* and *Cxcl10* expression assessed in bulk tumors treated with IM + anti-VEGF (n = 10)  $\pm$   $\alpha$ CD49d (n = 7) to selectively deplete MDMs but not microglia. Expression is normalized to *Gapdh* housekeeping gene. (F) Assessing the contribution of CXCR3 function to the survival of LVRshp53 animals subjected to the indicated treatments. Treatment cohorts:  $\alpha$ CXCR3 (n = 6), IM + anti-VEGF +  $\alpha$ CXCR3 (n = 6), IM + anti-VEGF (n = 5). (G) Representative images of CD8 T cells aimed to assess the effects of  $\alpha$ CXCR3. Representative of whole-slide image analysis of three tumors per treatment. Scale bar, 50  $\mu$ m. (H) Flow cytometry analysis of CD8 T cells in tumors subjected to indicated treatments. (I) *Ex vivo* co-culture of tumor-derived CD11b cells and CFSE-labeled CD8 or CD4 T cells. Myeloid cells were isolated from tumors treated with IM + anti-VEGF (n = 4), IM + anti-VEGF +  $\alpha$ CXCR3 (n = 4), or untreated Ctrl (n = 5). Each dot represents an average of two or three technical replicates. (J) Minimal effect on IFN $\gamma$  secretion by CD8 T cells in tumors treated with  $\alpha$ CXCR3, IM + anti-VEGF, or the triple combination. (K and L) No effect of  $\alpha$ CXCR3 on (K) GzB or (L) TNF $\alpha$  secretion by CD8 T cells co-treated with IM + anti-VEGF. (M) Quantification of immunostaining for HEVs in tumors treated with IM + anti-VEGF (n = 8) or IM + anti-VEGF +  $\alpha$ CXCR3 (n = 4). The data are shown as number of HEVs per square millimeter of tumor tissue. (Para break) Data in all quantitative panels are presented as mean  $\pm$  SEM. \*p < 0.05; \*\*p < 0.01; \*\*\*p < 0.001; \*\*\*\*p < 0.0001; ns, no statistical significance. Statistical analysis by Mann-Whitney test or one-way ANOVA, unless otherwise stated.

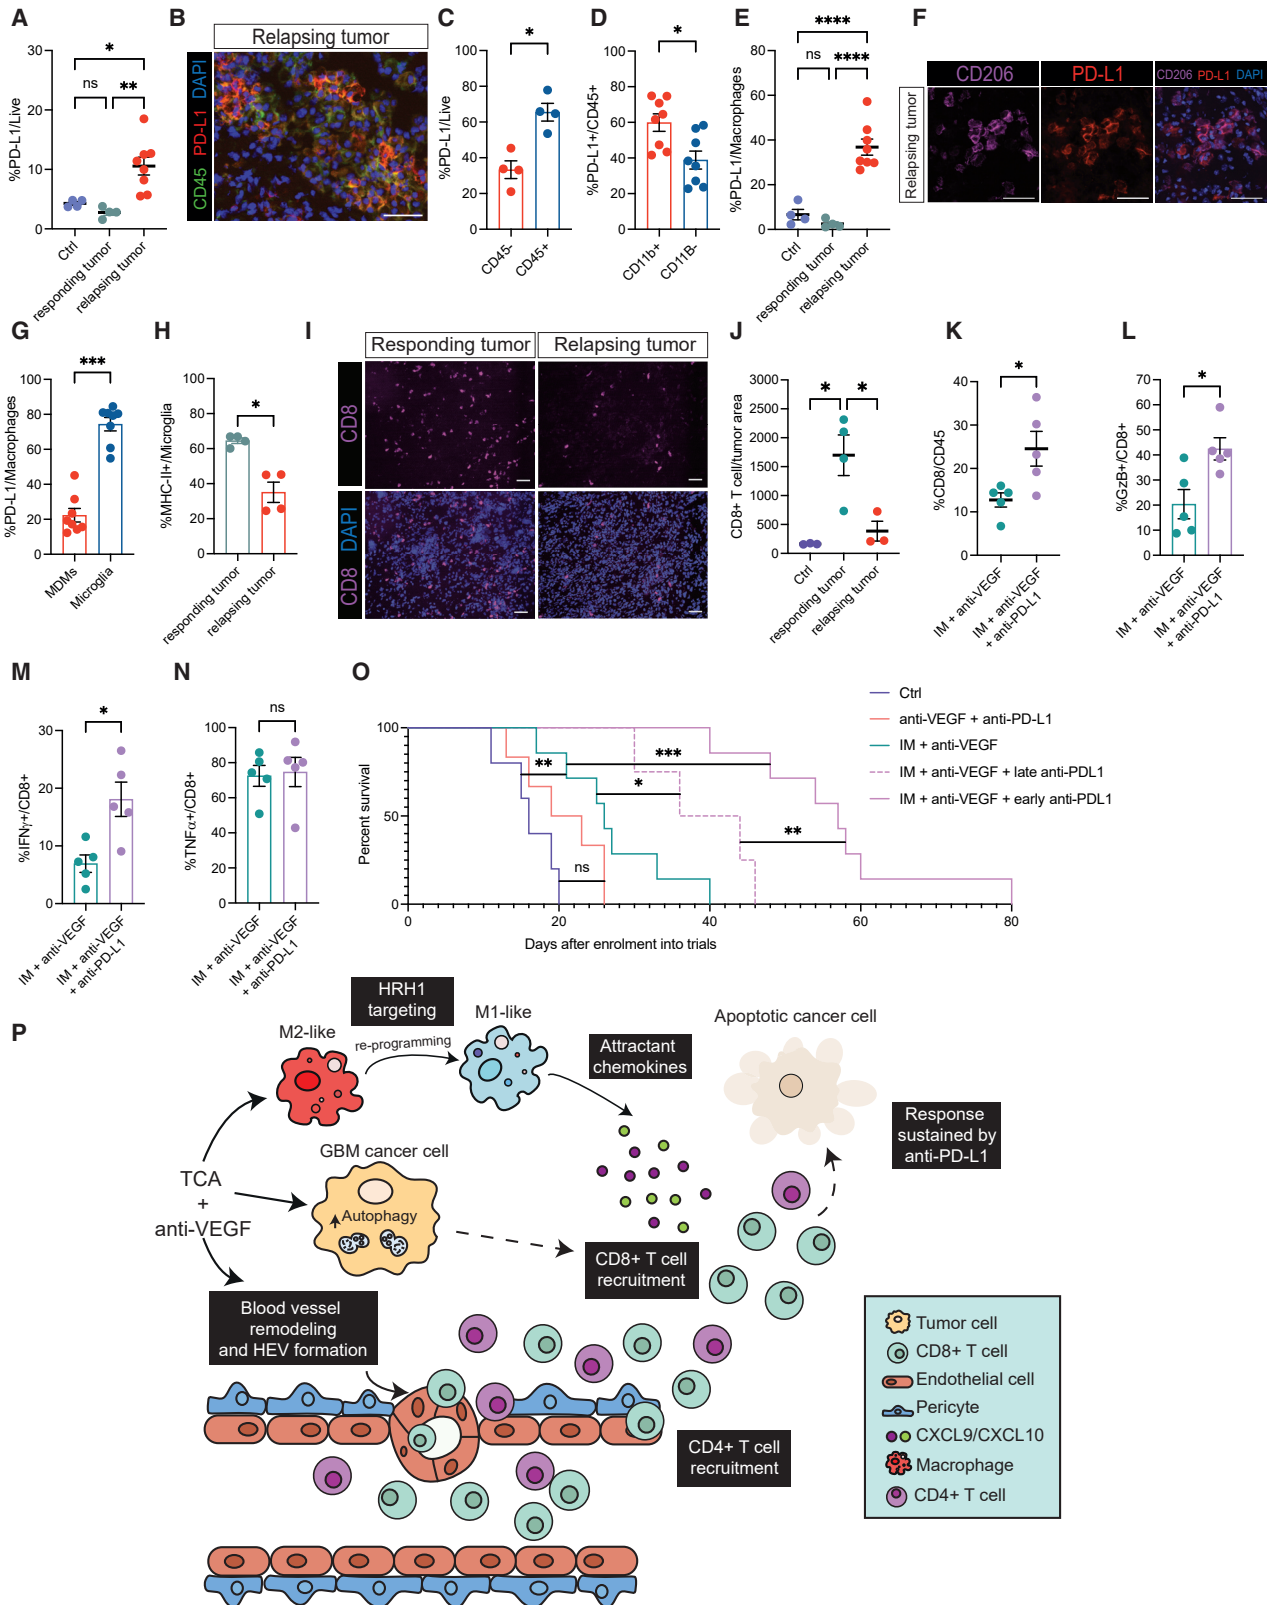

(legend on next page)

combining IM with anti-PD-L1 but without anti-VEGF. Interestingly, this combination had a similar survival advantage to IM + anti-VEGF (Figure S6F), potentially congruent, given the inhibitory effect of IM on HRH1 signaling described above, with a previous report describing better outcomes of human melanoma and lung cancers patients on ICB therapies who were concurrently receiving antihistamines (Li et al., 2022). The underlying mechanisms of response to the IM + anti-PD-L1 therapy warrants further investigation in our GBM models. The substantial survival benefit of the IM + anti-VEGF + anti-PD-L1 triple therapy is nevertheless still limited in duration, implicating other mechanisms of eventual adaptive resistance to this therapeutic regimen, a topic that stands as an important question (and opportunity) for the future (van Elsas et al., 2020).

In conclusion, TCAs, exemplified by imipramine, have been revealed herein to elevate levels of ostensibly immunostimulatory autophagy in cancer cells and to reprogram immunosuppressive macrophages in the TME to express chemokines that attract otherwise rare CD8 T cells, which are expanded and activated by the inclusion of VEGF pathway inhibitors and further sustained by immune-checkpoint blockade, collectively contributing to the significant therapeutic efficacy of this innovative mechanism-guided therapeutic strategy (Figure 7P).

## DISCUSSION

This investigation has revealed a mechanistically intriguing therapeutic co-targeting strategy for GBM brain cancer, in which autophagy is elevated in cancer cells concomitant with reprogramming tumor-promoting macrophages and modifying the angiogenic vasculature. Consistent with clinical experience (Chinot et al., 2014; Duerinck et al., 2018; Gilbert et al., 2014; Hutterer et al., 2014), the anti-VEGF antibody B20S (a mouse analog of the clinically approved antibody drug bevacizumab) as well as tyrosine kinase inhibitors of the VEGF receptors (axitinib and sunitinib) had no therapeutic efficacy, despite the on-target effect

of modestly reducing the density of the tumor vasculature. In contrast, when combined with the TCA imipramine, VEGF/VEGFR inhibitors contributed to significant therapeutic benefit in pre-clinical trials involving multiple *de novo* mouse models of GBM. Unexpectedly, the combination unleashed a potent anti-tumoral immune response involving inflammation by CD8 and CD4 T cells that proved to be the driving force in therapeutic efficacy. The combination of imipramine and a VEGF/VEGFR inhibitor was crucial for the accumulation and activation of CD8 and CD4 T cells, which were otherwise rare and suppressed. Importantly, inclusion of depleting antibodies for both CD8 and CD4 T cell populations completely abrogated therapeutic benefit. As such, the combination of IM + VEGF/VEGFR pathway inhibition is immunostimulatory, a new therapeutic modality for a lethal tumor type heretofore refractory to immune intervention.

Our investigation has revealed new biological activities of TCAs. First, imipramine as monotherapy elicits increased infiltration of CD8 and CD4 T cells into gliomas, recruitment that is dependent on the elevated levels of autophagy, as confirmed by a knockdown of the autophagic regulatory gene ATG3 in cancer cells, consistent with previous reports that autophagy can be immunostimulatory (Ramakrishnan et al., 2012; Rao et al., 2014). As such, further studies to delineate the molecular mechanisms of immunostimulatory autophagy are warranted. Second, imipramine reprogrammed TAMs in the glioma tumor microenvironment, converting immunosuppressive microglia and MDMs into pro-inflammatory macrophages, each of which participates distinctly in the recruitment of T cells, in part by expressing the pro-inflammatory chemokines CXCL9 and CXCL10, as validated by inhibition of their receptor CXCR3. This reprogramming of macrophages demonstrably involves the inhibition by IM of histamine H1 receptor expression in immunosuppressive TAMs; inhibition of Hrh1 is on target, consistent with imipramine's mechanism of action as an antidepressant in the brain. Provocatively, the use of antihistamines is seemingly beneficial for GBM patients, given that chronic ingestion was associated with a better

### Figure 7. PD-L1 is induced in relapsing tumors and its blockade potentiates T cell function to prolong survival benefit in GBM mice

- (A) FACS analysis of PD-L1 in the live cell compartment of tumors treated as indicated. Ctrl (n = 4 tumors), responding to IM + anti-VEGF (n = 4), and relapsing from IM + anti-VEGF (n = 8). Responding tumors were collected after 12 days of treatment. Relapsing tumors were collected when mice became symptomatic or when tumors started to re-grow following a stable phase.
- (B) Representative image of immunostaining to reveal PD-L1 (red), CD45 (green), and DAPI nuclei (blue) in relapsing tumors after IM + anti-VEGF. Scale bar, 50  $\mu$ m. Assessed in four relapsing tumors, n = 8–10 fields imaged per tumor.
- (C) Percentage of PD-L1-positive live cells comparing the CD45<sup>-</sup> and CD45<sup>+</sup> compartments of n = 4 relapsing GBM tumors as revealed by flow cytometry.
- (D) PD-L1 expression in the CD11b<sup>-</sup> and CD11b<sup>+</sup> compartments of CD45<sup>+</sup> cells in n = 8 tumors assessed by flow cytometry.
- (E) Percentage of PD-L1-positive TAMs assessed by FACS. Ctrl (n = 4), responding tumor (n = 4), relapsing tumor (n = 8).
- (F) Representative immunostaining to reveal PD-L1 expression in TAMs. CD206 (magenta), PD-L1 (red), and DAPI in n = 3 relapsing tumors, 8–10 images per tumor. Scale bar, 50  $\mu$ m.
- (G) Expression of PD-L1 in MDMs and microglia of n = 8 relapsing tumors assessed by flow cytometry.
- (H) MHC-II expression in microglia comparing responding (n = 4) and non-responding tumors (n = 4), assessed by flow cytometry.
- (I and J) Representative images (I) and quantification (J) of CD8 T cells in untreated (n = 3), responding (n = 4), and relapsing (n = 3) tumors under IM + anti-VEGF treatment. CD8 (magenta) and DAPI-stained nuclei. Scale bar, 50  $\mu$ m. Each dot indicates the total number of CD8 T cells in an entire tissue section from a tumor.
- (K) Abundance of CD8 T cells from tumors treated short term with IM + anti-VEGF (n = 5) or IM + anti-VEGF +  $\alpha$ PD-L1 (n = 5), assessed by flow cytometry.
- (L–N) GzB (L), IFN $\gamma$  (M), and TNF $\alpha$  (N) expression in CD8 T cells from tumors treated as in (K).
- (O) Assessment of the benefits of early versus late incorporation of anti-PD-L1. Ctrl (n = 5), IM + anti-VEGF (n = 7), IM + anti-VEGF + late anti-PD-L1 (n = 4), IM + anti-VEGF + early anti-PD-L1 (n = 7), anti-VEGF + anti-PD-L1 (n = 6).
- (P) The combination of a TCA (e.g., imipramine) and VEGF/VEGFR inhibitors induces autophagy in cancer cells and remodels the tumor vasculature, conveying survival benefit for mice bearing GBM. Imipramine reprograms M2-like TAMs to more pro-inflammatory phenotype, via inhibition of histamine receptor signaling. Consequent to the dual treatment, CD8 and CD4 T cells are recruited and activated to evoke their cytotoxic effects. The inclusion of anti-PD-L1 in the therapeutic regimen helps sustain the immune response and increases survival benefit. (Para break) Data in all quantitative panels are presented as mean  $\pm$  SEM. \*p < 0.05; \*\*p < 0.01; \*\*\*p < 0.001; \*\*\*\*p < 0.0001; ns, no statistical significance. Statistical analysis by Mann-Whitney test or one-way ANOVA, unless otherwise stated.

outcome. Our study has not addressed the possibility that imipramine (and antihistamines) may also modulate the tumor-promoting activity of neutrophils and their granulocytic myeloid progenitors, which have been implicated in a mouse model of GBM (Magod et al., 2021).

While imipramine was pro-inflammatory as monotherapy, the degree of immune cell infiltration was modest, and the CD8 T cells were largely inactive. In marked contrast, when a VEGF pathway inhibitor was included, the infiltration of CD8 and CD4 T cells was increased, and the CD8 T cells were activated; in addition, cytotoxic CD4 T cells were detected, implicating them both in supporting CD8 T cell function and in directly killing glioma cancer cells. The VEGF pathway inhibitors had several effects salient to their combinatorial benefit. First, the levels of autophagy were increased over that produced by IM alone. Second, the aberrant tumor vasculature was remodeled into more normal-like morphology, with induction of HEVs, features known to facilitate T cell infiltration into tumors (Allen et al., 2017; Lanitis et al., 2015; Schmittnaegel et al., 2017). Notably, VEGF inhibitors are showing benefits in clinical trials in combination with immunomodulatory agents (Hodi et al., 2014) (NCT02210117, NCT02348008, NCT01633970), albeit not in GBM. Consistently, there is no benefit if imipramine is excluded in our GBM models, thus mirroring clinical experiences involving VEGF pathway inhibitors and immune-checkpoint inhibitors, either alone or in combination (NCT02337491, NCT03291314). Finally, the reduction in vascular density (inhibition of angiogenesis and vascular pruning) produced regions of hypoxia, wherein a subset of CD8 cells were preferentially localized, consistent with reports that hypoxia can contribute to T cell activation (de Almeida et al., 2020; Doedens et al., 2013; Xu et al., 2016).

The therapeutic benefit produced by the combination was notable, but nevertheless limited, implicating adaptive resistance. The immune-checkpoint ligand PD-L1 was upregulated in relapsing tumors, consistent with a role in CD8 T cell exhaustion and therapeutic resistance (Jiang et al., 2015). We therefore incorporated a PD-L1 blocking antibody into the therapeutic regimen, which markedly enhanced survival. Despite almost doubling the survival benefit, the triple therapy eventually failed, implicating yet other resistance mechanisms worthy of future investigation. Other future investigations that might incentivize clinical trials include the development of standard of care (SoC) models using TMZ and RT that are tractable for testing the double and triple combos in a quasi-second-line setting (without surgery), as well as first line by including them up front with SoC agents.

Finally, although we suspect that the hyperactivation of autophagy may be relatively specific to GBM, there is interesting promise that the combination of IM + anti-VEGF ( $\pm$  immune-checkpoint blockade) could have broader applicability, as illustrated by our finding that imipramine also promotes CD8 T cell influx in a mouse model of BRAF-induced melanoma. These results motivate future studies to assess the therapeutic utility of imipramine in melanoma and other tumor types as an enhancer of tumor immunity in combination with VEGF/VEGFR inhibitors and various immunotherapeutic modalities.

In conclusion, the combination of three classes of clinically approved drugs resulted in remarkable therapeutic benefit in a mouse model of GBM, by virtue of concordantly modifying multi-

ple features of the otherwise immunosuppressive glioma tumor microenvironment, thereby rendering it susceptible to efficacious immune attack (Figure 7P). Given the dismal prognosis for GBM patients, these conceptual findings motivate consideration of clinical trials aimed to evaluate TCAs such as imipramine combined with VEGF/VEGFR pathway inhibitors and immune-checkpoint blockade. Toward that end, our results have motivated a proof-of-concept clinical trial in second-line GBM patients (<https://themarkfoundation.org/portfolio/a-proof-of-concept-clinical-trial-of-an-innovative-new-therapy-for-glioblastoma/>), which will begin to assess the translational potential of this intriguing new therapeutic strategy.

## STAR★METHODS

Detailed methods are provided in the online version of this paper and include the following:

- KEY RESOURCES TABLE
- RESOURCE AVAILABILITY
  - Lead contact
  - Materials availability
  - Data and code availability
- METHOD DETAILS
  - Study design
  - Mouse models
  - Statistics
  - Production and titration of lentiviral particles
  - Cell culture
  - Bioluminescent monitoring
  - MRI imaging
  - Therapeutic trials
  - Harvesting of mouse tissues
  - RNA isolation, reverse transcription, and quantitative RT-PCR
  - Western blotting
  - BMDM isolation and polarization
  - Cell isolation and coculture experiments
  - *Ex vivo* phagocytosis assay
  - cAMP ELISA
  - Histology
  - Quantification of tissue staining
  - Flow cytometry
  - Survival analysis in the TCGA glioblastoma dataset
  - Glioblastoma patient survival and antihistamine treatment

## SUPPLEMENTAL INFORMATION

Supplemental information can be found online at <https://doi.org/10.1016/j.ccell.2022.08.014>.

## ACKNOWLEDGMENTS

We thank E. Drori, M.W. Peng, M. Pluess, M.A. Gaveta, and S. Lamy from the Hanahan lab for expert technical assistance, I. Michael for the B20S antibody, I. Verma for the pTomo HRasV12-Luc-shp53 lentivector, R. Guet for developing a QuPath analysis pipeline, M. De Palma for comments on the manuscript, and Irv Weissman for discussions. This study benefitted from the CPG, PTPSP, HCF, BIOP, and FCCF technology core facilities of the School of Life Sciences at EPFL and the AIVC, IVIF, CIF, and FCF facilities in Agora

Translational Cancer Research Center. The research was initially supported both by an ERC Advanced Grant (322491) and by core support from EPFL, and subsequently by core support from the Ludwig Institute for Cancer Research (D.H. and J.A.J.), and instrumentally by grants from the Ivy Brain Tumor Center at the Barrow Neurological Institute (Phoenix, AZ, USA) and Fondation Sante (Belmont-sur-Lausanne, Switzerland). This study was further supported by the Swiss Cancer Research Foundation (KFS-5280-02-2021 to J.A.J.) and a Veni fellowship from the Netherlands Organization for Scientific Research (A.Z.).

#### AUTHOR CONTRIBUTIONS

J.S. established the lentivirus model and piloted early experimental designs. A.C. designed and conducted comprehensive experiments constituting a majority of the data shown, finalized the figures, and edited the manuscript. K.S. performed the pilot study involving the VEGFR TKIs. M.T. performed experiments in the melanoma model. A.Z. helped set up therapeutic trials in the preneural PDG model and advised A.C. on parameters and serial imaging. J.A.J. advised A.C. and A.Z. in analysis of the preneural PDG model, provided cohorts of tumor-bearing PDG mice, and edited the manuscript. K.H. analyzed human GBM patient datasets for associations with histamine receptor expression and antihistamine usage. D.H. supervised the project, evaluated data, contributed to experimental designs, and drafted and edited the manuscript. All data are available in the manuscript or the supplementary materials.

#### DECLARATION OF INTERESTS

D.H. is also a Director of Opna Bio, a Lausanne-based biotech startup that has no relationship to or vested interest in this manuscript.

Received: November 3, 2021

Revised: June 29, 2022

Accepted: August 15, 2022

Published: September 15, 2022

#### REFERENCES

Akkari, L., Bowman, R.L., Tessier, J., Klemm, F., Handgraaf, S.M., de Groot, M., Quail, D.F., Tillard, L., Gadiot, J., Huse, J.T., et al. (2020). Dynamic changes in glioma macrophage populations after radiotherapy reveal CSF-1R inhibition as a strategy to overcome resistance. *Sci. Transl. Med.* *12*, eaaw7843. <https://doi.org/10.1126/scitranslmed.aaw7843>.

Allen, E., Jabouille, A., Rivera, L.B., Lodewijckx, I., Missiaen, R., Steri, V., Feyen, K., Tawney, J., Hanahan, D., Michael, I.P., and Bergers, G. (2017). Combined antiangiogenic and anti-PD-L1 therapy stimulates tumor immunity through HEV formation. *Sci. Transl. Med.* *9*, eaak9679. <https://doi.org/10.1126/scitranslmed.aak9679>.

Alspach, E., Lussier, D.M., Miceli, A.P., Kizhvatov, I., DuPage, M., Luoma, A.M., Meng, W., Licht, C.F., Esaulova, E., Vomund, A.N., et al. (2019). MHC-II neoantigens shape tumour immunity and response to immunotherapy. *Nature* *574*, 696–701. <https://doi.org/10.1038/s41586-019-1671-8>.

Aroldi, F., Saleh, R., Jafferji, I., Barreto, C., Saberian, C., and Middleton, M.R. (2022). Lag3: from bench to bedside. *Cancer Treat Res.* *183*, 185–199. [https://doi.org/10.1007/978-3-030-96376-7\\_6](https://doi.org/10.1007/978-3-030-96376-7_6).

Bankhead, P., Loughrey, M.B., Fernández, J.A., Dombrowski, Y., McArt, D.G., Dunne, P.D., McQuaid, S., Gray, R.T., Murray, L.J., Coleman, H.G., et al. (2017). QuPath: open source software for digital pathology image analysis. *Sci. Rep.* *7*, 16878. <https://doi.org/10.1038/s41598-017-17204-5>.

Boilly, B., Faulkner, S., Jobling, P., and Hondermarck, H. (2017). Nerve dependence: from regeneration to cancer. *Cancer Cell* *31*, 342–354. <https://doi.org/10.1016/j.ccell.2017.02.005>.

Bolte, S., and Cordelières, F.P. (2006). A guided tour into subcellular colocalization analysis in light microscopy. *J. Microsc.* *224*, 213–232. <https://doi.org/10.1111/j.1365-2818.2006.01706.x>.

Bowman, R.L., Klemm, F., Akkari, L., Pyonteck, S.M., Sevenich, L., Quail, D.F., Dhara, S., Simpson, K., Gardner, E.E., Iacobuzio-Donahue, C.A., et al. (2016). Macrophage ontogeny underlies differences in tumor-specific education in

brain malignancies. *Cell Rep.* *17*, 2445–2459. <https://doi.org/10.1016/j.celrep.2016.10.052>.

Cachot, A., Bilous, M., Liu, Y.-C., Li, X., Saillard, M., Cenerenti, M., Rockinger, G.A., Wyss, T., Guillaume, P., Schmidt, J., et al. (2021). Tumor-specific cytolytic CD4 T cells mediate immunity against human cancer. *Sci. Adv.* *7*, eabe3348. <https://doi.org/10.1126/sciadv.abe3348>.

Chavez-Dominguez, R., Perez-Medina, M., Lopez-Gonzalez, J.S., Galicia-Velasco, M., and Aguilar-Cazares, D. (2020). The double-edge sword of autophagy in cancer: from tumor suppression to pro-tumor activity. *Front. Oncol.* *10*, 578418. <https://doi.org/10.3389/fonc.2020.578418>.

Chinot, O.L., Wick, W., Mason, W., Henriksson, R., Saran, F., Nishikawa, R., Carpentier, A.F., Hoang-Xuan, K., Kavan, P., Cernea, D., et al. (2014). Bevacizumab plus radiotherapy–temozolomide for newly diagnosed glioblastoma. *N. Engl. J. Med.* *370*, 709–722. <https://doi.org/10.1056/NEJMoa1308345>.

Cloughesy, T.F., Mochizuki, A.Y., Orpilla, J.R., Hugo, W., Lee, A.H., Davidson, T.B., Wang, A.C., Ellingson, B.M., Rytlewski, J.A., Sanders, C.M., et al. (2019). Neoadjuvant anti-PD-1 immunotherapy promotes a survival benefit with intratumoral and systemic immune responses in recurrent glioblastoma. *Nat. Med.* *25*, 477–486. <https://doi.org/10.1038/s41591-018-0337-7>.

Colbeck, E.J., Jones, E., Hindley, J.P., Smart, K., Schulz, R., Browne, M., Cutting, S., Williams, A., Parry, L., Godkin, A., et al. (2017). Treg depletion licenses T cell-driven HEV neogenesis and promotes tumor destruction. *Cancer Immunol. Res.* *5*, 1005–1015. <https://doi.org/10.1158/2326-6066.CIR-17-0131>.

Das, A.K., Yoshimura, S., Mishima, R., Fujimoto, K., Mizuguchi, H., Dev, S., Wakayama, Y., Kitamura, Y., Horio, S., Takeda, N., and Fukui, H. (2007). Stimulation of histamine H1 receptor up-regulates histamine H1 receptor itself through activation of receptor gene transcription. *J. Pharmacol. Sci.* *103*, 374–382. <https://doi.org/10.1254/jphs.FP0061411>.

de Almeida, P.E., Mak, J., Hernandez, G., Jesudason, R., Herault, A., Javinal, V., Borneo, J., Kim, J.M., and Walsh, K.B. (2020). Anti-VEGF treatment enhances CD8<sup>+</sup> T-cell antitumor activity by amplifying hypoxia. *Cancer Immunol. Res.* *8*, 806–818. <https://doi.org/10.1158/2326-6066.CIR-19-0360>.

Doedens, A.L., Phan, A.T., Stradner, M.H., Fujimoto, J.K., Nguyen, J.V., Yang, E., Johnson, R.S., and Goldrath, A.W. (2013). Hypoxia-inducible factors enhance the effector responses of CD8<sup>+</sup> T cells to persistent antigen. *Nat. Immunol.* *14*, 1173–1182. <https://doi.org/10.1038/ni.2714>.

Duerinck, J., Du Four, S., Bouttens, F., Andre, C., Verschaeve, V., Van Fraeyenhove, F., Chaskis, C., D’Haene, N., Le Mercier, M., Rogiers, A., et al. (2018). Randomized phase II trial comparing axitinib with the combination of axitinib and lomustine in patients with recurrent glioblastoma. *J. Neuro Oncol.* *136*, 115–125. <https://doi.org/10.1007/s11060-017-2629-z>.

Franco, M., Man, S., Chen, L., Emmenegger, U., Shaked, Y., Cheung, A.M., Brown, A.S., Hicklin, D.J., Foster, F.S., and Kerbel, R.S. (2006). Targeted anti-vascular endothelial growth factor receptor-2 therapy leads to short-term and long-term impairment of vascular function and increase in tumor hypoxia. *Cancer Res.* *66*, 3639–3648. <https://doi.org/10.1158/0008-5472.CAN-05-3295>.

Friedmann-Morvinski, D., Bushong, E.A., Ke, E., Soda, Y., Marumoto, T., Singer, O., Ellisman, M.H., and Verma, I.M. (2012). Dedifferentiation of neurons and astrocytes by oncogenes can induce gliomas in mice. *Science* *338*, 1080–1084. <https://doi.org/10.1126/science.1226929>.

Garcia-Diaz, A., Shin, D.S., Moreno, B.H., Saco, J., Escuin-Ordinas, H., Rodriguez, G.A., Zaretsky, J.M., Sun, L., Hugo, W., Wang, X., et al. (2017). Interferon receptor signaling pathways regulating PD-L1 and PD-L2 expression. *Cell Rep.* *19*, 1189–1201. <https://doi.org/10.1016/j.celrep.2017.04.031>.

Gilbert, M.R., Dignam, J.J., Armstrong, T.S., Wefel, J.S., Blumenthal, D.T., Vogelbaum, M.A., Colman, H., Chakravarti, A., Pugh, S., Won, M., et al. (2014). A randomized trial of bevacizumab for newly diagnosed glioblastoma. *N. Engl. J. Med.* *370*, 699–708. <https://doi.org/10.1056/NEJMoa1308573>.

Goldman, M.J., Craft, B., Hastie, M., Repecka, K., McDade, F., Kamath, A., Banerjee, A., Luo, Y., Rogers, D., Brooks, A.N., et al. (2020). Visualizing and interpreting cancer genomics data via the Xena platform. *Nat. Biotechnol.* *38*, 675–678. <https://doi.org/10.1038/s41587-020-0546-8>.



- Hambardzumyan, D., Amankulor, N.M., Helmy, K.Y., Becher, O.J., and Holland, E.C. (2009). Modeling adult gliomas using RCAS/t-va technology. *Transl. Oncol.* 2, 89–95. <https://doi.org/10.1593/tlo.09100>.
- Hambardzumyan, D., Gutmann, D.H., and Kettenmann, H. (2016). The role of microglia and macrophages in glioma maintenance and progression. *Nat. Neurosci.* 19, 20–27. <https://doi.org/10.1038/nn.4185>.
- Hanoun, M., Maryanovich, M., Arnal-Estapé, A., and Frenette, P.S. (2015). Neural regulation of hematopoiesis, inflammation, and cancer. *Neuron* 86, 360–373. <https://doi.org/10.1016/j.neuron.2015.01.026>.
- Hodi, F.S., Lawrence, D., Lezcano, C., Wu, X., Zhou, J., Sasada, T., Zeng, W., Giobbie-Hurder, A., Atkins, M.B., Ibrahim, N., et al. (2014). Bevacizumab plus ipilimumab in patients with metastatic melanoma. *Cancer Immunol. Res.* 2, 632–642. <https://doi.org/10.1158/2326-6066.CCR-14-0053>.
- House, I.G., Savas, P., Lai, J., Chen, A.X.Y., Oliver, A.J., Teo, Z.L., Todd, K.L., Henderson, M.A., Giuffrida, L., Petley, E.V., et al. (2020). Macrophage-derived CXCL9 and CXCL10 are required for antitumor immune responses following immune checkpoint blockade. *Clin. Cancer Res.* 26, 487–504. <https://doi.org/10.1158/1078-0432.CCR-19-1868>.
- Hussain, S.F., Yang, D., Suki, D., Aldape, K., Grimm, E., and Heimberger, A.B. (2006). The role of human glioma-infiltrating microglia/macrophages in mediating antitumor immune responses. *Neuro Oncol.* 8, 261–279. <https://doi.org/10.1215/15228517-2006-008>.
- Hutterer, M., Nowosielski, M., Haybaeck, J., Embacher, S., Stockhammer, F., Gotwald, T., Holzner, B., Capper, D., Preusser, M., Marosi, C., et al. (2014). A single-arm phase II Austrian/German multicenter trial on continuous daily sunitinib in primary glioblastoma at first recurrence (SURGE 01-07). *Neuro Oncol.* 16, 92–102. <https://doi.org/10.1093/neuonc/not161>.
- Jiang, Y., Li, Y., and Zhu, B. (2015). T-cell exhaustion in the tumor microenvironment. *Cell Death Dis.* 6, e1792. <https://doi.org/10.1038/cddis.2015.162>.
- Johansson-Percival, A., He, B., Li, Z.-J., Kjellén, A., Russell, K., Li, J., Larma, I., and Ganss, R. (2017). De novo induction of intratumoral lymphoid structures and vessel normalization enhances immunotherapy in resistant tumors. *Nat. Immunol.* 18, 1207–1217. <https://doi.org/10.1038/ni.3836>.
- Klemm, F., Maas, R.R., Bowman, R.L., Kornete, M., Soukup, K., Nassiri, S., Brouland, J.-P., Iacobuzio-Donahue, C.A., Brennan, C., Tabar, V., et al. (2020). Interrogation of the microenvironmental landscape in brain tumors reveals disease-specific alterations of immune cells. *Cell* 181, 1643–1660.e17. <https://doi.org/10.1016/j.cell.2020.05.007>.
- Ladoire, S., Enot, D., Senovilla, L., Chaix, M., Zitvogel, L., and Kroemer, G. (2016a). Positive impact of autophagy in human breast cancer cells on local immunosurveillance. *Oncoimmunology* 5, e1174801. <https://doi.org/10.1080/2162402X.2016.1174801>.
- Ladoire, S., Enot, D., Senovilla, L., Ghiringhelli, F., Poirier-Colame, V., Chaba, K., Semeraro, M., Chaix, M., Penault-Llorca, F., Arnould, L., et al. (2016b). The presence of LC3B puncta and HMGB1 expression in malignant cells correlate with the immune infiltrate in breast cancer. *Autophagy* 12, 864–875. <https://doi.org/10.1080/15548627.2016.1154244>.
- Lanitis, E., Irving, M., and Coukos, G. (2015). Targeting the tumor vasculature to enhance T cell activity. *Curr. Opin. Immunol.* 33, 55–63. <https://doi.org/10.1016/j.coi.2015.01.011>.
- Li, H., Xiao, Y., Li, Q., Yao, J., Yuan, X., Zhang, Y., Yin, X., Saito, Y., Fan, H., Li, P., et al. (2022). The allergy mediator histamine confers resistance to immunotherapy in cancer patients via activation of the macrophage histamine receptor H1. *Cancer Cell* 40, 36–52.e9. <https://doi.org/10.1016/j.ccell.2021.11.002>.
- Li, Y., Ali, S., Clarke, J., and Cha, S. (2017). Bevacizumab in recurrent glioma: patterns of treatment failure and implications. *Brain Tumor Res. Treat.* 5, 1–9. <https://doi.org/10.14791/btrt.2017.5.1.1>.
- Liang, W.-C., Wu, X., Peale, F.V., Lee, C.V., Meng, Y.G., Gutierrez, J., Fu, L., Malik, A.K., Gerber, H.-P., Ferrara, N., and Fuh, G. (2006). Cross-species vascular endothelial growth factor (VEGF)-blocking antibodies completely inhibit the growth of human tumor xenografts and measure the contribution of stromal VEGF. *J. Biol. Chem.* 281, 951–961. <https://doi.org/10.1074/jbc.M508199200>.
- Liu, J., Blake, S.J., Yong, M.C.R., Harjunpää, H., Ngiow, S.F., Takeda, K., Young, A., O'Donnell, J.S., Allen, S., Smyth, M.J., and Teng, M.W.L. (2016). Improved efficacy of neoadjuvant compared to adjuvant immunotherapy to eradicate metastatic disease. *Cancer Discov.* 6, 1382–1399. <https://doi.org/10.1158/2159-8290.CD-16-0577>.
- Magod, P., Mastandrea, I., Rouso-Noori, L., Agemy, L., Shapira, G., Shomron, N., and Friedmann-Morvinski, D. (2021). Exploring the longitudinal glioma microenvironment landscape uncovers reprogrammed pro-tumorigenic neutrophils in the bone marrow. *Cell Rep.* 36, 109480. <https://doi.org/10.1016/j.celrep.2021.109480>.
- Marumoto, T., Tashiro, A., Friedmann-Morvinski, D., Scadeng, M., Soda, Y., Gage, F.H., and Verma, I.M. (2009). Development of a novel mouse glioma model using lentiviral vectors. *Nat. Med.* 15, 110–116. <https://doi.org/10.1038/nm.1863>.
- Michaud, M., Martins, I., Sukkurwala, A.Q., Adjemian, S., Ma, Y., Pellegatti, P., Shen, S., Kepp, O., Scoazec, M., Mignot, G., et al. (2011). Autophagy-dependent anticancer immune responses induced by chemotherapeutic agents in mice. *Science* 334, 1573–1577. <https://doi.org/10.1126/science.1208347>.
- Motzer, R.J., Escudier, B., Tomczak, P., Hutson, T.E., Michaelson, M.D., Negrier, S., Oudard, S., Gore, M.E., Tarazi, J., Hariharan, S., et al. (2013). Axitinib versus sorafenib as second-line treatment for advanced renal cell carcinoma: overall survival analysis and updated results from a randomised phase 3 trial. *Lancet Oncol.* 14, 552–562. [https://doi.org/10.1016/S1470-2045\(13\)70093-7](https://doi.org/10.1016/S1470-2045(13)70093-7).
- Neftel, C., Laffy, J., Filbin, M.G., Hara, T., Shore, M.E., Rahme, G.J., Richman, A.R., Silverbush, D., Shaw, M.L., Hebert, C.M., et al. (2019). An integrative model of cellular states, plasticity, and genetics for glioblastoma. *Cell* 178, 835–849.e21. <https://doi.org/10.1016/j.cell.2019.06.024>.
- Neubert, N.J., Schmittnaegel, M., Bordry, N., Nassiri, S., Wald, N., Martignier, C., Tillé, L., Homicsko, K., Damsky, W., Maby-El Hajjami, H., et al. (2018). T cell-induced CSF1 promotes melanoma resistance to PD1 blockade. *Sci. Transl. Med.* 10, eaan3311. <https://doi.org/10.1126/scitranslmed.aan3311>.
- Oh, D.Y., Kwek, S.S., Raju, S.S., Li, T., McCarthy, E., Chow, E., Aran, D., Ilano, A., Pai, C.-C.S., Rancan, C., et al. (2020). Intratumoral CD4+ T cells mediate anti-tumor cytotoxicity in human bladder cancer. *Cell* 181, 1612–1625.e13. <https://doi.org/10.1016/j.cell.2020.05.017>.
- Ostrom, Q.T., Gittleman, H., Truitt, G., Boscia, A., Kruchko, C., and Barnholtz-Sloan, J.S. (2018). CBTRUS statistical report: primary brain and other central nervous system tumors diagnosed in the United States in 2011–2015. *Neuro Oncol.* 20, iv1–iv86. <https://doi.org/10.1093/neuonc/nyy131>.
- Pearson, J.R.D., and Regad, T. (2017). Targeting cellular pathways in glioblastoma multiforme. *Signal Transduct. Target. Ther.* 2, 17040. <https://doi.org/10.1038/sigtrans.2017.40>.
- Phillips, H.S., Kharbanda, S., Chen, R., Forrester, W.F., Soriano, R.H., Wu, T.D., Misra, A., Nigro, J.M., Colman, H., Soroceanu, L., et al. (2006). Molecular subclasses of high-grade glioma predict prognosis, delineate a pattern of disease progression, and resemble stages in neurogenesis. *Cancer Cell* 9, 157–173. <https://doi.org/10.1016/j.ccr.2006.02.019>.
- Philpott, C., Tovell, H., Frayling, I.M., Cooper, D.N., and Upadhyaya, M. (2017). The NF1 somatic mutational landscape in sporadic human cancers. *Hum. Genomics* 11, 13. <https://doi.org/10.1186/s40246-017-0109-3>.
- Pietrocola, F., Pol, J., Vacchelli, E., Rao, S., Enot, D.P., Baracco, E.E., Levesque, S., Castoldi, F., Jacquolot, N., Yamazaki, T., et al. (2016). Caloric restriction mimetics enhance anticancer immunosurveillance. *Cancer Cell* 30, 147–160. <https://doi.org/10.1016/j.ccell.2016.05.016>.
- Prior, I.A., Hood, F.E., and Hartley, J.L. (2020). The frequency of ras mutations in cancer. *Cancer Res.* 80, 2969–2974. <https://doi.org/10.1158/0008-5472.CAN-19-3682>.
- Pyonteck, S.M., Akkari, L., Schuhmacher, A.J., Bowman, R.L., Sevenich, L., Quail, D.F., Olson, O.C., Quick, M.L., Huse, J.T., Teijeiro, V., et al. (2013). CSF-1R inhibition alters macrophage polarization and blocks glioma progression. *Nat. Med.* 19, 1264–1272. <https://doi.org/10.1038/nm.3337>.
- Qian, J., Wang, C., Wang, B., Yang, J., Wang, Y., Luo, F., Xu, J., Zhao, C., Liu, R., and Chu, Y. (2018). The IFN- $\gamma$ /PD-L1 axis between T cells and tumor

- microenvironment: hints for glioma anti-PD-1/PD-L1 therapy. *J. Neuroinflammation* 15, 290. <https://doi.org/10.1186/s12974-018-1330-2>.
- Quail, D.F., and Joyce, J.A. (2017). The microenvironmental landscape of brain tumors. *Cancer Cell* 31, 326–341. <https://doi.org/10.1016/j.ccell.2017.02.009>.
- Quezada, S.A., Simpson, T.R., Peggs, K.S., Merghoub, T., Vider, J., Fan, X., Blasberg, R., Yagita, H., Muranski, P., Antony, P.A., et al. (2010). Tumor-reactive CD4+ T cells develop cytotoxic activity and eradicate large established melanoma after transfer into lymphopenic hosts. *J. Exp. Med.* 207, 637–650. <https://doi.org/10.1084/jem.20091918>.
- Ramakrishnan, R., Huang, C., Cho, H.-I., Lloyd, M., Johnson, J., Ren, X., Altiock, S., Sullivan, D., Weber, J., Celis, E., and Gabrilovich, D.I. (2012). Autophagy induced by conventional chemotherapy mediates tumor cell sensitivity to immunotherapy. *Cancer Res.* 72, 5483–5493. <https://doi.org/10.1158/0008-5472.CAN-12-2236>.
- Rao, S., Yang, H., Penninger, J.M., and Kroemer, G. (2014). Autophagy in non-small cell lung carcinogenesis: a positive regulator of antitumor immunosurveillance. *Autophagy* 10, 529–531. <https://doi.org/10.4161/auto.27643>.
- Reardon, D.A., Omuro, A., Brandes, A.A., Rieger, J., Wick, A., Sepulveda, J., Phuphanich, S., de Souza, P., Ahluwalia, M.S., Lim, M., et al. (2017). OS10.3 randomized phase 3 study evaluating the efficacy and safety of nivolumab vs bevacizumab in patients with recurrent glioblastoma: CheckMate 143. *Neuro Oncol.* 19, iii21. <https://doi.org/10.1093/neuonc/nox036.071>.
- Sade-Feldman, M., Yizhak, K., Bjorgaard, S.L., Ray, J.P., de Boer, C.G., Jenkins, R.W., Lieb, D.J., Chen, J.H., Frederick, D.T., Barzily-Rokni, M., et al. (2018). Defining T cell states associated with response to checkpoint immunotherapy in melanoma. *Cell* 175, 998–1013.e20. <https://doi.org/10.1016/j.cell.2018.10.038>.
- Salmon, P., and Trono, D. (2006). Production and titration of lentiviral vectors. *Curr. Protoc. Neurosci.* 37, 4–21. <https://doi.org/10.1002/0471142301.ns0421s37>.
- Sautès-Fridman, C., Petitprez, F., Calderaro, J., and Fridman, W.H. (2019). Tertiary lymphoid structures in the era of cancer immunotherapy. *Nat. Rev. Cancer* 19, 307–325. <https://doi.org/10.1038/s41568-019-0144-6>.
- Schalper, K.A., Rodriguez-Ruiz, M.E., Diez-Valle, R., López-Janeiro, A., Porciuncula, A., Idoate, M.A., Inogés, S., de Andrea, C., López-Díaz de Cerio, A., Tejada, S., et al. (2019). Neoadjuvant nivolumab modifies the tumor immune microenvironment in resectable glioblastoma. *Nat. Med.* 25, 470–476. <https://doi.org/10.1038/s41591-018-0339-5>.
- Schmittnaegel, M., Rigamonti, N., Kadioglu, E., Cassará, A., Wyser Rmilic, C., Kiialainen, A., Kienast, Y., Mueller, H.-J., Ooi, C.-H., Laoui, D., and De Palma, M. (2017). Dual angiopoietin-2 and VEGFA inhibition elicits antitumor immunity that is enhanced by PD-1 checkpoint blockade. *Sci. Transl. Med.* 9, eaak9670. <https://doi.org/10.1126/scitranslmed.aak9670>.
- Shchorr, K., Massaras, A., and Hanahan, D. (2015). Dual targeting of the autophagic regulatory circuitry in gliomas with repurposed drugs elicits cell-lethal autophagy and therapeutic benefit. *Cancer Cell* 28, 456–471. <https://doi.org/10.1016/j.ccell.2015.08.012>.
- Shi, Y., Oeh, J., Hitz, A., Hedehus, M., Eastham-Anderson, J., Peale, F.V., Hamilton, P., O'Brien, T., Sampath, D., and Carano, R.A.D. (2017). Monitoring and targeting anti-VEGF induced hypoxia within the viable tumor by 19 F-MRI and multispectral analysis. *Neoplasia* 19, 950–959. <https://doi.org/10.1016/j.neo.2017.07.010>.
- Siddiqui, I., Schaeuble, K., Chennupati, V., Fuertes Marraco, S.A., Calderon-Copete, S., Pais Ferreira, D., Carmona, S.J., Scarpellino, L., Gfeller, D., Pradervand, S., et al. (2019). Intratumoral Tcf1+PD-1+CD8+ T cells with stem-like properties promote tumor control in response to vaccination and checkpoint blockade immunotherapy. *Immunity* 50, 195–211.e10. <https://doi.org/10.1016/j.immuni.2018.12.021>.
- Song, S., Ewald, A.J., Stallcup, W., Werb, Z., and Bergers, G. (2005). PDGFRβ+ perivascular progenitor cells in tumours regulate pericyte differentiation and vascular survival. *Nat. Cell Biol.* 7, 870–879. <https://doi.org/10.1038/ncb1288>.
- Spitzer, M.H., Carmi, Y., Reticker-Flynn, N.E., Kwek, S.S., Madhireddy, D., Martins, M.M., Gherardini, P.F., Prestwood, T.R., Chabon, J., Bendall, S.C., et al. (2017). Systemic immunity is required for effective cancer immunotherapy. *Cell* 168, 487–502.e15. <https://doi.org/10.1016/j.cell.2016.12.022>.
- Stupp, R., Hegi, M.E., Mason, W.P., van den Bent, M.J., Taphoorn, M.J.B., Janzer, R.C., Ludwin, S.K., Allgeier, A., Fisher, B., Belanger, K., et al.; European Organisation for Research and Treatment of Cancer Brain Tumour and Radiation Oncology Groups; National Cancer Institute of Canada Clinical Trials Group (2009). Effects of radiotherapy with concomitant and adjuvant temozolomide versus radiotherapy alone on survival in glioblastoma in a randomised phase III study: 5-year analysis of the EORTC-NCIC trial. *Lancet Oncol.* 10, 459–466. [https://doi.org/10.1016/S1470-2045\(09\)70025-7](https://doi.org/10.1016/S1470-2045(09)70025-7).
- Stupp, R., Mason, W.P., van den Bent, M.J., Weller, M., Fisher, B., Taphoorn, M.J.B., Belanger, K., Brandes, A.A., Marosi, C., Bogdahn, U., et al.; European Organisation for Research and Treatment of Cancer Brain Tumor and Radiotherapy Groups; National Cancer Institute of Canada Clinical Trials Group (2005). Radiotherapy plus concomitant and adjuvant temozolomide for glioblastoma. *N. Engl. J. Med.* 352, 987–996. <https://doi.org/10.1056/NEJMoa043330>.
- Szatmári, T., Lumniczky, K., Désaknai, S., Trajceviski, S., Hídvégi, E.J., Hamada, H., and Sáfrány, G. (2006). Detailed characterization of the mouse glioma 261 tumor model for experimental glioblastoma therapy. *Cancer Sci.* 97, 546–553. <https://doi.org/10.1111/j.1349-7006.2006.00208.x>.
- Tseng, D., Volkmer, J.-P., Willingham, S.B., Contreras-Trujillo, H., Fathman, J.W., Fernhoff, N.B., Seita, J., Inlay, M.A., Weiskopf, K., Miyaniishi, M., and Weissman, I.L. (2013). Anti-CD47 antibody-mediated phagocytosis of cancer by macrophages primes an effective antitumor T-cell response. *Proc. Natl. Acad. Sci. USA* 110, 11103–11108. <https://doi.org/10.1073/pnas.1305569110>.
- van Elsas, M.J., van Hall, T., and van der Burg, S.H. (2020). Future challenges in cancer resistance to immunotherapy. *Cancers* 12, E935. <https://doi.org/10.3390/cancers12040935>.
- von Roemeling, C.A., Wang, Y., Qie, Y., Yuan, H., Zhao, H., Liu, X., Yang, Z., Yang, M., Deng, W., Bruno, K.A., et al. (2020). Therapeutic modulation of phagocytosis in glioblastoma can activate both innate and adaptive antitumor immunity. *Nat. Commun.* 11, 1508. <https://doi.org/10.1038/s41467-020-15129-8>.
- Walker, A.J., Card, T., Bates, T.E., and Muir, K. (2011). Tricyclic antidepressants and the incidence of certain cancers: a study using the GPRD. *Br. J. Cancer* 104, 193–197. <https://doi.org/10.1038/sj.bjc.6605996>.
- Xie, Q., Mittal, S., and Berens, M.E. (2014). Targeting adaptive glioblastoma: an overview of proliferation and invasion. *Neuro Oncol.* 16, 1575–1584. <https://doi.org/10.1093/neuonc/nou147>.
- Xu, Y., Chaudhury, A., Zhang, M., Savoldo, B., Metelitsa, L.S., Rodgers, J., Yustein, J.T., Neilson, J.R., and Dotti, G. (2016). Glycolysis determines dichotomous regulation of T cell subsets in hypoxia. *J. Clin. Invest.* 126, 2678–2688. <https://doi.org/10.1172/JCI85834>.
- Zander, R., Schauder, D., Xin, G., Nguyen, C., Wu, X., Zajac, A., and Cui, W. (2019). CD4+ T cell help is required for the formation of a cytolytic CD8+ T cell subset that protects against chronic infection and cancer. *Immunity* 51, 1028–1042.e4. <https://doi.org/10.1016/j.immuni.2019.10.009>.

## STAR★METHODS

### KEY RESOURCES TABLE

| REAGENT or RESOURCE                                                    | SOURCE         | IDENTIFIER                           |
|------------------------------------------------------------------------|----------------|--------------------------------------|
| <b>Antibodies</b>                                                      |                |                                      |
| <i>InVivo</i> MAb anti-mouse CD8 $\alpha$ (clone 2.43)                 | BioXCell       | Cat #: BE0061; RRID: AB_1125541      |
| <i>InVivo</i> MAb anti-mouse CD4 (clone GK1.5)                         | BioXCell       | Cat #: BE0003-1; RRID: AB_1107636    |
| <i>InVivo</i> Plus anti-mouse IFN $\gamma$ (clone XMG1.2)              | BioXCell       | Cat #: BP0055; RRID: AB_1107694      |
| <i>InVivo</i> MAb anti-mouse VEGFR-2 (clone DC101)                     | BioXCell       | Cat #: BE0060; RRID: AB_1107766      |
| <i>InVivo</i> MAb anti-mouse CXCR3 (CD183) (clone CXCR3-173)           | BioXCell       | Cat #: BE0249; RRID: AB_2687730      |
| <i>InVivo</i> MAb anti-mouse/human VLA-4 (CD49d) (clone PS/2)          | BioXCell       | Cat #: BE0071; RRID: AB_1107657      |
| <i>InVivo</i> MAb anti-mouse PD-L1 (B7-H1)                             | BioXCell       | Cat #: BE0101; RRID: AB_10949073     |
| FITC TNF alpha Rat anti-mouse (cloneMP6-XT22)                          | eBioscience    | Cat #: 11-7321-82; RRID: AB_465418   |
| PE Granzyme B anti-mouse (clone NGZB)                                  | eBioscience    | Cat #: 12-8898-82; RRID: AB_10870787 |
| PerCP-Cyanine5.5 CD3e anti-mouse (clone 145-2C11)                      | eBioscience    | Cat #: 45-00310-82; RRID: AB_1107000 |
| PE/Cyanine7 CD8a anti-mouse (clone 53-6.7)                             | Biolegend      | Cat #: 100722; RRID: AB_312760       |
| Biotin CD11b anti-mouse (clone M1/70)                                  | eBioscience    | Cat#: 13-0112-82; RRID: AB_466359    |
| APC IFN- $\gamma$ anti-mouse (clone XMG1.2)                            | Biolegend      | Cat #: 505810; RRID: AB_315403       |
| APC/Cyanine7 CD45 anti-mouse (clone 30-F11)                            | Biolegend      | Cat#: 103116; RRID: AB_312980        |
| FITC CD62L anti-mouse (clone MEL-14)                                   | Biolegend      | Cat#: 104406; RRID: AB_313093        |
| PerCP-Cyanine5.5 CD11b anti-mouse (clone M1/70)                        | eBioscience    | Cat#: 45-0112-82; RRID: AB_953558    |
| Pacific Orange™ CD8a anti-mouse (clone 5H10)                           | Invitrogen     | Cat#: MCD0830, RRID: AB_10376311     |
| APC CD45 anti-mouse (clone 30-F11)                                     | BD Biosciences | Cat#: 559864; RRID: AB_398672        |
| Pe-Cyanine7 CD3e (clone 145-2C11)                                      | eBioscience    | Cat#: 25-0031-81; RRID: AB_469572    |
| Alexa Fluor® 488 Anti-Stat5 (pY694) anti-mouse (clone 47/Stat5(pY694)) | BD Biosciences | Cat#: 612598; RRID: AB_399881        |
| PE TCF-7/TCF-1 anti-mouse (clone S33-966)                              | BD Biosciences | Cat#: 564217; RRID: AB_2687845       |
| Pacific Blue™ Ki-67 anti-mouse                                         | Biolegend      | Cat#: 652422; RRID: AB_2564490       |
| PerCP-Cyanine5.5 Foxp3 anti-mouse (clone FJK-16s)                      | eBioscience    | Cat#: 45-5773-82; RRID: AB_914351    |
| APC CD3e anti-mouse (clone 145-2C11)                                   | Biolegend      | Cat#: 100312; RRID: AB_312677        |
| Biotin CD4 anti-mouse (clone GK1.5)                                    | Biolegend      | Cat#: 100404; RRID: AB_312689        |
| Pe-Cyanine7 CD4 anti-mouse (clone RM4-5)                               | Biolegend      | Cat#: 100528; RRID: AB_312729        |
| Brilliant Violet 510™ CD11b anti-mouse/human (clone M1/70)             | Biolegend      | Cat#: 101245; RRID: AB_2561390       |
| Alexa Fluor® 488 CRACC/SLAMF7 anti-mouse                               | R&D Systems    | Cat#: FAB46281G                      |
| Brilliant Violet 421™ LAP (TGF- $\beta$ 1) anti-mouse (clone TW7-16B4) | Biolegend      | Cat#: 141407; RRID: AB_2561580       |
| APC-eFluor™ 780 CD45 anti-mouse (clone 30-F11)                         | Biolegend      | Cat#: 47-0451-82; RRID: AB_1548781   |
| Brilliant Violet 650™ CD223 (LAG-3) anti-mouse (clone C9B7W)           | Biolegend      | Cat#: 125227; RRID: AB_2687209       |
| Brilliant Violet 421™ Eomes anti-mouse (clone X4-83)                   | BD Biosciences | Cat#: 567166; RRID: AB_2916483       |
| APC HIF-1 alpha anti-mouse/anti-human (clone 241812)                   | R&D Systems    | Cat#: IC1935A; RRID: AB_1061580      |
| Alexa Fluor™ 488 Arginase 1 anti-mouse/anti-human (clone A1exF5)       | eBioscience    | Cat#: 53-3697-82; RRID: AB_2734831   |
| APC/Cyanine7 IL-10 anti-mouse (clone JES5-16E3)                        | Biolegend      | Cat#: 505036; RRID: AB_2566331       |
| PerCP-Cyanine5.5 Ly-6C anti-mouse (clone HK1.4)                        | eBioscience    | Cat#: 45-5932-82; RRID: AB_2723343   |
| Pacific Blue™ Ly-6G anti-mouse (clone 1A8)                             | Biolegend      | Cat#: 127612; RRID: AB_2251161       |

(Continued on next page)

**Continued**

| REAGENT or RESOURCE                                                                  | SOURCE                    | IDENTIFIER                        |
|--------------------------------------------------------------------------------------|---------------------------|-----------------------------------|
| Alexa Fluor® 647 CD49d anti-mouse (clone R1-2)                                       | Biolegend                 | Cat#: 103614; RRID: AB_528837     |
| FITC CD49d anti-mouse (clone R1-2)                                                   | Biolegend                 | Cat#: 103605; RRID: AB_313037     |
| Alexa Fluor® 647 CXCL9 anti-mouse (clone MIG-2F5.5)                                  | Biolegend                 | Cat#: 515606; RRID: AB_1877135    |
| FITC I-A/I-E anti-mouse (clone M5/114.15.2)                                          | Biolegend                 | Cat#: 107606; RRID: AB_313321     |
| PE CD274 (B7-H1, PD-L1) anti-mouse (clone 10F.9G2)                                   | Biolegend                 | Cat#: 124308; RRID: AB_2073556    |
| PE-Cyanine7 CD11b anti-mouse (clone M1/70)                                           | eBioscience               | Cat#: 25-0112-82; RRID: AB_469588 |
| PerCP/Cyanine5.5 CD86 anti-mouse (clone GL-1)                                        | Biolegend                 | Cat#: 105028; RRID: AB_2074994    |
| APC IL-6 anti-mouse (clone MP-5-20F3)                                                | Biolegend                 | Cat#: 504508; RRID: AB_10694868   |
| PE IL-1 $\alpha$ anti-mouse (clone ALF-161)                                          | Biolegend                 | Cat#: 503203; RRID: AB_315281     |
| FITC CD8a anti-mouse (clone 53-6.7)                                                  | Biolegend                 | Cat#: 100706; RRID: AB_312745     |
| Alexa Fluor® 647 CD8a anti-mouse (clone 53-6.7)                                      | Biolegend                 | Cat#: 100724; RRID: AB_389326     |
| Alexa Fluor® 647 CD4 anti-mouse (clone RM4-5)                                        | Biolegend                 | Cat#: 100530; RRID: AB_389325     |
| FITC CD31 anti-mouse (clone MEC 13.3)                                                | BD Biosciences            | Cat#: 553372; RRID: AB_394818     |
| PE CD31 anti-mouse (clone MEC 13.3)                                                  | BD Biosciences            | Cat#: 553373; RRID: AB_394819     |
| Alexa Fluor® 647 CD206 anti-mouse (clone C068C2)                                     | Biolegend                 | Cat#: 141712; RRID: AB_10900420   |
| PE F4/80 anti-mouse (clone BM8)                                                      | eBioscience               | Cat#: 12-4801-82; RRID: AB_465923 |
| FITC Ki67 anti-mouse (clone 16A8)                                                    | Biolegend                 | Cat#: 652409; RRID: AB_2562140    |
| MECA-79                                                                              | Santa Cruz Biotechnology  | Cat#: sc-19602; RRID: AB_627143   |
| CXCL10/IP-10/CRG-2 anti-mouse                                                        | R&D Systems               | Cat#: AF-466-NA; RRID: AB_2292487 |
| Cleaved Caspase-3 (Asp175) (clone 5A1E)                                              | Cell Signaling Technology | Cat#: 9664; RRID: AB_2070042      |
| CD140b (PDGFRB) anti-mouse (clone APB5)                                              | eBioscience               | Cat#: 14-1402-82; RRID: AB_467493 |
| LC3 anti-mouse (clone 5F10)                                                          | Nanotools                 | Cat#: 0231-100; RRID: AB_2722733  |
| Desmin                                                                               | Abcam                     | Cat#: ab15200; RRID: AB_301744    |
| LAMP1                                                                                | Abcam                     | Cat#: ab24170; RRID: AB_775978    |
| Arginase I (N-20)                                                                    | Santa Cruz Biotechnology  | Cat#: sc-18351; RRID: AB_2258542  |
| MMR/CD206 anti-mouse                                                                 | R&D Systems               | Cat#: AF2535; RRID: AB_2063012    |
| IL-10 anti-mouse (clone JES052A5)                                                    | R&D Systems               | Cat#: MAB417; RRID: AB_2125085    |
| ATG3                                                                                 | Cell Signaling Technology | Cat#: 3415; RRID: AB_2059244      |
| HSP-90 (F-8)                                                                         | Santa Cruz Biotechnology  | Cat#: sc-13119; RRID: AB_675659   |
| GAPDH (clone 14C10)                                                                  | Cell Signaling Technology | Cat#: 2118; RRID: AB_561053       |
| Polyclonal Rabbit Anti-Goat Immunoglobulins/HRP antibody                             | DAKO                      | Cat#: P0449; RRID: AB_2617143     |
| Goat Anti-Rabbit Immunoglobulins/HRP antibody                                        | DAKO                      | Cat#: P0448; RRID: AB_2617138     |
| Goat Anti-Mouse Immunoglobulins/HRP antibody                                         | DAKO                      | Cat#: P0447; RRID: AB_2617137     |
| Anti-rat IgG, HRP-linked antibody                                                    | Cell Signaling Technology | Cat#: 7077; RRID: AB_10694715     |
| Alexa Fluor™ 546 goat anti-Rabbit IgG (H+L) Highly Cross-Adsorbed Secondary Antibody | Invitrogen                | Cat#: A-11035; RRID: AB_2534093   |
| Alexa Fluor™ 647 donkey anti-Goat IgG (H+L) Cross-Adsorbed Secondary Antibody        | Invitrogen                | Cat#: A-21447; RRID: AB_2535864   |
| Alexa Fluor® 647 donkey Anti-Rat IgG H&L                                             | Abcam                     | Cat#: ab150155; RRID: AB_2813835  |
| Purified anti-mouse CD16/32                                                          | Biolegend                 | Cat#: 101302; RRID: AB_312801     |
| Lycopersicon Esculentum (Tomato) Lectin (LEL, TL), DyLight 594                       | Invitrogen                | Cat#: L32471                      |
| Lectin Kit I, Biotinylated                                                           | Vector Laboratories       | Cat#: BK-1000; RRID: AB_2336252   |
| <b>Bacterial and virus strains</b>                                                   |                           |                                   |
| One Shot™ TOP10 Chemically Competent <i>E. coli</i>                                  | Invitrogen                | Cat#: C404010                     |
| LVRshp53 second generation lentivirus                                                | In house                  | This paper                        |

(Continued on next page)

**Continued**

| REAGENT or RESOURCE                                                       | SOURCE                                   | IDENTIFIER                                                |
|---------------------------------------------------------------------------|------------------------------------------|-----------------------------------------------------------|
| <b>Chemicals, peptides, and recombinant proteins</b>                      |                                          |                                                           |
| Imipramine hydrochloride                                                  | Sigma-Aldrich                            | Cat#: I0899                                               |
| (S)-(+)-Clopidogrel hydrogensulfate                                       | Sigma-Aldrich                            | Cat#: SML0004                                             |
| Axitinib (AG 013736)                                                      | Selleckchem                              | Cat#: S1005                                               |
| Sunitinib (SU11248) malate                                                | Selleckchem                              | Cat#: S1042                                               |
| Recombinant B20S (anti-VEGF)                                              | In house                                 | This paper                                                |
| Desloratadine                                                             | Sigma-Aldrich                            | Cat#: D1069                                               |
| Trifluoperazine hydrochloride                                             | Sigma-Aldrich                            | Cat#: T6062                                               |
| HJC0197                                                                   | Cayman Chemicals                         | Cat#: CAY-19092                                           |
| CE3F4                                                                     | Cayman Chemicals                         | Cat#: CAY-17767                                           |
| Histamine                                                                 | MedChemExpress                           | Cat#: Y-B1204                                             |
| CFSE Cell Division Tracker Kit                                            | Biologend                                | Cat#: 422701                                              |
| Dynabeads™ Mouse T-Activator CD3/CD28 for T-Cell Expansion and Activation | Gibco                                    | Cat#: 11452D                                              |
| Brilliant Violet 421™ Streptavidin                                        | Biologend                                | Cat#: 405226                                              |
| Streptavidin, Pacific Orange™ conjugate                                   | Invitrogen                               | Cat#: S32365                                              |
| DAPI                                                                      | Roche                                    | Cat#: 10236276001                                         |
| LIVE/DEAD™ Fixable Violet Dead Cell Stain Kit, for 405 nm excitation      | Invitrogen                               | Cat#: L34964                                              |
| LIVE/DEAD™ Fixable Red Dead Cell Stain Kit, for 488 nm excitation         | Invitrogen                               | Cat#: L23102                                              |
| PrimeScript RT Master Mix                                                 | Takara                                   | Cat#: RR036A                                              |
| miRNeasy Micro Kit                                                        | Qiagen                                   | Cat#: 217084                                              |
| miRNeasy Mini Kit                                                         | Qiagen                                   | Cat#: 217004                                              |
| QuantiNova SYBR Green PCR Kit                                             | Qiagen                                   | Cat#: 208052                                              |
| Pierce™ BCA Protein Assay Kit                                             | Thermo Scientific™                       | Cat#: 23225                                               |
| Fluorescence Mounting Medium                                              | DAKO                                     | Cat#: S302380                                             |
| Recombinant Mouse M-CSF (carrier-free)                                    | Biologend                                | Cat#: 576406                                              |
| ACK Lysing Buffer                                                         | Gibco                                    | Cat#: A1049201                                            |
| Dispase® II (neutral protease, grade II)                                  | Roche                                    | Cat#: 04942078001                                         |
| DNase I recombinant, RNase-free                                           | Roche                                    | Cat#: 04716728001                                         |
| Collagenase A                                                             | Roche                                    | Cat#: 10103578001                                         |
| <b>Critical commercial assays</b>                                         |                                          |                                                           |
| cAMP Assay Kit (Competitive ELISA)                                        | Abcam                                    | Cat#: ab65355                                             |
| EasySep™ Mouse CD11b Positive Selection Kit II                            | StemCell Technologies                    | Cat#: 18970                                               |
| EasySep™ Mouse CD4 <sup>+</sup> T Cell Isolation Kit                      | StemCell Technologies                    | Cat#: 19852                                               |
| EasySep™ Mouse CD8 <sup>+</sup> T Cell Isolation Kit                      | StemCell Technologies                    | Cat#: 19853                                               |
| CD31 MicroBeads, mouse                                                    | Miltenyi Biotec                          | Cat#: 130-097-418                                         |
| Myelin Removal Beads II, human, mouse, rat                                | Miltenyi Biotec                          | Cat#: 130-096-731                                         |
| pHrodo™ Green <i>S. aureus</i> Bioparticles™ Conjugate for Phagocytosis   | Invitrogen                               | Cat#: P35367                                              |
| <b>Deposited data</b>                                                     |                                          |                                                           |
| TCGA glioblastoma (with AffyU133a array)                                  | Goldman et al., 2020                     | <a href="https://xena.ucsc.edu">https://xena.ucsc.edu</a> |
| CHUV EMRs                                                                 | This paper                               | raw data available upon request                           |
| <b>Experimental models: Cell lines</b>                                    |                                          |                                                           |
| 293T/17 [HEK 293T/17]                                                     | ATCC                                     | Cat#: CRL-11268™; RRID: CVCL_1926                         |
| Mouse GBM-derived cancer cells                                            | Derived in house from the LVRshp53 model | This paper                                                |
| DF-1:RCAS-hPDGF-B-HA                                                      | provided by J.A. Joyce                   |                                                           |

(Continued on next page)

| REAGENT or RESOURCE                                                                                                | SOURCE                                | IDENTIFIER                                                                                                                              |
|--------------------------------------------------------------------------------------------------------------------|---------------------------------------|-----------------------------------------------------------------------------------------------------------------------------------------|
| <b>Continued</b>                                                                                                   |                                       |                                                                                                                                         |
| Experimental models: Organisms/strains                                                                             |                                       |                                                                                                                                         |
| Mouse: FVB.GFAP-Cre                                                                                                | In house                              | This paper                                                                                                                              |
| Mouse: GFAP-HRasV12; GFAP-CRE; GFAP-LUC; p53 <sup>flox/wt</sup>                                                    | In house                              | This paper                                                                                                                              |
| Mouse: GFAP-HRasV12; GFAP-CRE; GFAP-LUC; p53 <sup>flox/flox</sup>                                                  | In house                              | This paper                                                                                                                              |
| Mouse: C57BL/6J (JAX® Mice Strain)                                                                                 | Charles River                         | Strain Code: 632                                                                                                                        |
| Mouse: FVB/NCrl                                                                                                    | Charles River                         | Strain Code: 207                                                                                                                        |
| Mouse: Fox Chase SCID Beige Mouse                                                                                  | Charles River                         | Strain code: 250                                                                                                                        |
| Mouse: iBIP2 ( <i>TetO-BRAF<sup>v600e</sup>, Tyr-CreERT2, Rosa26-Lox-Stop-Lox-rtTA, Pten-fl/fl, Cdkn2a-fl/fl</i> ) | In house                              | This paper                                                                                                                              |
| Mouse: Nestin-Tv-a; <i>Ink4a/Arf<sup>-/-</sup></i> (Tg(NES-TVA)J12Ech; Cdkn2a <sup>tm1Rdp</sup> )                  | provided by J.A. Joyce                |                                                                                                                                         |
| Oligonucleotides                                                                                                   |                                       |                                                                                                                                         |
| MISSION® siRNA Universal Negative Control #1                                                                       | Sigma-Aldrich                         | Cat#: SIC001                                                                                                                            |
| MISSION® Predesigned si <i>Hrh1</i>                                                                                | Sigma-Aldrich                         | NM_008285; siRNA ID: SASI_Mm01_00058730                                                                                                 |
| MISSION® Predesigned si <i>Hrh1</i>                                                                                | Sigma-Aldrich                         | NM_008285; siRNA ID: SASI_Mm01_00058731                                                                                                 |
| Primers: see <a href="#">Table S1</a>                                                                              |                                       |                                                                                                                                         |
| Recombinant DNA                                                                                                    |                                       |                                                                                                                                         |
| ATG3 Mission shRNA plasmid                                                                                         | Sigma-Aldrich                         | ID: TRCN0000247440                                                                                                                      |
| pMD2G                                                                                                              | Addgene                               | Cat#: 12259                                                                                                                             |
| pCMVR8.74                                                                                                          | Addgene                               | Cat#: 22036                                                                                                                             |
| pTomo H-rasV12-shp53-Luc                                                                                           | provided by I. Verma                  |                                                                                                                                         |
| Software and algorithms                                                                                            |                                       |                                                                                                                                         |
| QuPath (version 0.2.3)                                                                                             | <a href="#">Bankhead et al., 2017</a> | <a href="https://qupath.github.io">https://qupath.github.io</a>                                                                         |
| FlowJo (version 10.7.2)                                                                                            | BD                                    | <a href="https://www.flowjo.com">https://www.flowjo.com</a>                                                                             |
| RStudio (version 2022.02.1 Build 461)                                                                              | The R Foundation                      | <a href="https://www.r-project.org/">https://www.r-project.org/</a>                                                                     |
| survminer (version 0.4.9)                                                                                          |                                       | <a href="https://cran.r-project.org/web/packages/survminer/index.html">https://cran.r-project.org/web/packages/survminer/index.html</a> |
| GraphPad Prism (version 9.3.1)                                                                                     | Dotmatics                             | <a href="https://www.graphpad.com">https://www.graphpad.com</a>                                                                         |

## RESOURCE AVAILABILITY

### Lead contact

Further information and requests for resources should be directed to the lead contact, Douglas Hanahan ([douglas.hanahan@epfl.ch](mailto:douglas.hanahan@epfl.ch)).

### Materials availability

This study did not generate new unique reagents.

### Data and code availability

The raw data of EMRs will be made available upon request.

## METHOD DETAILS

### Study design

This study was designed to assess the potential antitumoral impact of combined therapy with autophagy-hyperactivating agents and angiogenesis inhibitors in glioblastoma. We evaluated the efficacy of combinatorial treatments principally in a lentivirally-induced (LVRshp53) model, as well as in transgenic (GRLp53het & GRLp53flko ([Shchors et al., 2015](#)), PDG ([Hambardzumyan et al., 2009](#); [Pyonteck et al., 2013](#))) and orthotopic cell transplant (GL261 ([Szatmári et al., 2006](#))) mouse models of glioblastoma and focused on their potential role in tumor vasculature normalization and immunomodulatory actions. All animal studies were performed in accordance with protocols approved by the Veterinary Authorities of the Canton Vaud.

The design of the experimental trials and follow-up analyses is presented in the Materials and Methods. For detailed information on sample size and statistical methods, please see the presented figures or associated figure legends.

### Mouse models

To initiate gliomas in LVRshp53 mice, GFAP-Cre mice in the FVBn genetic background (both males and females) were intracranially injected at 8–11 weeks of age with the pTomo HRasV12-Luc-shp53 lentivirus, using a stereotactic frame under full anesthesia with a mix of Fentanyl, Midazolam and Medetomidine. The injections were performed using the following coordinates: 2.0 mm anterior/posterior, 1.5 mm medial/lateral, and 2.3 mm dorsal/ventral from the bregma. A small volume of virus was injected (0.8  $\mu$ L,  $1 \times 10^8$  international units) at a rate of 0.1  $\mu$ L/min with an automatic pump. Animals were revived from anesthesia with a triple-shot mix of Naloxon, Flumazenil and Atipamezol. The generation and characterization of the GRLp53het (GFAP-HRasV12; GFAP-CRE; GFAP-LUC; p53<sup>fl<sup>ox</sup>/wt</sup>) and GRLp53flko (GFAP-HRasV12; GFAP-CRE; GFAP-LUC; p53<sup>fl<sup>ox</sup>/fl<sup>ox</sup></sup>) mouse lines have been described previously (Shchors et al., 2015), as has the initiation of PDG glioma tumors (Pyonteck et al., 2013). For the orthotopic transplantation model involving LVRshp53 tumor-derived glioma cells, 50,000 cells in Neurobasal medium, (ThermoFisher Scientific) were engrafted similarly to the lentivirus into anaesthetized FVBn or SCID animals. For the GL261 syngeneic model, C57BL/6 were intracranially transplanted with 100,000 cells using the same protocol. A transgenic mouse model (iBIP2) of mutant BRAF-driven melanoma was generated from the previously described iBIP model (Neubert et al., 2018) by replacing the germ-line knockout of *Cdkn2A* with a floxed allele, producing a mouse of the following genotype: *TetO-BRAF<sup>V600e</sup>*, *Tyr-CreERT2*, *Rosa26-Lox-Stop-Lox-rtTA*, *Pten-fl/fl*, *Cdkn2a-fl/fl*. Topical application of tamoxifen induces the development of melanoma, as will be described in further depth elsewhere.

### Statistics

Statistical analyses were carried out using GraphPad Prism 9. Data are reported as mean  $\pm$  SEM, unless otherwise stated in figure legends. p-values are reported in the figures or figure legends and were assessed with unpaired Mann-Whitney test to compare the means of two groups or one-way ANOVA for multiple groups comparisons, unless otherwise stated. For survival analyses, log-rank (Mantel–Cox) test was performed. Statistical significance is indicated as \*p<0.05, \*\*p<0.01, \*\*\*p<0.001, \*\*\*\*p<0.0001.

### Production and titration of lentiviral particles

High-titer lentiviral particles were produced as previously described (Salmon and Trono, 2006). Briefly, 293T cells were seeded a day before the transfection at  $9 \times 10^6$ /15-cm dish. The transfection mix for 1 plate was obtained by mixing 22.5  $\mu$ g transfer vector plasmid (provided by I. Verma, pTomo H-rasV12-shp53-Luc), 7.9  $\mu$ g pMD2G (Addgene, 12259) and 14.6  $\mu$ g pCMVR8.74 (Addgene, 22036) with 0.66 mL 0.1XTE, 0.35 mL H<sub>2</sub>O, 113  $\mu$ L CaCl<sub>2</sub> 2.5M and 1.14 mL 2X HeBS. The precipitate was added dropwise and the dishes incubated overnight. On the next day, the media was replaced and the virus was collected 3–4 times in 8–12 hour increments. The supernatant was pooled, filtered using a 0.22  $\mu$ m filter unit and ultracentrifuged at 22,000 rpm (Beckman Coulter, SW32Ti rotor). The viral particles were then resuspended in PBS and stored at  $-80^\circ\text{C}$ . For the titration of the particles, HEK 293 T cells were transduced with various amounts of virus and analyzed by FACS based on mCherry reporter expression (Salmon and Trono, 2006).

### Cell culture

For intracranial injections and co-culture experiments, mouse brain cancer cells were harvested from LVRshp53 animals and cultured as described previously (Shchors et al., 2015). Melanoma cancer cells were derived from iBIP2 transgenic mouse model and cultured in RPMI medium supplemented with 10% fetal bovine serum, 1% penicillin-streptomycin and 2  $\mu$ g/mL doxycycline. To generate the knockdown of ATG3 in mouse GBM cells, we used a predesigned shRNA (TRC clone ID: TRCN0000247440, MISSION shRNA, Sigma-Aldrich). The viral particles were produced as above and added to the cells for overnight incubation with polybrene at 8  $\mu$ g/mL. The next day, the media was changed and the cells allowed to recover for 48 hours before selection with puromycin at 10  $\mu$ g/mL.

### Bioluminescent monitoring

Tumor growth was monitored with bioluminescence, starting at week 8 for the GRLp53het and GRLp53flko mice and at weeks 2 post-surgery for the LVRshp53 lentivirus model. Images were obtained five minutes after injection of a PBS solution containing firefly D-luciferin potassium salt (Biosynth), using an IVIS-100 Imaging System, applying the following parameters: medium binning, open emission filter, F/stop 1, and 1-minute exposure. Luminescent images were analyzed using Living Image 3.2 Analysis software. The criteria for enrollment into therapeutic trials was a luminescent value of 3.5 to  $4.5 \times 10^6$  photons per second per square centimeter for GRLp53het and GRLp53flko mice and 1 to  $1.5 \times 10^6$  photons per second per square centimeter for LVRshp53 mice in the brain regions of interest.

### MRI imaging

Tumor growth of PDG and GL261 gliomas was monitored with T2-weighted 1H MRI scans on a 3T MRI machine (Bruker). The mice were enrolled into therapeutic trials when the tumors reached approximately 15mm<sup>3</sup> of volume.

### Therapeutic trials

All of the animals enrolled in the trials were included in the analyses. Mice were randomly assigned to the experimental cohorts. Imipramine (Sigma I0899) was prepared in 0.9% NaCl physiological solution and administered orally once a day at 40 mg/kg. Ticlopidine (Sigma T6654) and clopidogrel (Sigma SML0004) solutions were formulated in 0.9% NaCl and injected intraperitoneally once a day at 1 mg/kg. The anti-mouse VEGF monoclonal antibody (B20S), a mouse biosimilar to anti-human VEGF (bevacizumab), was generated

based on a previously published protocol using the B20-4.1 sequence (Liang et al., 2006). The piggy-Bac transposon system was utilized to produce recombinant B20S in 293 cells (32). B20S was affinity-purified, and stored in a buffer comprising of 50 mM sodium phosphate and 150 mM NaCl (pH 7.0). Mice were dosed twice a week at 20 mg/kg. Axitinib (Selleckchem S1005) was prepared in 0.5% carboxymethylcellulose/H<sub>2</sub>O-HCl (pH 2.0) and administered by oral gavage twice daily at 30 mg/kg. Sunitinib (Selleckchem S1042) was formulated in 0.5% carboxymethylcellulose, 0.4% Tween 80, 1.8% NaCl, 0.9% benzyl alcohol dissolved in reverse osmosis deionized water (pH 6.0) and administered once daily by oral gavage at 40 mg/kg. Trifluoperazine hydrochloride (Sigma T6062) in saline was administered intraperitoneally once a day at 40 mg/kg. The anti-mouse CD8 (clone 53-6.72), the anti-mouse CD4 (clone GK1.5), the anti-mouse IFN $\gamma$  (clone XMG1.2), the anti-mouse VEGFR2 (clone DC101), the anti-mouse CXCR3 (clone CXCR3-173), the anti-mouse VLA-4 (CD49d, clone PS/2), and the anti-PD-L1 (clone 10F.9G2) monoclonal antibodies were purchased from BioXcell and intraperitoneally injected twice a week at 250  $\mu$ g/mouse/dose.

### Harvesting of mouse tissues

Animals were euthanized at specific time points described in the figure legends. For immunofluorescence staining, mice were perfused by intracardiac inoculation with phosphate-buffered saline (PBS, 10mM, pH 7.4). Brain tissues were embedded in O.C.T (Tissue-Tek) and sectioned with a cryostat (CM1950 or CM3050S Leica) to produce 8 $\mu$ m or 16 $\mu$ m-thick tissue sections. For immunohistochemical analyses, each mouse was treated before euthanasia by trans-cardiac perfusion with PBS and formalin. Excised whole brains were then fixed with 4% paraformaldehyde solution overnight at 4°C, washed with 70% ethanol, dehydrated (Histokinet Leica ASP2000), and then embedded in paraffin and cut into 4 $\mu$ m to 10 $\mu$ m-thick sections using a microtome (Microm HM325). For RNA and protein isolation, brain tumor tissues were snap-frozen and mechanically disrupted using stainless steel beads (69989, Qiagen) in a TissueLyser II (Qiagen).

### RNA isolation, reverse transcription, and quantitative RT-PCR

RNA from cells and tissues was isolated with the miRNeasy Mini Kit (Qiagen) and miRNeasy Tissue/Cells Advanced Mini Kit (Qiagen), respectively. All of the procedures were performed according to the manufacturer's instructions. A total of 500 ng of RNA was used for cDNA synthesis using the PrimeScript RT Master Mix (RR036A, TaKaRa). qRT-PCR was performed using the Rotor-Gene SYBR Green Master Mix (Qiagen).

### Western blotting

Cells or tissues were lysed in RIPA buffer (ThermoFisher Scientific) with the addition of protease (cOmplete Mini, EDTA-free, Sigma) and phosphatase inhibitors (PhosSTOP, Sigma). Total protein extracts (20–30 $\mu$ g) were separated using Mini-PROTEAN precast gels and subsequently transferred onto PVDF membranes. Membranes were blocked in 5% Bovine Serum Albumin/TBST for 0.5–1 hour at room temperature and probed with primary antibodies prepared in 5%BSA/TBST overnight at 4°C. The following day, the membranes were incubated with secondary HRP-conjugated antibodies for 1 hour in room temperature and visualized with WesternBright Sirius (Advansta) using Fusion FX7. The following primary antibodies were used for immunoblotting: ARG1 (Santa Cruz Biotechnology, sc-18351), MRC1 (R&D Systems, AF2535), IL10 (R&D Systems, MAB417), ATG3 (Cell signaling, 3415), HSP90 (Santa Cruz Biotechnology, sc-13119) and GAPDH (Cell signaling, 14C10). HRP-conjugates secondary antibodies used for immunoblotting: anti-goat (DAKO, P0449), anti-rat (Cell Signaling, 7077), anti-rabbit (DAKO, P0448) and anti-mouse (DAKO, P0447).

### BMDM isolation and polarization

To generate bone marrow-derived macrophages, femurs and tibiae of 6-week old wild-type FVBn female mice were used. Cells were flushed by centrifuging the bones cut at the knee joint. The isolate was filtered through a 40 $\mu$ m cell strainer and red blood cells were lysed with the ACK Lysing Buffer (ThermoFisher Scientific). Cells were plated in RPMI +10% FBS +1% Pen/Strep +50 ng/mL recombinant mouse CSF-1. BMDMs were polarized at day 7 using cytokines or by cancer cells plated into the transwell of the co-culture assay. For the M1-like polarization, 100 ng/mL LPS and 200 U/mL IFN $\gamma$  were used. To obtain the M2-like phenotype, 20 ng/mL IL-4 was used. BMDMs were polarized for 24 hours and then treated with different agents (see below) for 24 hours. For the co-culture experiments, mouse glioma cells were seeded at  $1 \times 10^5$  cells/mL into a 0.4  $\mu$ m insert a day before the polarization experiment. The next day the inserts were transferred to a 6-well plate seeded with unpolarized macrophages for 24 hours and then treated with different agents for 24 hours. The following agents were used for the treatments: imipramine (40 $\mu$ M, I0899 Sigma-Aldrich), desloratadine (10 $\mu$ M, D1069 Sigma-Aldrich), trifluoperazine (10 $\mu$ M, T6062 Sigma-Aldrich), HJC0197 (25 $\mu$ M, CAY-19092-5 Cayman Chemical), Ce3f4 (50 $\mu$ M, CAY-17767-10 Cayman Chemical) and histamine (50 $\mu$ M, HY-B1204 MedChemExpress). Small interfering RNA (siRNA) constructs were purchased from Sigma-Aldrich (MISSION predesigned siRNA; siCTRL SIC001, siHRH1 #1 SASI\_Mm01\_0005-8730, siHRH1 #2 SASI\_Mm01\_0005\_8731). Cells were reverse-transfected with 25nmol of siRNA using Lipofectamine RNAiMAX (Invitrogen) in OptiMEM Reduced Serum Medium (Gibco).

### Cell isolation and coculture experiments

Endothelial cells were isolated from the mouse tumors following the CD31 MicroBead protocol (Miltenyi Biotec, ref. 130-097-418).

CD4 and CD8 T cells were magnetically isolated from the spleen using EasySep mouse isolation kits (StemCell Technologies, ref. 19852 and 19853, respectively) according to the manufacturer's protocol. T lymphocytes were labeled with Carboxyfluorescein



Succinimidyl Ester (CFSE; Biologend, 422701) at 1  $\mu$ M for 6 minutes, resuspended in the RPMI media containing 10%FBS, 1%Pen-Strep, NEAA and  $\beta$ -mercaptoethanol, and activated with the CD3/CD28 Dynabeads (ThermoFisher, 11456D). T cells were then plated at 200,000 cells/well in a 96-well plate.

CD11b cells were isolated from tumors by following the tissue harvesting and digestion protocol, as described in the sections on harvesting of mouse tissues and flow cytometry. Myeloid cells were then isolated following the protocol for the EasySep Mouse CD11b Positive Selection Kit II (StemCell Technologies, ref. 18970). After isolation, cells were plated with CD4 or CD8 T cells at a 1:1 ratio. After 72 hours of coculture, the CFSE-low T lymphocytes were stained with the live/dead cell viability reagent (LIVE/DEAD Fixable Violet Dead Cell Stain Kit, Invitrogen) for 10 minutes on ice and counted using flow cytometry (Gallios, Beckman Coulter).

### Ex vivo phagocytosis assay

Tumors were harvested and digested (following the protocols described in the sections on harvesting of mouse tissues and flow cytometry), and subjected to myelin removal (Myelin Removal Beads II, human, mouse, rat, ref. 130-096-731). Cell suspensions were then stained as described in the flow cytometry protocol and sorted for CD45<sup>+</sup>CD11b<sup>+</sup> and CD49d<sup>+</sup> or CD49d<sup>-</sup> (MoFlo Astrios EQ). 20,000 FACS-sorted CD49d<sup>+</sup>/<sup>-</sup> myeloid cells were then plated in a 96-well plate, allowed to rest for 20 minutes at 37°C, spun down and resuspended in 100  $\mu$ L pHrodo-green *S. aureus* bioparticles (ThermoFisher, ref. P35367). After 1.5 hours of incubation, GFP high cells were counted on flow cytometry (Gallios, Beckman Coulter).

### cAMP ELISA

Brain tumor tissues (25 mg each) were snap frozen in 0.1M HCl and homogenized with stainless steel beads in Qiagen TissueLyser II. cAMP concentrations were measured with the cAMP Direct Immunoassay Kit (ab65355, Abcam) according to the manufacturer's protocol.

### Histology

*For immunofluorescence*, frozen sections were dried and fixed in ice-cold methanol at  $-20^{\circ}$ C for 10 minutes or fixed with 4% Paraformaldehyde for 10 minutes and then incubated in 0.1% Triton X-100 for 10 minutes to reveal intracellular proteins. Slides were then washed in PBS, blocked in 5% BSA/PBS for 30 minutes at room temperature and incubated with primary antibodies overnight at 4°C. Samples were stained with CD8 (1:200, eBioscience), FITC CD8 (1:100, Biologend), PDGFR- $\beta$  (1:100, eBioscience), Ki67 (1:100, Abcam), CD31 (1:50, Dianova), PE CD31 (1:200, Biologend), FITC CD31 (1:200, Biologend), CC-3 (1:100, Cell Signaling Technology), Desmin (1:200, Abcam), Alexa Fluor 647 MECA-79 (1:200, Santa Cruz Biotechnology), LAMP-1 (1:100, abcam), LC3 (1:100, Nanotools), HIF-1 $\alpha$  (1:200, Proteintech), CXCL10 (1:200, R&D Systems), PE F4/80 (1:100, eBioscience), FITC CD45 (1:200, Biologend), PE PD-L1 (1:100, Invitrogen), Alexa Fluor 647 CD206 (1:200, Biologend), Alexa Fluor 647 CD8 (1:200, Biologend) and Alexa Fluor 647 CD4 (1:200, Biologend). The following day, sections were washed. Sections that were stained with unconjugated antibodies were incubated with the appropriate secondary fluorochrome-coupled antibodies for 1 hour at room temperature. The following secondary antibodies were used for immunofluorescence: anti-rabbit Alexa Fluor 546 (A11035, Invitrogen), anti-goat Alexa Fluor 647 (A21447, Invitrogen), and anti-rat (ab150155, Abcam). Prior to mounting with Dako fluorescence mounting medium, tissue sections were counterstained with DAPI (1:5000 dilution of 5 mg/mL stock).

*For histological assessment*, staining with hematoxylin and eosin was performed. Slides were deparaffinized with xylene, rehydrated with a graded series of ethanol and incubated in hematoxylin for 5 minutes. The samples were then incubated for few seconds in 1% acid ethanol, rinsed with water and immersed in eosin stain for 1 minute. After washing in water, tissue sections were dehydrated in ascending alcohol solutions and mounted with Eukitt Quick-hardening mounting medium (Sigma).

*For staining of mouse tissues with mouse monoclonal antibodies*, the M.O.M. kit (Vector Labs) was used. Briefly, slides were blocked with avidin/biotin, followed by blocking with the M.O.M. mouse IgG Blocking Reagent, and primary antibodies were prepared by incubation in M.O.M. diluent reagent overnight at 4°C. The next day, slides were washed, incubated in M.O.M. Biotinylated Anti-Mouse IgG Reagent, followed by incubation with fluorescent streptavidin conjugates for 45 minutes.

*For lectin staining to visualize the functional blood vasculature*, mice were intravenously injected with 100  $\mu$ g/100  $\mu$ L of biotinylated lectin (BK-1000, Vector Laboratories) or DyLight 594-conjugated lectin (L32471, ThermoFisher) 20 minutes before the anesthesia. Brains were then collected, dissected and processed for immunofluorescence staining.

Images were variously acquired with a Leica DM5500B fluorescent microscope, a Zeiss LSM700 UP confocal microscope, or one of two available slide scanners: a Zeiss Axioscan Z.1 and an Olympus VS120. The analysis of staining was performed with Fiji-ImageJ software or QuPath (Bankhead et al., 2017).

### Quantification of tissue staining

Necrotic and DAPI-negative areas were excluded.

#### For total CD8<sup>+</sup> T cells, CD4<sup>+</sup> T cells, and CC-3<sup>+</sup> cells

Using QuPath software, a tumor area was annotated as a region of interest. Positive cell detection was used with an intensity threshold >100. Using Fiji-ImageJ software, a Gaussian blur was applied (sigma = 2) to subtract the noise. The binary masks were created by applying a manual threshold for the positive signal (B&W). The Watershed function was utilized to avoid touching objects. The number of cells was obtained by applying 'analyze particle' function with a >100 pixels surface particle size.

#### **For CD31<sup>+</sup> area**

The area of blood vessels was obtained by applying a binary mask and a manual threshold (B&W) for the CD-31 positive signal.

#### **For Lectin+CD31<sup>+</sup>, PDGFRb+CD31<sup>+</sup>, and Desmin+CD31<sup>+</sup> colocalization**

The binary masks were created by applying a manual threshold for the positive signal (B&W). The double-positive area was determined with the Image Calculator using the 'AND' operator between CD31 and Lectin/PDGFRb/Desmin masks and divided by the total CD31<sup>+</sup> area.

#### **For CD8<sup>+</sup> T cell proximity to tumor blood vessels and HIF1a-positive areas**

Images were analyzed using the QuPath software (version 0.2.3) using groovy scripts. Briefly, the script (cf DistToHypoxic.groovy or DetectVesselsClassifyCellMeasureDistance.groovy) makes use of 1) cell detection in the DAPI channel with an object classifier to detect CD8<sup>+</sup> cells (cf cd8+ test1.json), 2) then applying a pixel classifier to segment CD31<sup>+</sup> (cf Vessel.json) or hypoxic areas (cf Hypoxic\_classifier.json) and finally 3) measuring distances of cells to the nearest hypoxic area.

#### **For distance of CD31-positive cells to HIF1a-positive regions**

Images were analyzed using the QuPath software (version 0.2.3) using groovy scripts. Briefly, the script is makes use of 1) the pixel classifier to segment CD31<sup>+</sup> areas (cf Vessel.json), 2) a pixel classifier to segment hypoxic areas (cf Hypoxic\_classifier.json) and finally 3) measuring distances of CD31-positive areas to the nearest hypoxic area.

#### **For LAMP1+LC3+ colocalization**

Colocalization was analyzed using the JACoP plug-in for ImageJ software (Bolte and Cordelières, 2006). Threshold values were based on the single-stained and secondary antibody-only controls.

#### **Flow cytometry**

To obtain a single cell suspension, tumors were finely chopped, digested for 30 minutes using dispase (0.85 U/mL, Roche), collagenase A and DNase I (144 U/mL, Roche) in DMEM-F12 medium with intermittent shaking at 37 degrees, and then passed through a 70µm cell strainer. Tumor-infiltrating leukocytes were isolated by Percoll gradient centrifugation (800xg for 45 minutes with no brake), collected at the interphase between 40% and 80% Percoll (GE Healthcare) and washed twice with FACS buffer (2%FBS/PBS). To monitor CD8 depletion, peripheral blood was collected into EDTA-coated tubes, and red blood cells were lysed using the ACK lysis buffer (Gibco). Cell pellets were washed twice in PBS and resuspended in FACS buffer. Cell suspensions were blocked with anti-CD16/32 (clone 93, Biologend) for 10 minutes and labeled with live/dead cell viability reagent (LIVE/DEAD Fixable Red Dead Cell Stain Kit, Invitrogen) for 10 minutes on ice. For surface staining, cells were incubated with the antibodies diluted in FACS buffer on ice for 15 minutes. Fluorophore-conjugated streptavidin was used for detection of biotinylated antibodies: SA BV421 (405226, Biologend) and SA PacO (S32365, Invitrogen). To perform intracellular immuno-staining, mice were treated with 250µg Brefeldin A for 6 hours prior to euthanasia. Cells were fixed and permeabilized with a Foxp3/Transcription Factor Staining Buffer Set (ThermoFisher Scientific) according to the manufacturer's protocol. Intracellular staining was carried out in Perm/Wash buffer overnight at 4 degrees. After staining, cells were washed and resuspended in FACS buffer. The compensation was performed using OneComp eBeads (Invitrogen). Samples were run on a Gallios cytometer (Beckman Coulter) or a CytoFLEX S (Beckman Coulter), and all subsequent compensation and gating was performed using FlowJo software. The following antibodies were used for flow cytometry: CD45 (clone 30-F11, Biologend), B220 (clone RA3-6B2, eBioscience), CD3 (clone 145-2C11, eBioscience), CD8 (clone 5H10, Invitrogen), CD8 (clone 53-6.7 Biologend), IFN $\gamma$  (clone XMG1.2, Biologend), TNF $\alpha$  (clone MP6-XT22, Invitrogen), Ki67 (16A8, Biologend), TCF7/TCF1 (clone S33-966, Biologend), STAT5 (clone 47/Stat5(pY694), BD Biosciences), Granzyme B (clone NGZB, Invitrogen), Granyme B (clone QA16A02, Biologend), CD4 (RM4-5, Biologend), CD4 (GK1.5, Biologend), SLAMF7 (clone #520914, R&D Systems), FoxP3 (clone FJK-16s, eBioscience), HIF-1 $\alpha$  (clone #241812, R&D Systems), TGF $\beta$  (clone TW7-16B4, Biologend), CD62L (clone MEL-14, Biologend), CD44 (clone IM7, Biologend), CD49d (clone R1-2, Biologend), CXCL9 (clone MIG-2F5.5, Biologend), Ly6C (clone HK1.4), Ly6G (clone 1A8, Biologend), CD11b (clone M1/70, Biologend), Arg1 (clone A1exF5, Invitrogen), IL10 (clone JES5-16E3, Biologend), IL1 $\alpha$  (clone ALF-161, Biologend), IL6 (clone MP5-20F3, Biologend), CD86 (clone GL-1, Biologend), MHC-II (clone M5/114.15.2, Biologend), and PD-L1 (clone MIH5, Invitrogen), EOMES (clone X4-83, Becton Dickinson), LAG3 (clone C9B7W, Biologend).

#### **Survival analysis in the TCGA glioblastoma dataset**

We accessed the data through the UCSC Xena platform (Goldman et al., 2020). We selected the TCGA GBM cohort with AffyU133a array (n = 539).

[[https://gdac.broadinstitute.org/runs/stddata\\_\\_2016\\_01\\_28/data/GBM/20160128/](https://gdac.broadinstitute.org/runs/stddata__2016_01_28/data/GBM/20160128/)]

The data for median were downloaded from [xena.ucsc.edu](https://xena.ucsc.edu) and loaded to RStudio. The Kaplan Meier analyses of progression-free survival and overall survival were performed using RStudio 2022.02.01, with the package survminer version 0.4.9 (<https://cran.r-project.org/web/packages/survminer/index.html>).

#### **Glioblastoma patient survival and antihistamine treatment**

We identified glioblastoma patients treated at the University Hospital of Lausanne between June 2005 and October 2021. Patient dossiers (digitalized paper records of electronic medical records, EMRs) were validated for the diagnosis of glioblastoma. We excluded grade II tumors which transformed into higher-grade tumors and grade III brain tumors, including oligodendrogliomas and grade 3 astrocytomas. We then checked for the comedication available for each patient. We selected the antihistamine

cohort of patients (n = 29). We validated that the other patients did not receive antihistamine medication and used it as the control group (n = 226). The date of diagnosis was the date of reception of the tumor material at pathology. The date of death was defined as recorded in the EMRs (censor = 1) or the last follow-up when the patient had at which the patient was alive (censor = 0).

The Kaplan Meier analysis was performed using RStudio 2022.02.01, with the package survminer version 0.4.9 (<https://cran.r-project.org/web/packages/survminer/index.html>).

**Cancer Cell, Volume 40**

**Supplemental information**

**Cancer cell autophagy, reprogrammed  
macrophages, and remodeled vasculature  
in glioblastoma triggers tumor immunity**

**Agnieszka Chryplewicz, Julie Scotton, Mélanie Tichet, Anook Zomer, Ksenya Shchors, Johanna A. Joyce, Krisztian Homicsko, and Douglas Hanahan**

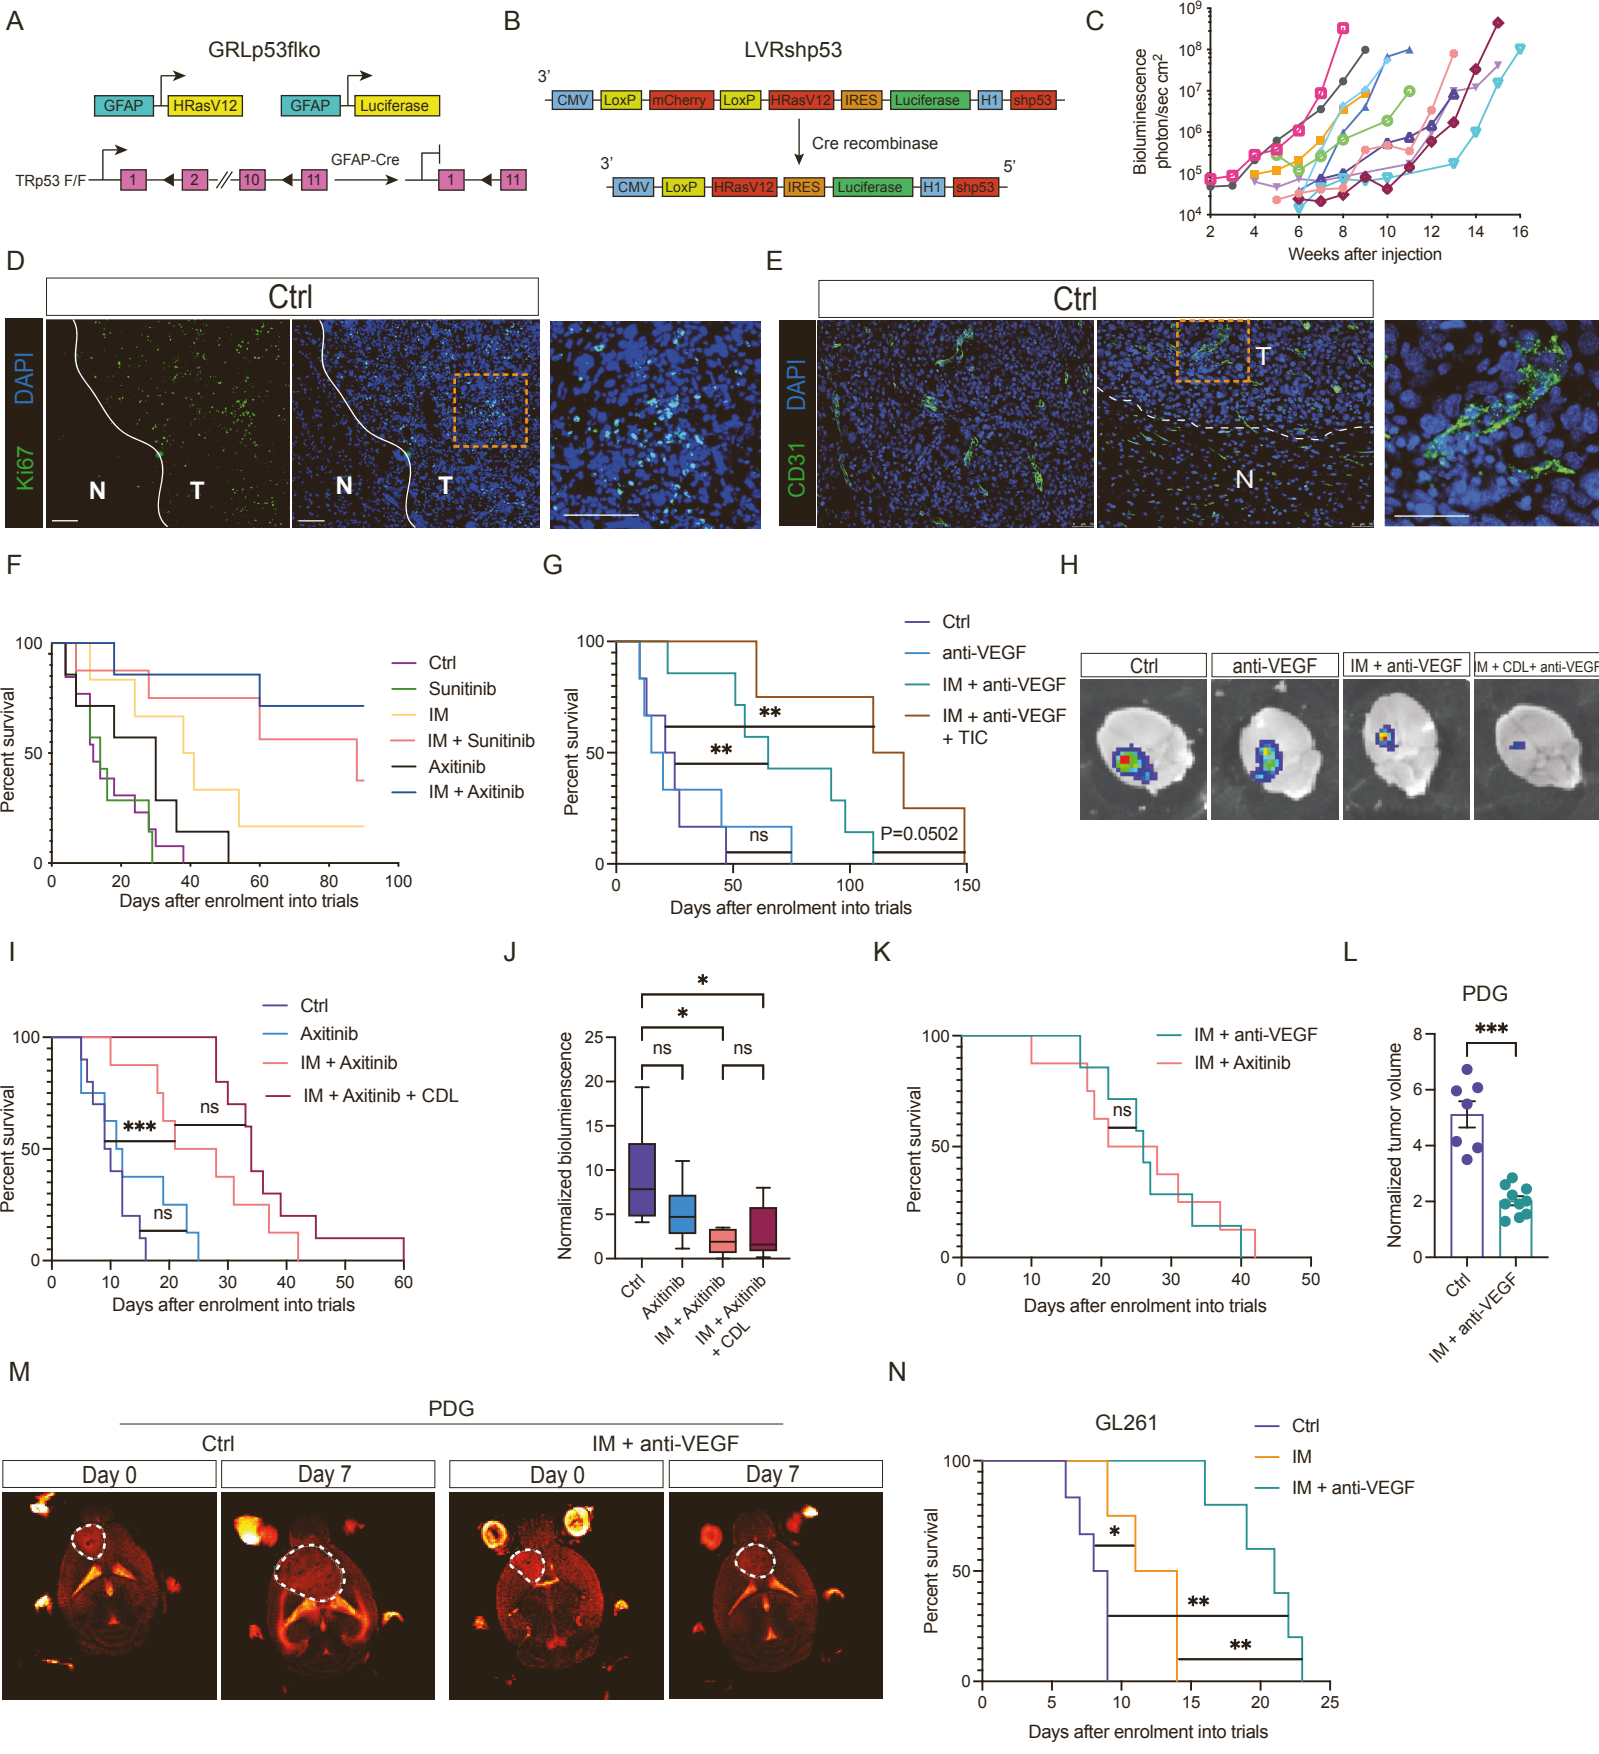

**Fig S1: Characterization of the GBM mouse models and survival trials illustrating the survival benefit from IM + anti-VEGF therapy, related to Fig 1**

- A) Diagram of the transgenes in the previously described (Shchors et al., 2015) transgenic mouse model of GBM.
- B) Diagram of the pTomo HRasV12-shp53-Luc lentivirus vector, adapted from a previously described vector (Friedmann-Morvinski et al., 2016) by the addition of luciferase and shp53. The mCherry gene cassette keeps the HRasV12 gene in an off-state. When Cre recombinase deletes the mCherry cassette, HRasV12 is expressed together with luciferase and shp53.
- C) Temporal evolution of bioluminescence after inoculation of the GBM-inducing lentivirus into GFAP-Cre transgenic mice. Each line represents an individual animal.
- D) Ki67 (green) staining showing a high proliferative index in a representative LVRshp53 GBM tumor. T: Tumor, N: Normal adjacent brain. Scale bar 50 $\mu$ m. The image is representative of a whole tissue scan of 4 untreated tumors.
- E) Representative images of CD31 (green) staining showing hyper- and abnormal vasculature in a LVRshp53 tumor, compared to normal adjacent tissue visible in the right panel. Scale bar 50 $\mu$ m. The image is illustrative of a full tumor section of 4 untreated tumors.
- F) Kaplan-Meier survival analysis of tumor-bearing GRLp53het transgenic mice in cohorts treated as indicated. Ctrl (n=13), Sunitinib (n=7), IM (n=6), IM + Sunitinib (n=8), Axitinib (n=7), IM + Axitinib (n=7).
- G) Survival of tumor-bearing GRLp53flko transgenic mice subjected to the indicated treatments. Ctrl (n=6), anti-VEGF (n=6), IM + anti-VEGF (n=7), IM + anti-VEGF + TIC (n=6). \*p<0.05, \*\*p<0.01 by Mantel-Cox test.
- H) Illustrative ex-vivo bioluminescence imaging of brains from LVRshp53 animals subjected to the indicated treatments. Mice were enrolled in the different treatment arms with similar bioluminescence (neoplastic burden) and analyzed 1 week later. Note that in this model, single tumors typically arise, in contrast to the multi-focality of the transgenic mouse model.
- I) Survival of tumor-bearing LVRshp53 animals subjected to the indicated treatments. Ctrl (n=9), Axitinib (n=8), IM + Axitinib (n=7), IM + Axitinib + CDL (n=10). \*\*\*p<0.001, ns, no statistical significance by Mantel-Cox test.
- J) Normalized bioluminescence signals of LVRshp53 animals treated as indicated after 7 days. Data are represented as mean +/- SEM. Statistical analysis by one-way ANOVA with Tukey's correction. \*p<0.05, ns, no statistical significance. (n=6 per group)

- K) Survival of tumor-bearing LVRshp53 animals comparing the anti-VEGF Mab with a VEGFR TKI when combined with imipramine. IM + anti-VEGF (n=7), IM + Axitinib (n=7). ns, no statistical significance by Mantel-Cox test.
- L) Normalized tumor volume determined by MRI in proneural PDG transgenic mice treated for 7 days with IM + anti-VEGF, compared to untreated. Ctrl (n=7), IM + anti-VEGF (n=10). \*\*\*p<0.001 by Mann-Whitney test. Data are presented as mean ± SEM.
- M) Representative MRI images of tumors in an untreated vs. an IM + anti-VEGF treated PDG animal over the course of 7 days, from the cohorts analyzed in S1L.
- N) Survival of tumor-bearing animals following orthotopic inoculation of GL261 GBM cancer cells. Ctrl (n=6), IM (n=4), IM + anti-VEGF (n=5). Statistical significance by Mantel-Cox test. \*p<0.05, \*\*p<0.01.

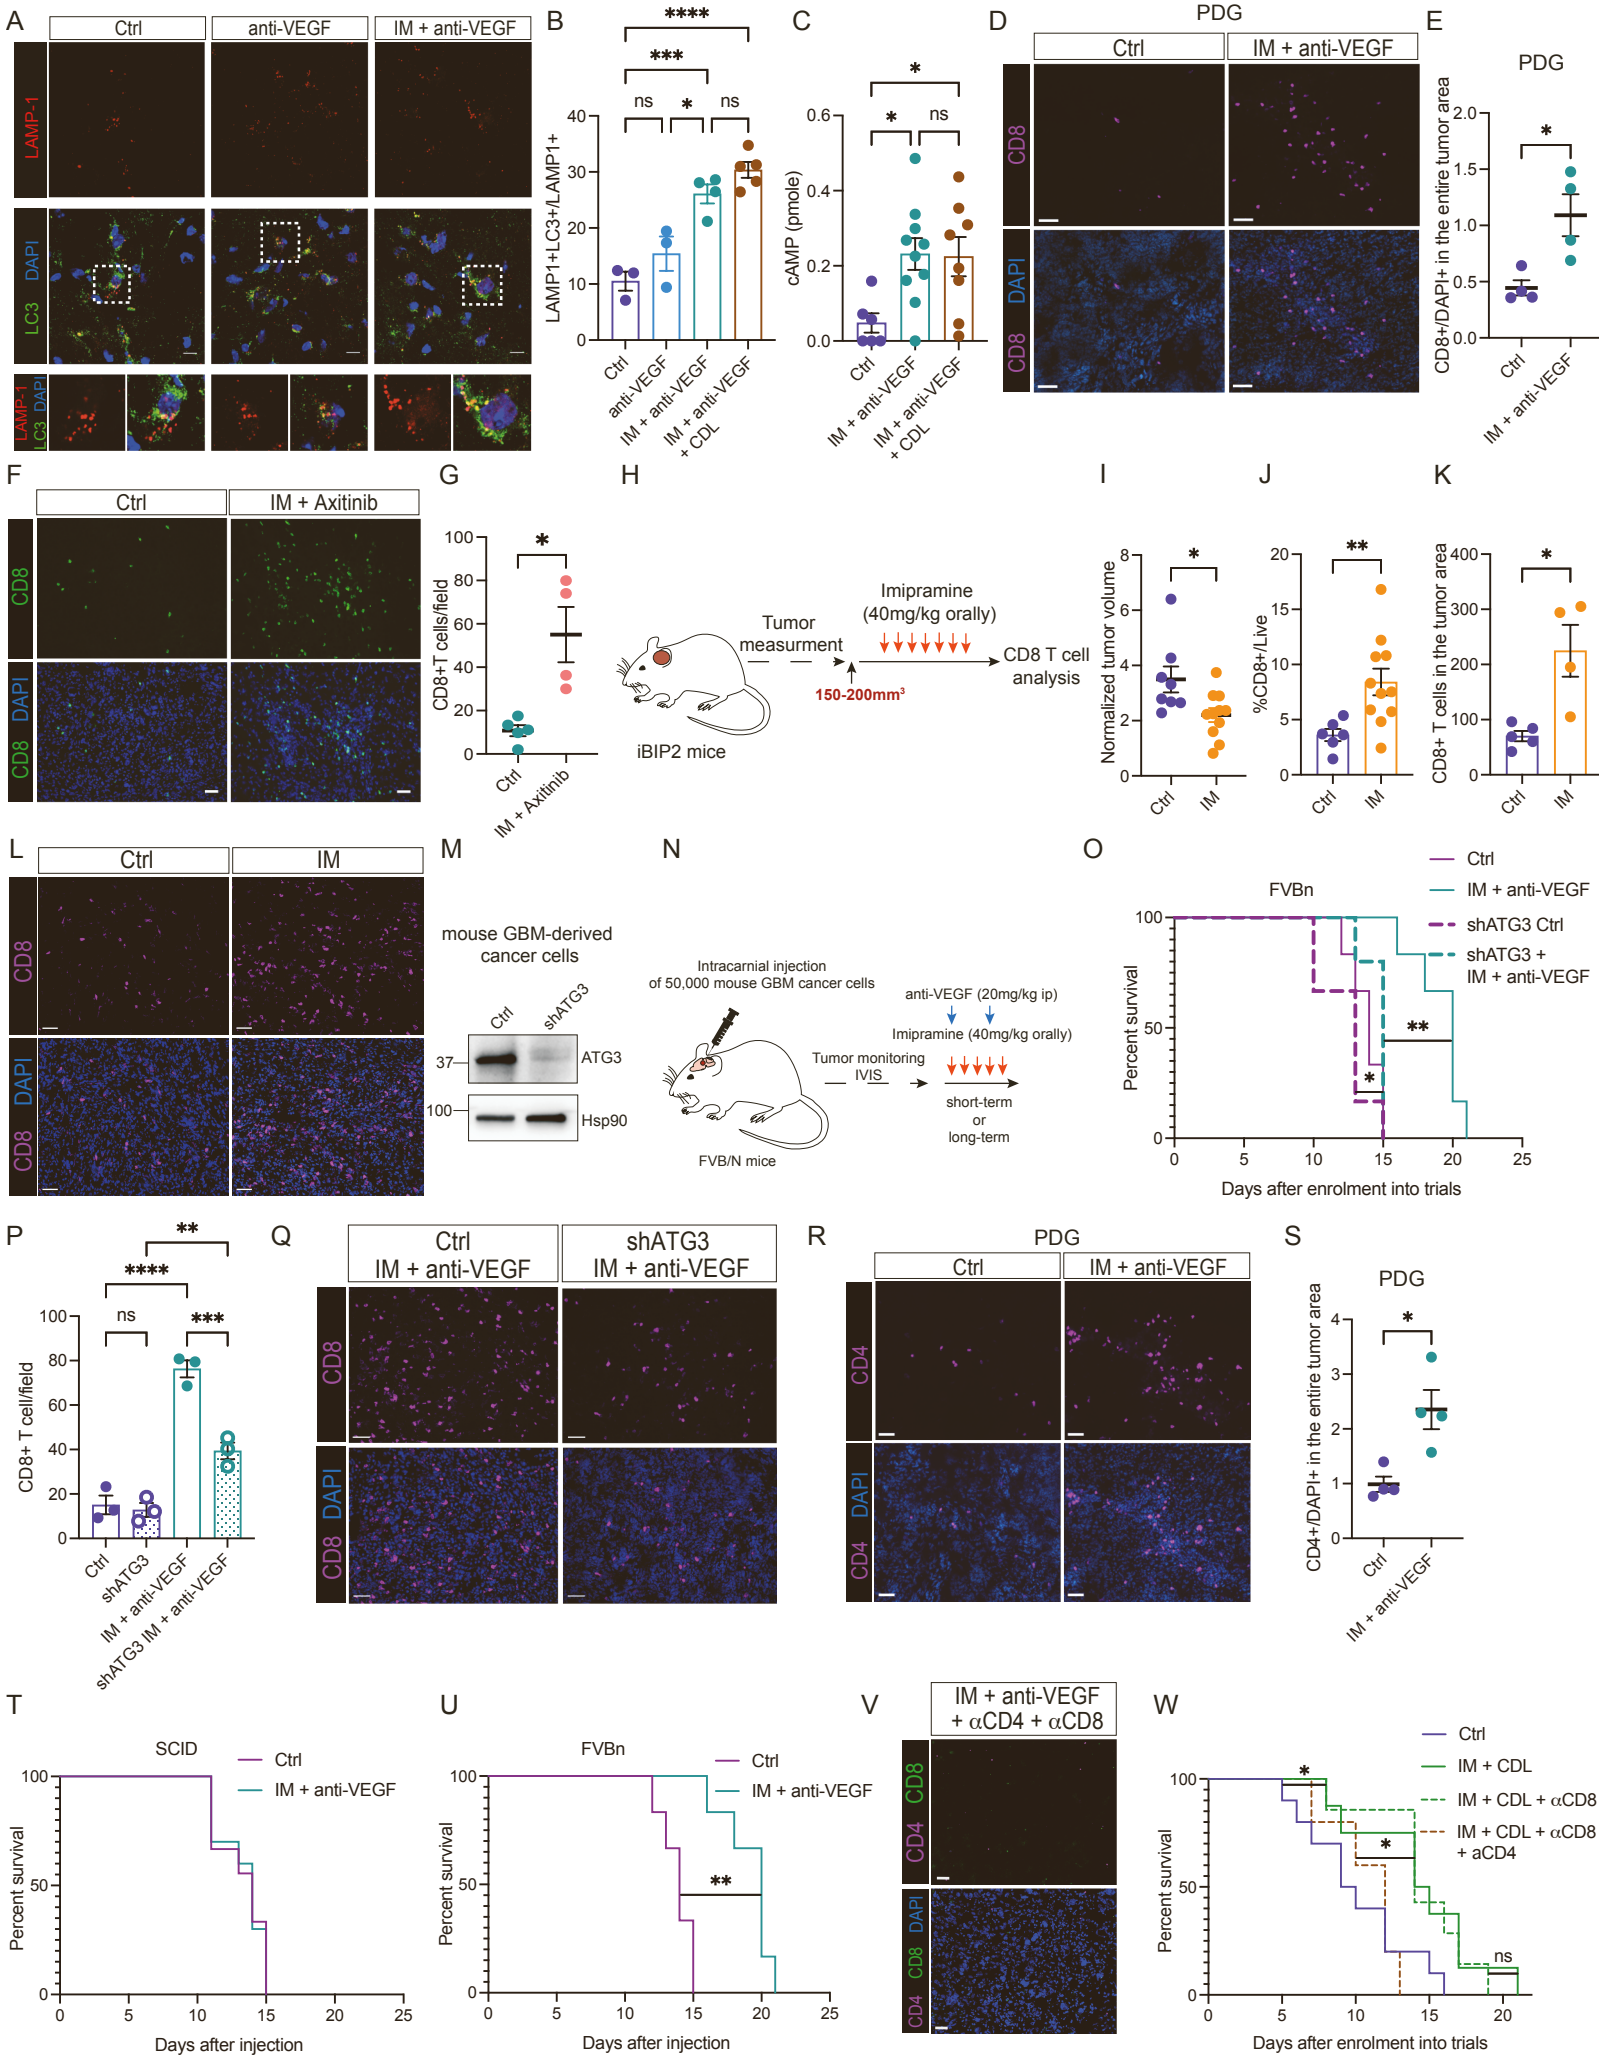



**Fig S2: T lymphocytes are recruited by IM + anti-VEGF in multiple mouse models, and induction of autophagy is functionally important for anti-tumor immunity, related to Fig 1**

- A) Representative images of LC3 (green) and LAMP-1 (red) immunostaining of LVRshp53 tumor samples subjected to the indicated treatment for one week. Bottom panels illustrate the co-localization indicative of the culmination of autophagy in lysosomes, magnified 2.5X. Scale bar 10 $\mu$ m. Images are illustrative of the analysis shown in Fig S2B.
- B) Quantification of LC3 and LAMP1 co-localization as a percentage of total LAMP1 positive lysosomes in LVRshp53 tumor samples subjected to the indicated treatment for one week. Bars represent mean  $\pm$  SEM. Value for each replicate was obtained by averaging the quantification for 6-9 fields per tumor, each from a different mouse. Ctrl (n=3), anti-VEGF (n=3), IM + anti-VEGF (n=4), IM + anti-VEGF + CDL (n=5). Statistical analysis by one-way ANOVA with Tukey's correction. \*\*\*\*p<0.0001, \*\*\*p<0.001, ns, no statistical significance.
- C) cAMP levels in control tumors and tumors treated with IM + anti-VEGF or IM + anti-VEGF + CDL, adjusted to tumor weight. Ctrl (n=6), IM + anti-VEGF (n=10), IM + anti-VEGF + CDL (n=8). Statistical analysis by one-way ANOVA with Tukey's correction. Bars represent mean  $\pm$  SEM. \*p<0.05, ns, no statistical significance.
- D) Representative images of CD8 (magenta) and DAPI nuclear staining (blue) of proneural PDG tumors treated as indicated for 10 days. Scale bar 50 $\mu$ m. Images represent the analysis shown in Fig S2E.
- E) Quantification of CD8 T cells in control (n=4) and IM + anti-VEGF (n=4) tumors from the proneural PDG model. Each dot indicates the total number of CD8 T cells in the entire cross-sectional area of a tissue section from one tumor. Statistical analysis by Mann-Whitney test. \*p<0.05. Data are presented as mean  $\pm$  SEM.
- F) Representative images of CD8 (green) and DAPI nuclear staining (blue) of LVRshp53 tumors treated with IM plus the VEGFR inhibitor Axitinib, as quantified in Fig S2G. Scale bar 50 $\mu$ m.
- G) Quantification of CD8 T cells in LVRshp53 tumors treated with IM plus the VEGFR inhibitor axitinib. Each dot represents the average of 8 to 14 images for one mouse. Ctrl (n=5), IM + Axitinib (n=4). Statistical analysis by Mann-Whitney test. \*p<0.05. Data are presented as mean  $\pm$  SEM.
- H) Schematic of the short-term trials for testing the efficacy of IM in the iBIP2 mouse model of BRAF-driven melanoma.

- I) Normalized iBIP2 tumor volume after 7 days. Ctrl (n=8), IM (n=11). Statistical analysis by Mann-Whitney test. \* $p < 0.05$ . Data are presented as mean  $\pm$  SEM.
- J) Flow cytometry analysis of CD8 T cells in the live cell compartment of iBIP2 melanoma tumors treated as indicated. Ctrl (n=6), IM (n=11). \*\* $p < 0.01$  by Mann-Whitney test. Data are presented as mean  $\pm$  SEM.
- K) Quantification of CD8 immunostaining as a percentage of DAPI-positive cells in full tissue sections of iBIP2 tumors. Ctrl (n=5), IM (n=4). \* $p < 0.05$  by Mann-Whitney test. Data are presented as mean  $\pm$  SEM. Data are presented as mean  $\pm$  SEM.
- L) Representative images of CD8 (magenta) and nuclei (DAPI, blue) in untreated and IM-treated melanoma tumors. Images are illustrative of the analysis shown in Fig S2K. Scale bar 50 $\mu$ m.
- M) Western blot analysis of ATG3 in mouse glioma-derived control and shATG3-transfected cells in culture.
- N) Schematic of the orthotopic syngeneic mouse model designed to evaluate CD8 T cell influx upon ATG3 knockdown in cancer cells.
- O) Survival of mice following orthotopic inoculation with control or shATG3 glioma cell lines treated with IM + anti-VEGF. Ctrl (n=6), IM + anti-VEGF (n=6), shATG3 Ctrl (n=6), shATG3 IM + anti-VEGF (n=5). Statistical analysis by Mantel-Cox test. \* $p < 0.05$ , \*\* $p < 0.01$ .
- P) Quantification of CD8 T cells in control and shATG3 tumors treated with IM + anti-VEGF. Each dot indicates the average of 7 to 11 images from one tumor; tumors from 3 mice were analyzed for each condition. Statistical analysis by one-way ANOVA with Tukey's correction. \*\* $p < 0.01$ , \*\*\* $p < 0.001$ , \*\*\*\* $p < 0.0001$ . Data are presented as mean  $\pm$  SEM.
- Q) Representative images of CD8 (magenta) and nuclei (DAPI, blue) in control and shATG3 tumors treated with IM + anti-VEGF. Images are illustrative of the analysis presented in Fig S2P. Scale bar 50 $\mu$ m.
- R) CD4 (magenta) and DAPI nuclear staining (blue) of proneural PDG tumors treated with IM + anti-VEGF for 10 days, representative of the analysis shown in Fig S2S. Scale bar 50 $\mu$ m.
- S) Quantification of CD4 T cells in control (n=4) and IM + anti-VEGF (n=4) tumors from the PDG model. Each dot indicates the total number of CD8 T cells in the entire cross-sectional area of a tissue section from one tumor; 4 tumors were analyzed, each from a different mouse. Statistical analysis by Mann-Whitney test. \* $p < 0.05$ . Data are mean  $\pm$  SEM.
- T) Survival of immunocompromised SCID animals orthotopically transplanted with a mouse-derived glioma cell line and treated with IM + anti-VEGF. Experiments from panel T and U were performed at the same time with the same batch of cells. Ctrl (n=9) and IM + anti-VEGF (n=10). Ns, no statistical significance by Mantel-Cox test.

- U) Survival of immunocompetent FVBn animals orthotopically transplanted with a mouse-derived glioma cell line and treated with IM + anti-VEGF. Ctrl (n=6) and IM + anti-VEGF (n=6). \*\*p<0.01 by Mantel-Cox test.
- V) Representative image from a tumor-bearing LVRshp53 animal treated with IM + CDL plus depleting antibodies to CD8 and CD4 T cells, illustrating the depletion. Image is illustrative of a whole-tumor scan from 3 different tumors. Scale bar 50 $\mu$ m.
- W) Survival of tumor-bearing LVRshp53 animals treated with IM + CDL +/- depleting antibodies to assess the functional contributions of CD8 and CD4 T cells to survival benefit. Ctrl (n=10), IM + CDL (8), IM + CDL +  $\alpha$ CD8 +  $\alpha$ CD4 (n=5), IM + CDL +  $\alpha$ CD8 (n=7). \*p<0.05, ns, no statistical significance by Mantel-Cox test.

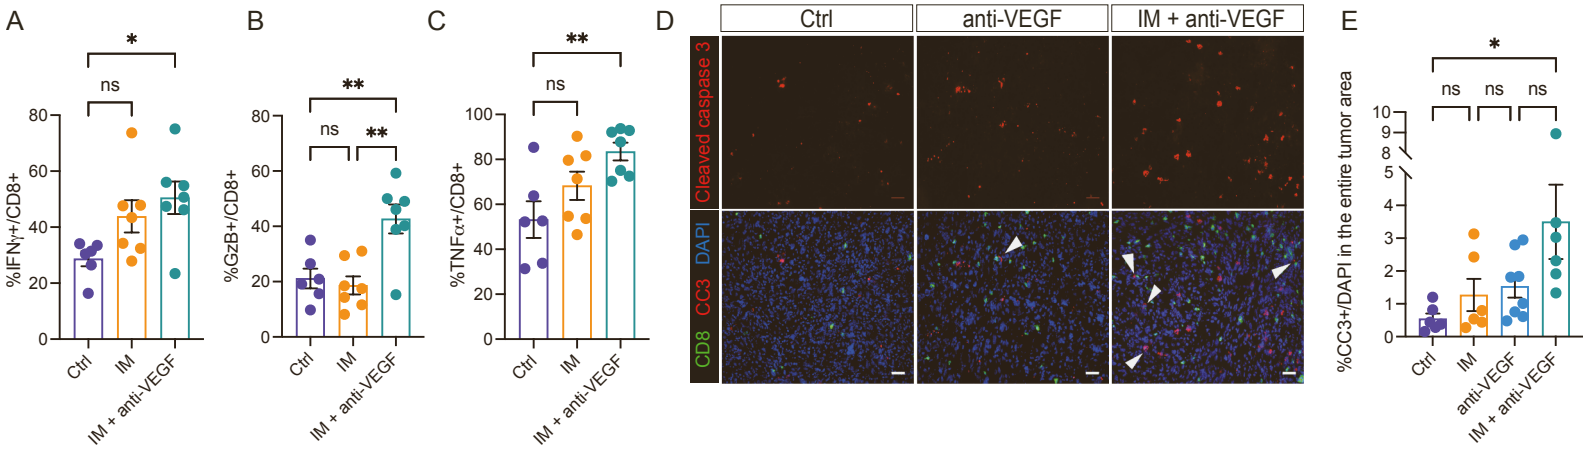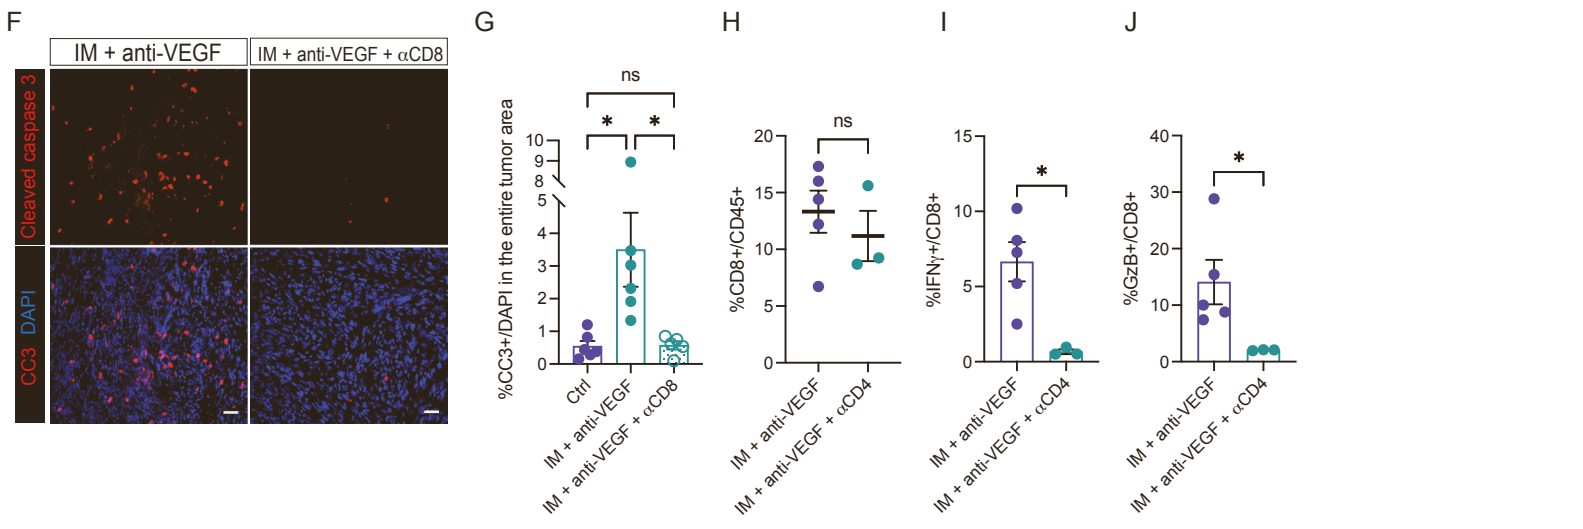

**Fig S3: Further characterization of the activities of intratumoral CD8 and CD4 T cells,**  
related to Fig 2

- A) Flow cytometry analysis of IFN $\gamma$  intracellular staining in fixed and permeabilized CD8+T cells isolated from tumors treated with IM or IM + anti-VEGF. Ctrl (n=6), IM (n=7), IM + anti-VEGF (n=7). Statistical analysis by one-way ANOVA with Tukey's correction. \*p<0.05, ns, no statistical significance.
- B) Flow cytometry analysis of GzB intracellular staining in fixed and permeabilized CD8 T cells, as in A). Ctrl (n=6), IM (n=7), IM + anti-VEGF (n=7). Statistical analysis by one-way ANOVA with Tukey's correction. \*\*p<0.01, ns, no statistical significance.
- C) Flow cytometry analysis of TNF $\alpha$  intracellular staining in fixed and permeabilized CD8 T cells, as in A). Ctrl (n=6), IM (n=7), IM + anti-VEGF (n=7). Statistical analysis by one-way ANOVA with Tukey's correction. \*\*p<0.01, ns, no statistical significance.
- D) Representative Cleaved Caspase-3 (CC-3) (red), CD8 (green) and DAPI (blue) staining of LVRshp53 tumors subjected to indicated treatments. Images are representative of 8-10 images from 3 different tumors. White arrows show adjacent CD8+ and CC-3+ cells. Scale bar 50 $\mu$ m.
- E) Quantification of CC-3 positive cells in the entire tumor area in LVRshp53 tumors. Ctrl (n=6), IM (n=6), anti-VEGF (n=8), IM + anti-VEGF (n=6). \*p<0.05, ns, no statistical significance by one-way ANOVA with Tukey's correction.
- F) Representative CC-3 (red) and DAPI staining of CD8-depleted and nondepleted LVRshp53 tumors undergoing treatment with IM + anti-VEGF. Images are illustrative of 8-10 images from 3 different tumors. Scale bar 50 $\mu$ m.
- G) Quantification of CC-3 immunostaining as a percentage of DAPI-positive cells in the whole LVRshp53 tumor area. Ctrl (n=6), IM + anti-VEGF (n=6), IM + anti-VEGF +  $\alpha$ CD8 (n=5). Statistical analysis by one-way ANOVA. \*p<0.05, ns, no statistical significance.
- H) Flow cytometry analysis of CD8 T cells in tumors treated with IM + anti-VEGF +/- depletion of CD4 T cells. IM + anti-VEGF (n=5), IM + anti-VEGF +  $\alpha$ CD4 (n=3). Statistical analysis by Mann-Whitney test, ns, no statistical significance.
- I) Flow cytometry analysis of IFN $\gamma$  intracellular staining in fixed and permeabilized CD8 T cells from tumors treated with IM + anti-VEGF +/- depletion of CD4 T cells. IM + anti-VEGF (n=5), IM + anti-VEGF +  $\alpha$ CD4 (n=3). Statistical analysis by Mann-Whitney test, \*p<0.05.

J) Flow cytometry analysis of GzB intracellular staining in fixed and permeabilized CD8 T cells, as for H/I). IM + anti-VEGF (n=5), IM + anti-VEGF +  $\alpha$ CD4 (n=3). \*p<0.05 by Mann-Whitney test.

Quantitative data in all relevant panels are presented as mean  $\pm$  SEM.

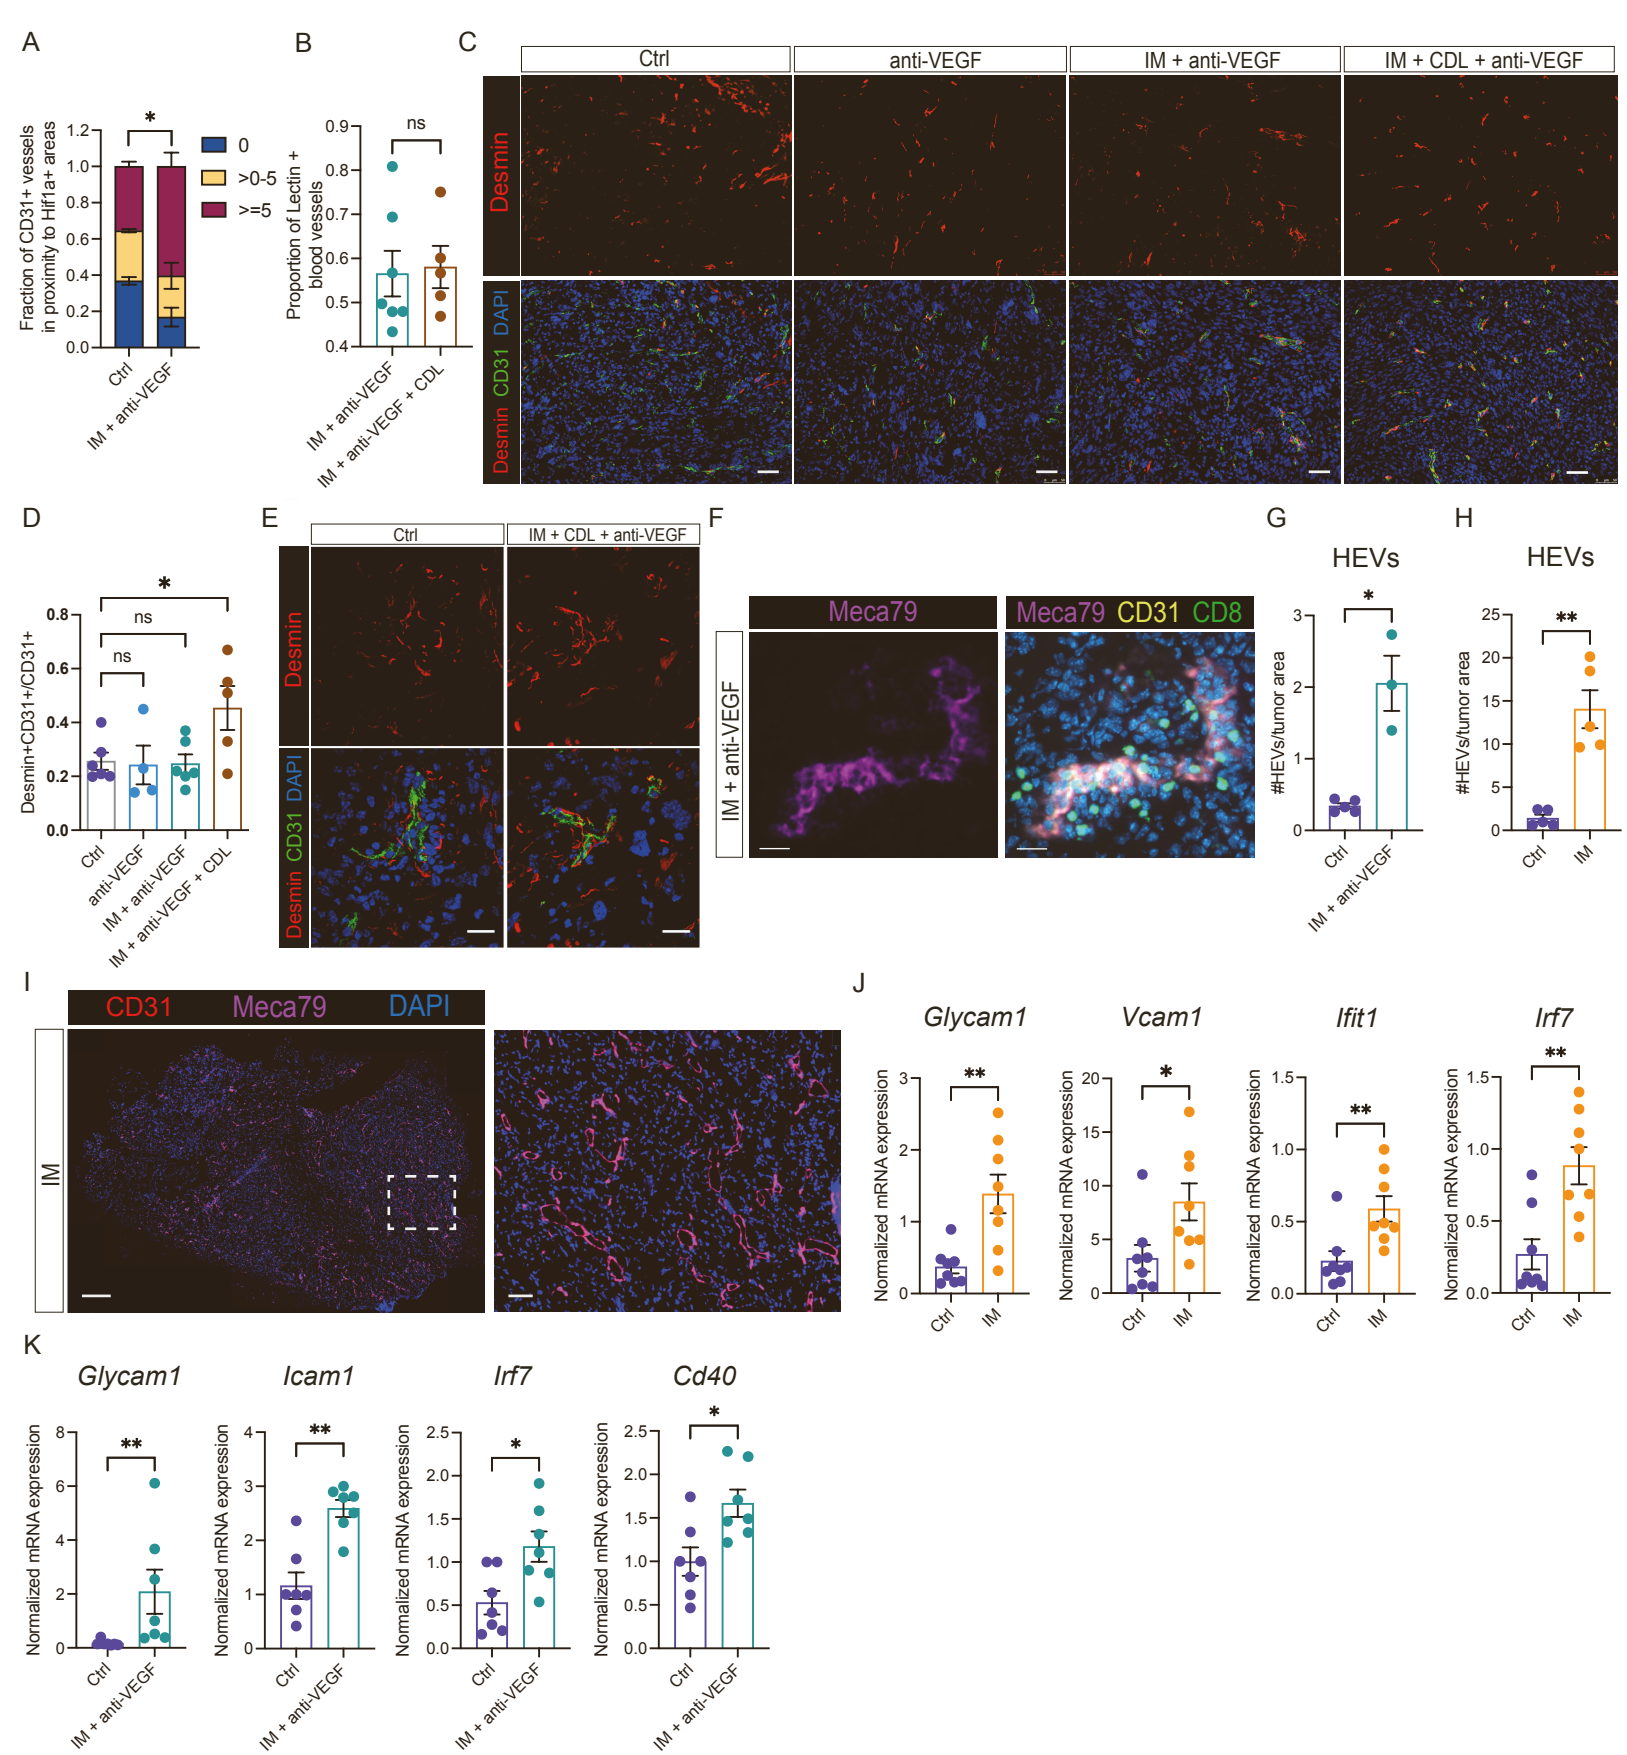

**Fig S4: Tumor vessels are remodeled ('quasi-normalized') upon treatment with IM + anti-VEGF in GBM and melanoma tumors, related to Fig 3**

- A) Fraction of CD31<sup>+</sup> vessels located in HIF1 $\alpha$ <sup>+</sup> zones in the entire area of full sections of GBM tumors. The zones were divided into 0 $\mu$ m (i.e., within the Hif1 $\alpha$ <sup>+</sup> zone), >0 and <5 $\mu$ m, and >5 $\mu$ m. Ctrl (n=5), IM + anti-VEGF (n=6). \*p<0.05 by Mann-Whitney test.
- B) The proportion lectin<sup>+</sup> blood vessels is not affected by the addition of CDL. Each dot indicates the average of 8 to 12 fields in tissue sections from a GBM tumor from one mouse. IM + anti-VEGF (n=7), IM + anti-VEGF + CDL (n=5). Statistical analysis by Mann-Whitney test. Bars represent mean +/- SEM. ns, no statistical significance.
- C) Representative immunofluorescence of desmin (red), CD31 (green) and DAPI (blue) in animals treated for 1 week, as indicated. Images are representative of the analysis performed in Fig S4C. Scale bar 50 $\mu$ m.
- D) Quantification of desmin<sup>+</sup> and CD31<sup>+</sup> cells as a percentage of CD31 positive areas within tissue sections from tumors treated as indicated. Ctrl (n=6), anti-VEGF (n=4), IM + anti-VEGF (n=6), IM + anti-VEGF + CDL (n=5). Statistical analysis by one-way ANOVA. \*p<0.05, ns, no statistical significance.
- E) Representative high magnification images of desmin<sup>+</sup> and CD31<sup>+</sup> cells. Scale bar 10 $\mu$ m. Images are representative of the analysis performed in Fig S4C.
- F) Representative immunofluorescence of MECA79 (magenta), CD31 (bright yellow) and CD8 (green) of proneural PDG tumors treated as indicated for 10 days. Scale bar 20 $\mu$ m. Images are illustrative of the analysis in Fig S4E.
- G) Quantification of immunostaining for HEVs in PDG tumors treated with IM + anti-VEGF (n=3) or untreated controls (n=5). The data are shown as number of HEVs per mm<sup>2</sup> of tumor tissue. \*p<0.05 by Mann-Whitney test.
- H) Quantification of immunostaining for HEVs in iBIP2 melanoma tumors treated with IM. Ctrl (n=5) and IM (n=5). The data are shown as number of HEVs per mm<sup>2</sup> of tumor tissue. \*\*p<0.01 by Mann-Whitney test.
- I) Representative immunofluorescence images of MECA79 (magenta), CD31 (red) and DAPI (blue) in iBIP2 melanoma tumors treated with IM. Scale bars 250 $\mu$ m and 50 $\mu$ m. Images are illustrative of the analysis shown in Fig S4F.
- J) mRNA expression of *Glycam1*, *Vcam1*, *Ifit1* and *Irf7* in CD31<sup>+</sup> endothelial cells from melanoma tumors subjected to IM (n=8) or untreated (n=8). Statistical significance by Mann-Whitney test. \*p<0.05, \*\*p<0.01.



K) mRNA profiling of endothelial cells isolated from PDG glioma tumors. The expression of *Glycam1*, *Icam1*, *Irf7* and *Cd40* was normalized to *18S* RNA. \*p<0.05, \*\*p<0.01 by Mann-Whitney test.

Quantitative data in all relevant panels are presented as mean  $\pm$  SEM.

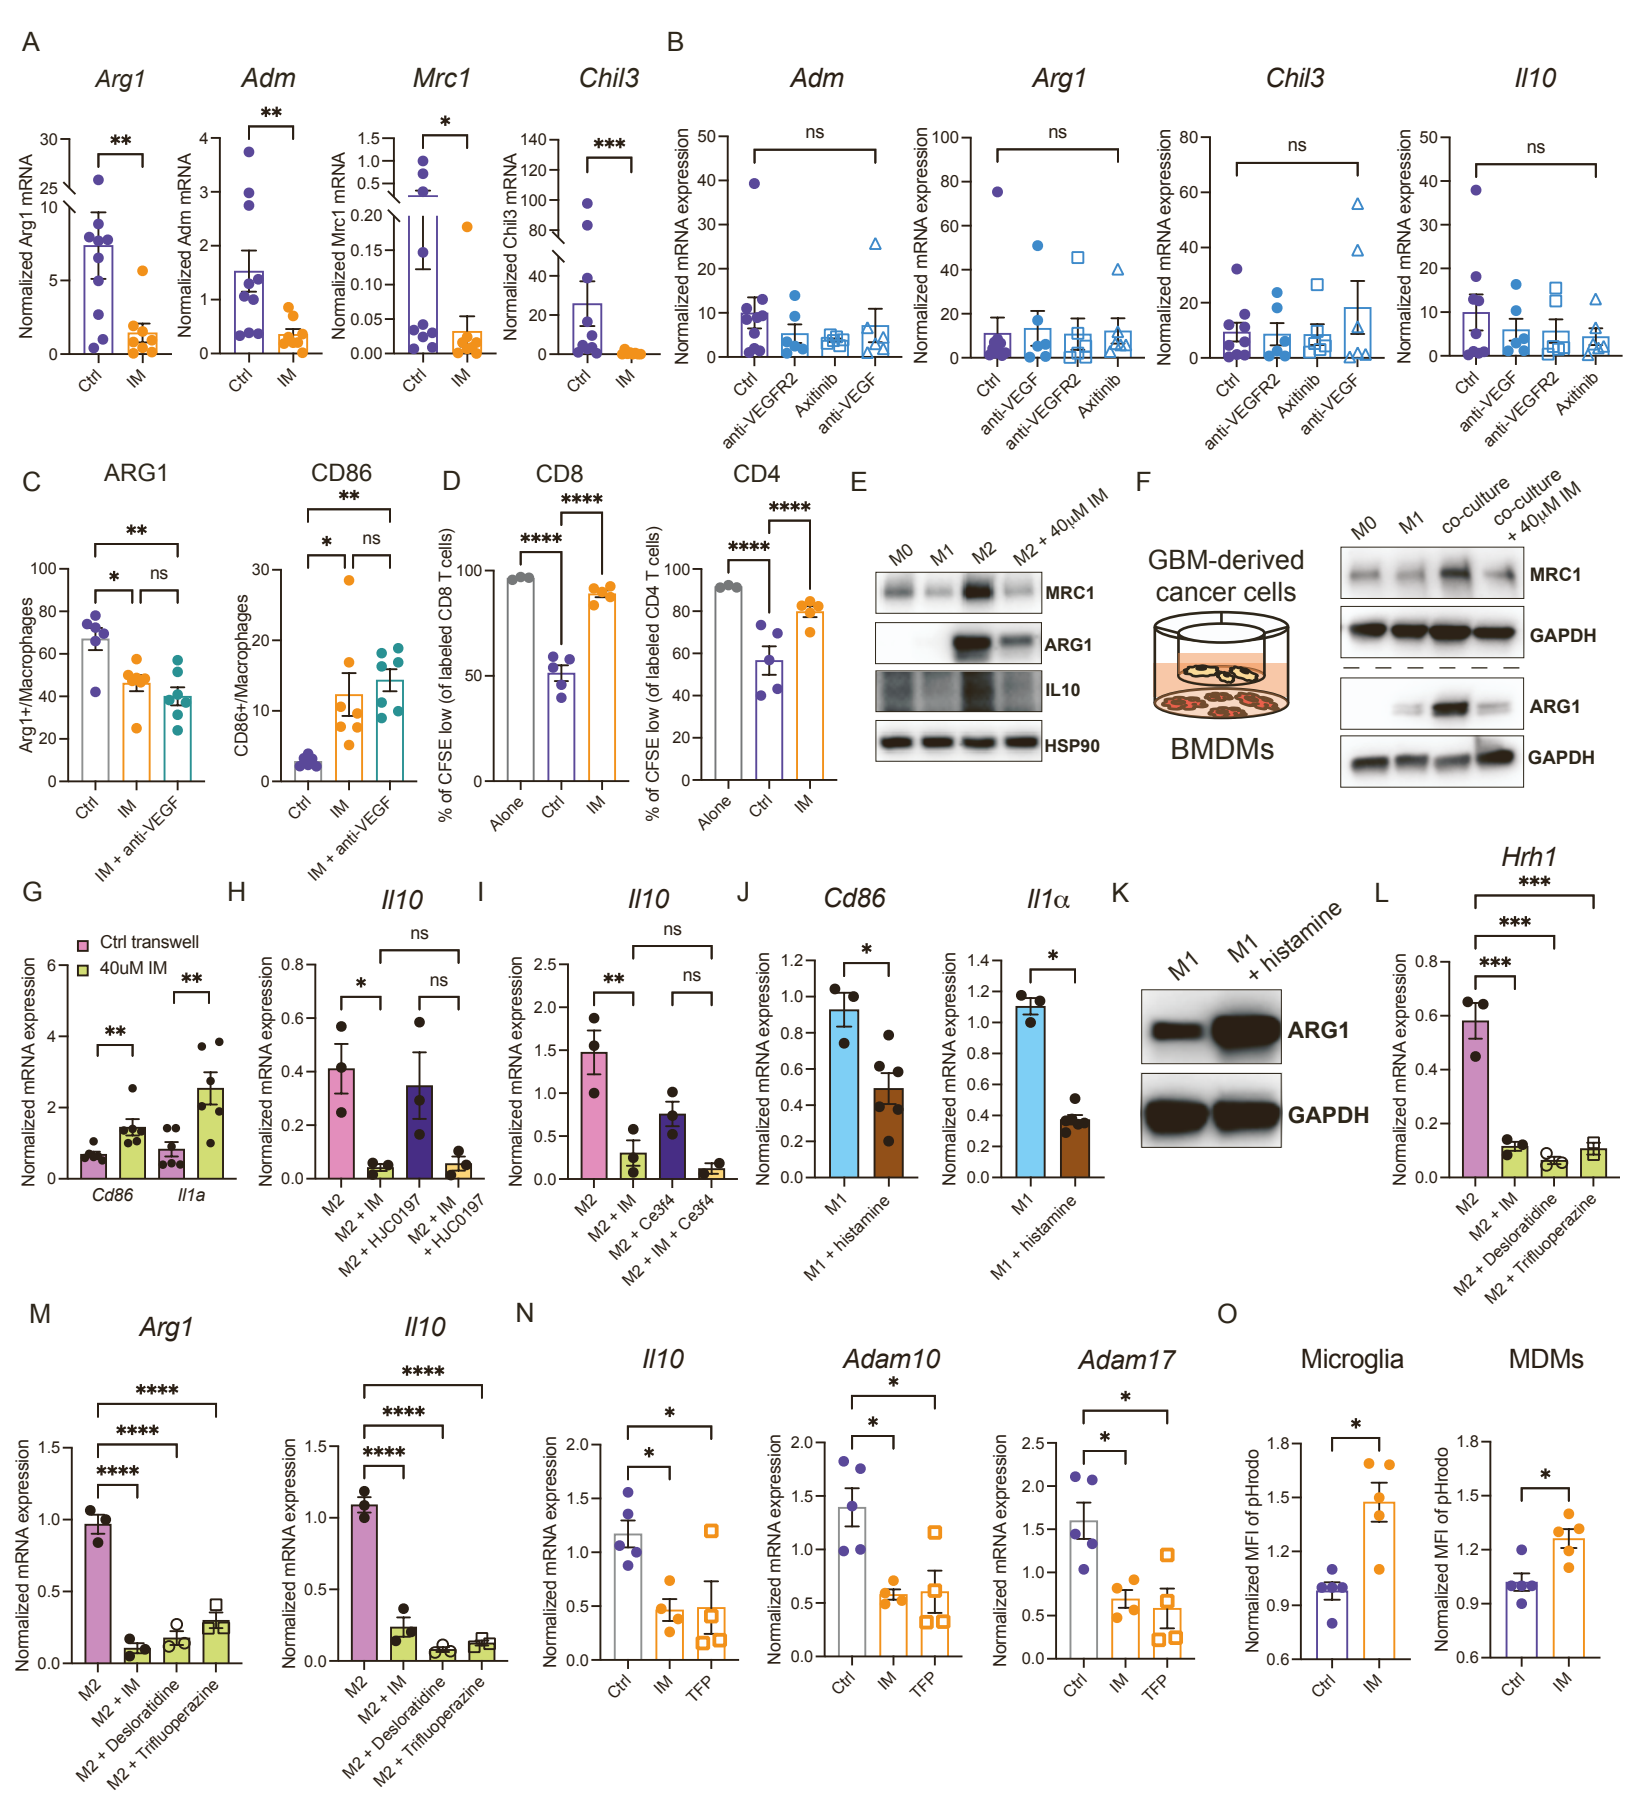

Fig S5: **Imipramine reprograms immunosuppressive myeloid cells via HRH1 targeting**, related to Fig 4

- A) mRNA expression of the M2-like macrophage markers *Arg1*, *Adm*, *Mrc1* and *Chil3* in Ctrl (n=10) and IM-treated (n=8) LVRshp53 tumors. \*\*\*p<0.001, \*\*p<0.01, \*p<0.05 by Mann-Whitney test.
- B) mRNA expression of the M2-like markers *Adm*, *Arg1*, *Chil3* and *Il10* in Ctrl (n=9-10), anti-VEGFR2 (DC101) (n=6), Axitinib (n=6), anti-VEGF (n=6) treated tumors. ns, no statistical significance by one-way ANOVA.
- C) Flow cytometry analysis of ARG1 and CD86 expression in proneural PDG glioma tumors treated for one week. Ctrl (n=6), IM (n=7), IM + anti-VEGF (n=7). Macrophages were gated as CD45<sup>+</sup>CD11b<sup>+</sup>Ly6C<sup>-</sup>Ly6G<sup>-</sup>. Statistical analysis by one-way ANOVA with Tukey's correction. \*p<0.05, \*\*p<0.01, ns, no statistical significance.
- D) Co-cultures of tumoral CD11b cells from PDG tumors combined with activated splenic CFSE-labeled CD8 or CD4 T cells. Each dot represents the average of 1-3 technical replicates. T cells alone (n=3), Ctrl co-cultures (n=5), and co-cultures with anti-VEGF (n=3) or IM (n=5). Statistical analysis by two-way ANOVA. \*\*\*\*p<0.0001, ns, no statistical significance.
- E) Western blot analysis of ARG1, MRC1 and IL10 in *ex-vivo* polarized bone marrow-derived macrophages. M2-like BMDMs were treated with 40μM imipramine for 24 hours. Experiment was repeated 3 times.
- F) Western blot analysis of MRC1 and ARG1 in polarized bone marrow-derived macrophages in transwell co-cultures with cancer cells derived from the LVRshp53 GBM mouse model. M2-like BMDMs were treated with 40μM imipramine for 24 hours. Data are representative of 2 independent experiments.
- G) Analysis of the M1-like marker genes *CD86* and *IL1α* in polarized BMDMs in a transwell assay with cancer cells +/- IM as assessed by qRT-PCR and normalized to *18S* RNA. Cells were treated with 40μM imipramine for 24 hours. \*\*p<0.01 by Mann-Whitney test. Data are representative of 2 independent experiments.
- H) Analysis of *Il10* expression in M2-polarized BMDMs treated with 40μM IM, 25 μM HJC0197 or the combination for 24 hours. Expression is normalized to *18S* RNA. \*p<0.05, ns, no statistical significance by one-way ANOVA. Data are representative of 2 independent experiments.

- I) Analysis of *Il10* expression in M2-polarized BMDMs treated with 40 $\mu$ M IM, 50  $\mu$ M Ce3f4 or the combination for 24 hours. Expression is normalized to *18S* RNA. \* $p < 0.05$ , ns, no statistical significance by one-way ANOVA. Data are representative of 2 independent experiments.
- J) mRNA levels of *Cd86* and *Il1a* in M1-polarized BMDMs treated with 50 $\mu$ M histamine for 24 hours. \* $p < 0.05$  by Mann-Whitney test. Data are representative of 2 independent experiments.
- K) Western blot analysis of ARG1 in one of the replicates from panel J).
- L) mRNA expression of *Hrh1* normalized to *18S* RNA in M2-polarized BMDMs, either untreated or treated with 40 $\mu$ M imipramine, 10 $\mu$ M desloratadine or 10 $\mu$ M trifluoperazine for 24 hours. \*\*\* $p < 0.001$  by one-way ANOVA with Tukey's correction. Data are representative of 2 independent experiments.
- M) Analysis of the *Arg1* and *Il10* expression in M2-polarized macrophages treated as indicated, as assessed by qRT-PCR. Cells were treated with 40  $\mu$ M imipramine, 10  $\mu$ M desloratadine or 10  $\mu$ M trifluoperazine for 24 hours. \*\*\*\* $p < 0.0001$  by one-way ANOVA with Tukey's correction. Data are representative of 2 independent experiments.
- N) mRNA expression of *Il10*, *Adam10* and *Adam17* in CD11b cells isolated from tumors treated with IM (n=4) or TFP (n=4) or untreated controls (n=5). Statistical analysis by one-way ANOVA. \* $p < 0.05$ .
- O) Sorted microglia and MDMs from untreated or IM-treated PDG glioma tumors assayed with green pHrodo *Staphylococcus aureus* bioparticles to assess their capability for phagocytosis. Data presented as MFI of pHrodo/live cells. Statistical analysis by Mann-Whitney test. \* $p < 0.05$ .

Quantitative data in all relevant panels are presented as mean  $\pm$  SEM.

**A**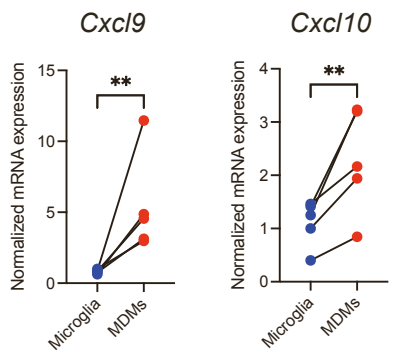**B**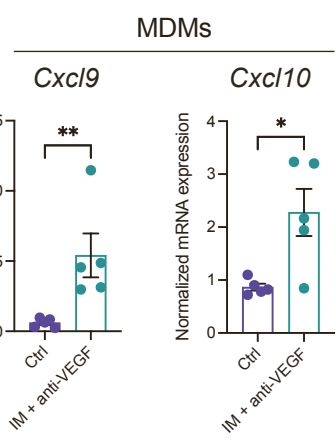**C**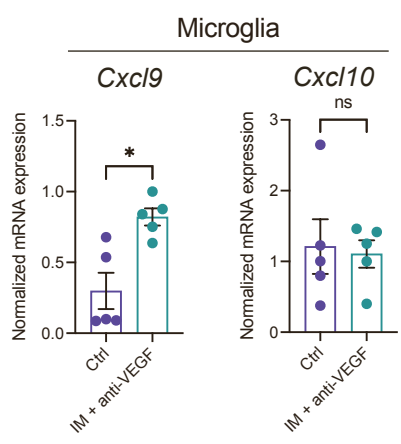**D**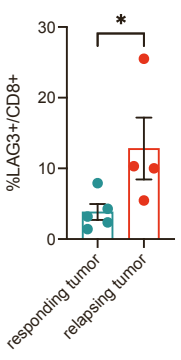**E**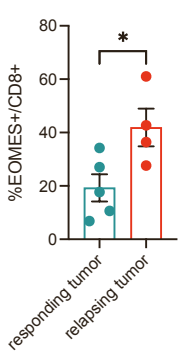**F**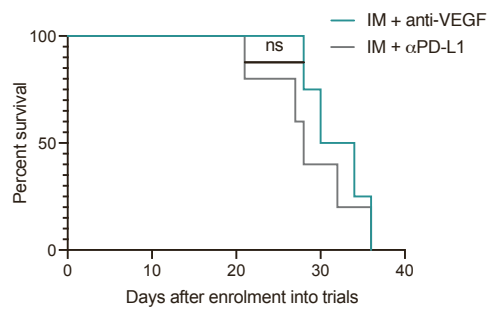

**Fig S6: CXCR3 ligands are also upregulated in proneural (PDG) tumors in response to IM + anti-VEGF, and the combination of IM +  $\alpha$ PD-L1 has a similar therapeutic benefit to IM + anti-VEGF in LVRshp53 animals, related to Fig 6 and Fig 7**

- A) mRNA expression of *Cxcl9* and *Cxcl10* in sorted microglia and MDMs from proneural glioma tumors in PDG transgenic mice treated with IM + anti-VEGF (n=5). Statistical analysis by ratio paired t test. \*\*p<0.01.
- B) mRNA expression of *Cxcl9* and *Cxcl10* in untreated (n=5) or IM + anti-VEGF-treated (n=5) FACS-sorted MDMs from PDG tumors as assessed by qRT-PCR. Statistical analysis by Mann-Whitney test. \*p<0.05, \*\*p<0.01.
- C) mRNA expression of *Cxcl9* and *Cxcl10* in untreated (n=5) or IM + anti-VEGF-treated (n=5) FACS-sorted microglia from PDG tumors as assessed by qRT-PCR. \*p<0.05, ns, no statistical significance by Mann-Whitney test.
- D) Flow cytometry analysis of LAG3 staining in CD8 T cells in responding (n=5) and relapsing tumors (n=4). Statistical analysis by Mann-Whitney test. \*p<0.05.
- E) EOMES expression in CD8 T cells assessed by flow cytometry. Responding tumors (n=5), relapsing tumors (n=4). \*p<0.05 by Mann-Whitney test.
- F) Survival of tumor-bearing LVRshp53 animals subjected to IM + anti-VEGF (n=5) or IM +  $\alpha$ PD-L1 (n=4). Statistical significance by Mantel-Cox test. ns, no statistical significance.

Quantitative data in all relevant panels are presented as mean  $\pm$  SEM.”

Table S1: **List of primers used for qRT-PCR**, related to STAR Methods section RNA isolation, reverse transcription, and quantitative RT-PCR

| Name                          | Forward sequence             | Reverse sequence              |
|-------------------------------|------------------------------|-------------------------------|
| <i>I8s</i>                    | GTAACCCGTTGAACCCATT          | CCATCCAATCGGTAGTAGCG          |
| <i>Gapdh</i>                  | AGGTCGGTGTGAACGGAT           | TGTAGACCATGTAGTTGAGGTC<br>A   |
| <i>Adm</i>                    | CACCCTGATGTTATTGGG           | TTAGCGCCCACTTATTCCACT         |
| <i>Arg1</i>                   | CAGAAGAATGGAAGAGTCAG         | CAGATATGCAGGGAGTCACC          |
| <i>Chil3</i>                  | CAGGTCTGGCAATTCTTCTGA        | GTCTTGCTCATGTGTGTAAGTGA       |
| <i>Mrc1</i>                   | CTCTGTTTCTGCTATTGGACGC       | CGGAATTTCTGGGATTCAGCTTC       |
| <i>Il10</i>                   | GCTCTTACTGACTGGCATGAG        | CGCAGCTCTAGGAGCATGTG          |
| <i>iNos</i>                   | TTTGCTTCCATGCTAATGCGAA<br>AG | GCTCTGTTGAGGTCTAAAGGCT<br>CCG |
| <i>F13a1</i>                  | GAGCAGTCCCGCCCAATAAC         | CCCTCTGCGGACAATCAACTTA        |
| <i>Il1<math>\alpha</math></i> | GCACCTTACACCTACCAGAGT        | AAACTTCTGCCTGACGAGCTT         |
| <i>Cd86</i>                   | TGTTTCCGTGGAGACGCA           | TTGAGCCTTTGTAAATGG            |
| <i>Hrh1</i>                   | CTGGTGCTGTATGCAGTGC          | GCTACCGACAGGCTGACAA           |
| <i>Stab1</i>                  | GGCAGACGGTACGGTCTAAAC        | AGCGGCAGTCCAGAAGTATCT         |
| <i>Il1r2</i>                  | GTTTCTGCTTTCACCACTCCA        | GAGTCCAATTTACTCCAGGTCA<br>G   |
| <i>Cxcl9</i>                  | GGAGTTCGAGGAACCCTAGTG        | GGGATTTGTAGTGGATCGTGC         |
| <i>Cd49d</i>                  | GATGCTGTTGTTGTACTIONCGG      | ACCACTGAGGCATTAGAGAGC         |
| <i>Glycam1</i>                | TCAGCTGCAACCACCTCAG          | TTCGTGATACGACTGGCACC          |
| <i>Icam1</i>                  | GTGATGCTCAGGTATCCA           | CACAGTTCTCAAAGCACA            |
| <i>Vcam1</i>                  | AGTTGGGGATTTCGGTTGTTCT       | CCCCTCATTCTTACCACCC           |
| <i>Irf7</i>                   | GAGACTGGCTATTGGGGGAG         | GACCGAAATGCTTCCAGGG           |
| <i>Cd40</i>                   | TTGTTGACAGCGGTCCATCTA        | GCCATCGTGGAGGTACTGTTT         |
| <i>Ifit1</i>                  | CTGAGATGTCACCTCACATGG<br>AA  | GTGCATCCCCAATGGGTTCT          |
| <i>Mmp2</i>                   | CAAGTTCCCCGGCGATGTC          | TTCTGGTCAAGGTCACCTGTC         |
| <i>Mmp9</i>                   | CTGGACAGCCAGACACTAAAG        | CTCGCGGCAAGTCTTCAGAG          |
| <i>Adam10</i>                 | ATGGTGTGCGGACAGTGTTA         | GTTTGGCACGCTGGTGTTTTT         |

|               |                             |                      |
|---------------|-----------------------------|----------------------|
| <i>Adam17</i> | AGGACGTAATTGAGCGATTTT<br>GG | TGTTATCTGCCAGAACTCCC |
|---------------|-----------------------------|----------------------|
